# Supplementary material for: Divergent Cl- and H+ pathways underlie transport coupling and gating in CLC exchangers and channels
Source: eLife. 2020 Apr 28;9:e51224. doi: 10.7554/eLife.51224 (PMC7274781; doi:10.7554/eLife.51224)
Supplement: Figure 4—source data 1. [file elife-51224-fig4-data1.xlsx]

## Sheet: Sheet1
time(sec)	WT	F190A	F357A	F357L	E148A	EAF190A	EAF357A
0	-0.003839	-0.0316	-0.0112	-1.7688e-05	-0.0216	-0.0045649	-0.0054286
0.1	-0.0033289	-0.0253	-0.0144	-0.0040028	-0.0201	-0.0033599	-0.0043347
0.2	-0.0054003	-0.019	-0.0096542	-0.007981	-0.0201	-0.0057608	-0.0048823
0.3	-0.0064406	-0.0161	-0.012	-0.0093062	-0.0191	-0.0075615	-0.0081608
0.4	-0.0043596	-0.0080532	-0.012	-0.0113	-0.0176	-0.0051549	-0.007068
0.5	-0.0043596	-0.0080532	-0.0080817	-0.01	-0.0181	-0.0051549	-0.007068
0.6	-0.00488	-0.00575	-0.012	-0.0093062	-0.0176	-0.0093596	-0.0043347
0.7	-0.0028081	2.3692e-05	-0.008868	-0.0073188	-0.0181	-0.0081606	-0.0037881
0.8	0.00030869	0.0081401	-0.0096542	-0.0040028	-0.0191	-0.01	-0.0065221
0.9	-0.001245	0.0052416	-0.0104	-0.0033383	-0.0191	-0.0087596	-0.005976
1	0.0013522	-0.0022851	-0.0112	0.0013106	-0.0166	-0.01	-0.001051
1.1	-0.00021286	-0.0022851	-0.0065247	0.0026408	-0.0171	-0.0075615	0.00059245
1.2	0.00030869	0.0011849	-0.0128	0.00064636	-0.0161	-0.0112	0.0044356
1.3	-0.0017661	0.0034971	-0.0096542	0.0046366	-0.0161	-0.0075615	0.0055261
1.4	-0.0022872	0.0029277	-0.008868	0.0106	-0.0156	-0.006961	0.0011413
1.5	-0.0022872	0.0081401	-0.012	0.0113	-0.0166	-0.0087596	0.0022337
1.6	-0.00021286	0.0052416	-0.0112	0.0086339	-0.0161	-0.0075615	0.002784
1.7	0.0013522	0.0064053	-0.008868	0.0106	-0.0166	-0.0051549	0.0099267
1.8	0.0029076	0.0040784	-0.0151	0.0133	-0.0161	-0.0057608	0.0132
1.9	-0.0028081	0.0058234	-0.0136	0.0133	-0.0146	-0.0075615	0.0121
2	-0.0022872	0.0064053	-0.012	0.018	-0.0156	-0.0057608	0.016
2.1	-0.0022872	0.0081401	-0.0144	0.022	-0.0156	-0.0063616	0.0143
2.2	-0.0033289	0.0081401	-0.0128	0.0253	-0.0146	-0.0075615	0.0066283
2.3	0.0039523	0.0058234	-0.0080817	0.0253	-0.0151	-0.0051549	0.002784
2.4	0.00083036	0.0075578	-0.012	0.024	-0.0161	-0.0057608	0.0011413
2.5	0.00030869	0.0064053	-0.0073113	0.0213	-0.0166	-0.0027572	0.0016947
2.6	-0.0022872	0.0034971	-0.0057379	0.022	-0.0161	-0.0039625	-0.001051
2.7	-0.00021286	2.3692e-05	-0.0073113	0.0227	-0.0161	-0.0057608	-0.0054286
2.8	-0.0017661	2.3692e-05	-0.0057379	0.0207	-0.0151	-0.0063616	-0.0043347
2.9	-0.00072365	0.0058234	-0.0049509	0.0233	-0.0171	-0.0063616	0.0033344
3	0.00083036	0.0052416	-0.0096542	0.0233	-0.0166	-0.0039625	0.0105
3.1	-0.0017661	0.0034971	-0.0049509	0.0227	-0.0156	-0.0033599	0.0182
3.2	0.00030869	0.0058234	-0.0057379	0.0193	-0.0166	-0.0039625	0.0198
3.3	-0.0033289	0.0040784	-0.0080817	0.02	-0.0161	-0.0039625	0.0243
3.4	-0.0054003	0.0011849	-0.0073113	0.0173	-0.0166	-0.0021543	0.0221
3.5	-0.0028081	0.0040784	-0.0065247	0.018	-0.0171	-0.0045649	0.0237
3.6	-0.003839	0.0052416	-0.0080817	0.014	-0.0166	-0.0039625	0.0193
3.7	-0.0017661	0.0034971	-0.0080817	0.0166	-0.0156	-0.0033599	0.0198
3.8	-0.003839	0.0011849	-0.0073113	0.0193	-0.0161	-0.0015513	0.0182
3.9	-0.0033289	0.0017657	-0.0080817	0.0153	-0.0151	-0.0021543	0.0105
4	-0.0043596	0.0011849	-0.0112	0.0193	-0.0161	-0.0021543	0.0082826
4.1	-0.0017661	0.0017657	-0.0057379	0.0173	-0.0136	-0.0015513	0.0105
4.2	-0.003839	0.0023466	-0.0073113	0.0186	-0.0136	-0.0021543	0.0116
4.3	-0.001245	0.0029277	-0.0104	0.0133	-0.0146	-0.00035712	0.0093748
4.4	-0.0022872	0.0029277	-0.0049509	0.0146	-0.0141	-0.00096043	0.0116
4.5	-0.0022872	0.0034971	-0.0096542	0.0153	-0.0136	0.0014536	0.0138
4.6	-0.0033289	0.0023466	-0.0104	0.0113	-0.0126	-0.00035712	0.008823
4.7	-0.0043596	0.0058234	-0.0073113	0.0079666	-0.0121	-0.0015513	0.0082826
4.8	-0.0017661	0.0040784	-0.012	0.012	-0.0126	-0.0021543	0.0060772
4.9	-0.001245	0.0034971	-0.0104	0.0146	-0.0146	-0.0015513	0.0055261
5	-0.0017661	0.0040784	-0.0080817	0.016	-0.0131	-0.0033599	0.0016947
5.1	-0.0022872	0.0040784	-0.0104	0.0106	-0.0116	-0.0039625	0.0011413
5.2	-0.001245	0.0034971	-0.0104	0.0093	-0.0121	-0.00035712	0.0055261
5.3	-0.0017661	0.0034971	-0.0104	0.01	-0.0116	-0.0027572	0.0105
5.4	-0.00072365	0.0017657	-0.0136	0.0126	-0.0116	-0.0021543	0.011
5.5	0.00083036	0.0040784	-0.012	0.0113	-0.0111	-0.0027572	0.0116
5.6	-0.00072365	0.0040784	-0.0104	0.01	-0.0111	-0.0021543	0.0093748
5.7	-0.00021286	0.0029277	-0.0112	0.0113	-0.0111	-0.0015513	0.0121
5.8	-0.00072365	0.0058234	-0.0136	0.0106	-0.0126	-0.0015513	0.011
5.9	-0.00021286	0.0040784	-0.012	0.0133	-0.0121	-0.0015513	0.008823
6	-0.0022872	0.0064053	-0.0104	0.012	-0.0116	-0.00096043	0.0060772
6.1	0.00083036	0.0052416	-0.0112	0.0079666	-0.0121	-0.0021543	0.0044356
6.2	0.0034299	0.0069756	-0.0144	0.012	-0.0121	-0.0015513	0.0033344
6.3	-0.0017661	0.0058234	-0.0112	0.01	-0.0126	-0.00035712	0.0049864
6.4	-0.001245	0.00466	-0.0128	0.0079666	-0.0131	-0.00035712	0.008823
6.5	-0.001245	0.0052416	-0.0128	0.0113	-0.0106	-0.0015513	0.0082826
6.6	-0.00072365	0.0058234	-0.0104	0.0086339	-0.0121	-0.0033599	0.0082826
6.7	-0.0022872	0.00466	-0.0128	0.012	-0.0136	-0.00096043	0.008823
6.8	-0.0022872	0.0029277	-0.0112	0.0106	-0.0126	-0.00096043	0.0060772
6.9	-0.00021286	0.00466	-0.012	0.0079666	-0.0121	0.00024632	0.0060772
7	0.0013522	0.0040784	-0.0128	0.01	-0.0126	-0.0015513	0.003885
7.1	0.00083036	0.0058234	-0.0128	0.012	-0.0126	-0.0033599	0.0022337
7.2	0.0013522	0.0040784	-0.0128	0.01	-0.0121	-0.00035712	0.00059245
7.3	0.0018741	0.0052416	-0.0136	0.0126	-0.0101	-0.0027572	0.0011413
7.4	0.00030869	0.0052416	-0.0144	0.0146	-0.0111	-0.0027572	0.0022337
7.5	0.0018741	0.0064053	-0.0167	0.0133	-0.0111	-0.00035712	0.0033344
7.6	0.0013522	0.0034971	-0.0151	0.0106	-0.0111	-0.0021543	0.00059245
7.7	0.00030869	0.0052416	-0.0167	0.014	-0.0101	-0.00096043	0.00059245
7.8	0.0023961	0.00466	-0.0183	0.0086339	-0.0106	-0.0027572	-0.00050369
7.9	0.00083036	0.0029277	-0.0151	0.0106	-0.0111	-0.00035712	-0.0026934
8	0.0013522	0.0029277	-0.0159	0.0126	-0.0106	-0.0027572	-0.0048823
8.1	0.0013522	0.0023466	-0.0167	0.0113	-0.0090449	-0.00096043	-0.001051
8.2	0.0018741	0.0011849	-0.0167	0.0126	-0.009551	-0.00096043	4.4878e-05
8.3	0.0023961	0.00060421	-0.0151	0.0113	-0.0106	-0.0021543	0.00059245
8.4	0.0013522	0.0011849	-0.0159	0.0079666	-0.0106	-0.00096043	-0.00050369
8.5	-0.001245	0.0023466	-0.0167	0.0113	-0.0090449	-0.0027572	0.00059245
8.6	0.00083036	0.00060421	-0.0128	0.0093	-0.0111	0.00084991	-0.00050369
8.7	-0.001245	0.0011849	-0.0151	0.01	-0.0065233	-0.00096043	0.00059245
8.8	0.00030869	0.0029277	-0.0159	0.0086339	-0.0045061	-0.00035712	-0.0026934
8.9	0.00083036	2.3692e-05	-0.0159	0.0059684	-0.0065233	-0.0015513	-0.00050369
9	0.0018741	0.0017657	-0.012	0.0053031	-0.0080428	0.00024632	0.00059245
9.1	0.00083036	0.0011849	-0.0136	0.0059684	-0.0039989	-0.0021543	0.00059245
9.2	0.00083036	0.0029277	-0.0144	0.0073008	-0.0055097	0.00084991	0.00059245
9.3	0.00030869	0.0011849	-0.0128	0.0039717	-0.0075364	-0.0015513	4.4878e-05
9.4	-0.00072365	0.0023466	-0.0151	0.0046366	-0.0080428	0.00084991	-0.00050369
9.5	-0.001245	0.0029277	-0.0128	0.0053031	-0.0085387	-0.0015513	0.0016947
9.6	-0.00072365	0.0034971	-0.012	0.0026408	-0.0090449	-0.00035712	0.00059245
9.7	-0.00021286	0.0017657	-0.0136	0.0066352	-0.0034917	-0.00096043	0.00059245
9.8	-0.001245	0.0052416	-0.0104	0.0066352	-0.0029843	-0.00096043	0.0011413
9.9	-0.00072365	0.00466	-0.0104	0.0066352	-0.0045061	-0.00035712	-0.0021464
10	-0.00072365	0.0023466	-0.0128	0.0073008	-0.0045061	0.0014536	-0.0015982
10.1	-0.00021286	0.0029277	-0.0104	0.0046366	-0.0050131	-0.00096043	-0.001051
10.2	-0.001245	0.00466	-0.008868	0.0019763	-0.0039989	0.0014536	-0.0015982
10.3	-0.00021286	0.0040784	-0.0144	0.0046366	-0.0050131	0.0014536	-0.00050369
10.4	-0.00072365	0.0052416	-0.0104	0.0026408	-0.0070299	0.0038577	-0.00050369
10.5	-0.001245	0.0034971	-0.0080817	0.0013106	-0.0065233	0.0038577	4.4878e-05
10.6	-0.00021286	0.0017657	-0.0112	0.0046366	-0.0055097	-0.0015513	-0.00050369
10.7	-0.00072365	0.0029277	-0.0096542	0.0066352	-0.0060165	0.00024632	-0.00050369
10.8	-0.00072365	2.3692e-05	-0.0080817	0.0033068	-0.0070299	0.0032534	-0.00050369
10.9	-0.0017661	0.00060421	-0.0104	0.0053031	-0.0065233	0.0020575	4.4878e-05
11	0.0023961	2.3692e-05	-0.0080817	0.0066352	-0.0075364	0.0026492	-0.00050369
11.1	0.0018741	-0.0011251	-0.0041637	0.0039717	-0.0060165	0.0020575	-0.0032414
11.2	0.0029076	0.0011849	-0.008868	0.0039717	-0.0055097	0.0038577	-0.0015982
11.3	0.0023961	0.0017657	-0.0057379	0.0013106	-0.0045061	0.0032534	-0.0026934
11.4	0.0029076	0.00060421	-0.0041637	0.00064636	-0.0045061	0.0044621	-0.0015982
11.5	0.0018741	0.0029277	-0.0049509	-1.7688e-05	-0.0045061	0.0056715	-0.0021464
11.6	0.00083036	0.00060421	-0.0049509	0.0046366	-0.0039989	0.0020575	-0.00050369
11.7	0.0018741	2.3692e-05	-0.0041637	-1.7688e-05	-0.0065233	0.0020575	-0.0021464
11.8	0.00083036	-0.0017052	-0.0057379	0.0013106	-0.0039989	0.0032534	-0.0032414
11.9	0.00030869	-0.00054484	-0.0049509	0.0033068	-0.0039989	0.00084991	-0.0026934
12	0.0013522	-0.0011251	-0.0049509	-1.7688e-05	-0.0034917	0.0014536	-0.0021464
12.1	0.0013522	-0.0017052	-0.0073113	0.0013106	-0.0039989	-0.00096043	-0.0015982
12.2	0.0023961	2.3692e-05	-0.0057379	0.0019763	-0.0039989	-0.00035712	-0.0021464
12.3	0.00083036	-0.0022851	-0.0073113	-0.002675	-0.0034917	0.00024632	4.4878e-05
12.4	0.0029076	-0.0028649	-0.0104	-0.00068294	-0.0024768	-0.00096043	0.003885
12.5	0.0034299	-0.0011251	-0.0041637	-1.7688e-05	-0.0019796	0.0014536	0.0049864
12.6	0.0018741	-0.0034446	-0.0080817	-0.002675	-0.00096409	0.0014536	0.00059245
12.7	0.0039523	-0.0022851	-0.008868	-1.7688e-05	-0.0024768	0.00024632	0.0016947
12.8	0.0029076	-0.0028649	-0.0041637	0.00064636	-0.0024768	-0.00096043	0.0016947
12.9	0.0034299	-0.0022851	-0.0080817	-1.7688e-05	-0.0029843	-0.0015513	0.0011413
13	0.0023961	-0.0028649	-0.0073113	-0.0013467	-0.0019796	0.00084991	0.0044356
13.1	0.0029076	-0.0022851	-0.0049509	0.0013106	-0.0024768	0.00084991	0.002784
13.2	0.0044748	-0.0034446	-0.0033763	0.0019763	-0.0019796	0.00024632	0.00059245
13.3	0.0039523	-0.0011251	-0.0041637	-1.7688e-05	-0.0024768	0.0020575	0.0016947
13.4	0.0039523	-0.0011251	-0.0041637	0.0013106	-0.0024768	0.0020575	0.003885
13.5	0.0049975	-0.0017052	-0.0010293	-0.00068294	-0.0014719	0.0014536	0.002784
13.6	0.0034299	-0.0028649	-0.0033763	-0.0033383	-0.0045061	-0.0021543	4.4878e-05
13.7	0.0049975	-0.0028649	-0.0018172	0.0013106	-0.0039989	-0.0027572	0.0022337
13.8	0.0096856	-0.0045917	-0.0033763	0.0033068	-0.0024768	-0.0027572	-0.00050369
13.9	0.0096856	-0.0022851	-0.0049509	-1.7688e-05	-0.0019796	-0.0015513	0.0033344
14	0.0029076	-0.0022851	-0.0010293	0.0026408	0.0010578	-0.0015513	0.0011413
14.1	-0.0017661	-0.0028649	-0.00024127	0.0026408	-0.00045618	0.0014536	0.0011413
14.2	-0.0028081	-0.0011251	-0.0049509	0.00064636	-0.0029843	-0.0015513	0.0016947
14.3	0.0013522	-0.0040241	0.0013353	-1.7688e-05	-0.0014719	-0.0033599	0.002784
14.4	0.0055203	-0.00054484	0.0028966	0.00064636	-0.0039989	-0.0015513	0.0044356
14.5	0.0018741	-0.0017052	0.0013353	0.0013106	-0.0050131	0.00084991	0.0022337
14.6	0.0013522	-0.0011251	0.0021239	-0.002675	-0.0014719	-0.00096043	-0.00050369
14.7	0.0044748	-0.0017052	0.00054695	-0.00068294	5.1844e-05	-0.00096043	-0.001051
14.8	0.0039523	-0.00054484	-0.00024127	0.0039717	0.00055997	-0.0021543	4.4878e-05
14.9	0.0049975	2.3692e-05	-0.00024127	-1.7688e-05	0.0020746	-0.0015513	0.00059245
15	0.0049975	-0.0028649	0.00054695	-1.7688e-05	-0.00096409	0.00084991	0.0011413
15.1	0.0034299	-0.0028649	-0.0010293	-0.0013467	-0.0039989	0.0020575	0.00059245
15.2	0.0034299	-0.0040241	0.00054695	-0.0040028	-0.0034917	0.0020575	0.002784
15.3	0.0044748	-0.00054484	0.0021239	-0.0013467	-0.0014719	0.00024632	4.4878e-05
15.4	0.0039523	-0.00054484	0.00054695	-1.7688e-05	-0.0029843	-0.0021543	0.0011413
15.5	0.0023961	-0.0022851	-0.00024127	-0.0033383	-0.0024768	-0.00035712	0.0016947
15.6	0.0023961	-0.0040241	0.0028966	-0.0020116	-0.0014719	-0.0015513	0.0022337
15.7	0.0039523	-0.0034446	0.0013353	0.00064636	-0.00045618	-0.00035712	4.4878e-05
15.8	0.0039523	-0.0028649	-0.0026049	-0.0040028	0.0015662	-0.0027572	-0.0037881
15.9	0.0034299	-0.0051709	-0.00024127	0.0013106	0.0020746	-0.0021543	-0.0026934
16	-0.00021286	-0.0040241	0.0021239	-0.0020116	0.0025832	0.0020575	-0.0021464
16.1	0.0023961	-0.0034446	-0.00024127	-0.002675	0.0010578	0.0014536	-0.001051
16.2	0.0029076	-0.0011251	0.00054695	-1.7688e-05	0.0020746	0.00024632	-0.0015982
16.3	0.0055203	-0.0017052	0.00054695	-0.0020116	0.00055997	0.0014536	-0.0048823
16.4	0.0044748	-0.0034446	-0.00024127	-0.0013467	0.0020746	0.0026492	-0.0021464
16.5	0.0034299	-0.0011251	0.0013353	0.0033068	0.0020746	0.0020575	-0.0026934
16.6	0.0034299	-0.0011251	0.0013353	0.00064636	0.0015662	0.0020575	-0.0037881
16.7	0.0049975	-0.0017052	0.0013353	0.00064636	0.0015662	0.0020575	-0.0037881
16.8	0.0039523	-0.0034446	0.0044746	0.0013106	0.0015662	0.00084991	-0.0026934
16.9	0.0049975	-0.0017052	0.0052639	0.0019763	0.0015662	-0.00096043	-0.0015982
17	0.0044748	-0.0022851	0.0044746	-0.0013467	0.0010578	-0.0015513	-0.0032414
17.1	0.0055203	-0.0011251	0.0068429	0.00064636	0.0030919	-0.0015513	-0.00050369
17.2	0.0039523	-0.0040241	0.0036855	0.0013106	0.0020746	-0.00035712	-0.001051
17.3	0.0055203	-0.0017052	0.0052639	-0.0020116	0.0046082	-0.0015513	-0.0015982
17.4	0.0055203	-0.0040241	0.0036855	-0.00068294	0.0030919	-0.00035712	-0.0043347
17.5	0.0044748	-0.0017052	0.00054695	-1.7688e-05	0.0030919	0.0014536	-0.0032414
17.6	0.0034299	-0.0028649	0.0044746	0.0019763	0.0041095	-0.0015513	-0.0043347
17.7	0.0034299	-0.0051709	0.0036855	0.00064636	0.0041095	-0.00035712	-0.00050369
17.8	0.0034299	-0.0022851	0.0013353	-0.0013467	0.0036007	-0.00096043	-0.0015982
17.9	0.0029076	-0.0017052	0.0044746	-1.7688e-05	0.0030919	-0.0015513	-0.0021464
18	0.0018741	-0.0028649	0.0036855	-1.7688e-05	0.0041095	-0.00035712	-0.001051
18.1	0.0039523	-0.0074864	0.0021239	0.0059684	0.0051173	-0.00035712	-0.0015982
18.2	0.0034299	-0.0069078	0.0036855	-1.7688e-05	0.0046082	0.00084991	-0.0021464
18.3	0.0034299	-0.0051709	0.0044746	-0.0040028	0.0041095	0.0014536	-0.0026934
18.4	0.0044748	-0.00575	0.0021239	0.00064636	0.0056265	0.00084991	-0.0021464
18.5	0.0044748	-0.0034446	0.0036855	0.0026408	0.0025832	-0.00096043	-0.0015982
18.6	0.0065555	-0.00575	0.0044746	-0.002675	0.0061358	-0.00096043	-0.0032414
18.7	0.007602	-0.0069078	0.0013353	0.0026408	0.0056265	0.0026492	-0.001051
18.8	0.0091725	-0.0080532	0.0021239	0.0033068	0.0061358	0.0050667	-0.0026934
18.9	0.0086489	-0.006329	0.0044746	0.0013106	0.0066452	0.0050667	-0.0015982
19	0.0091725	-0.00575	0.00054695	0.0039717	0.0041095	0.0056715	-0.0021464
19.1	0.0091725	-0.006329	0.0021239	0.0039717	0.0030919	0.006869	-0.0032414
19.2	0.0096856	-0.0022851	0.0052639	0.0039717	0.00055997	0.008685	-0.0015982
19.3	0.0118	-0.0011251	0.00054695	0.0073008	-0.00096409	0.0105	0.0022337
19.4	0.0154	0.00060421	0.0044746	0.0066352	-0.00096409	0.0129	-0.00050369
19.5	0.016	0.0011849	0.0028966	0.0053031	-0.0024768	0.0159	-0.0026934
19.6	0.0144	-0.0011251	0.0021239	0.0053031	-0.0019796	0.0172	-0.001051
19.7	0.0123	-0.0011251	0.0028966	0.0019763	0.00055997	0.0208	-0.001051
19.8	0.0128	-0.0011251	0.0044746	0.0013106	5.1844e-05	0.0287	-0.00050369
19.9	0.0107	-0.0051709	-0.00024127	0.0013106	-0.00096409	0.0305	-0.00050369
20	0.0107	-0.0069078	0.0021239	0.0013106	0.00055997	0.0366	-0.0021464
20.1	0.0113	-0.0069078	0.0052639	-1.7688e-05	0.0015662	0.0372	-0.0021464
20.2	0.0133	-0.00575	0.0028966	0.0019763	0.0020746	0.0403	0.0016947
20.3	0.0181	-0.00575	0.0028966	-1.7688e-05	0.00055997	0.039	0.0033344
20.4	0.0149	-0.0086315	0.0060533	0.0013106	0.00055997	0.0335	0.0011413
20.5	0.017	-0.0069078	0.0036855	0.00064636	-0.00045618	0.0329	-0.001051
20.6	0.0191	-0.0034446	0.0044746	0.00064636	-0.0014719	0.0317	0.0033344
20.7	0.0186	-0.0045917	0.0060533	-0.0013467	-0.0039989	0.0317	0.0044356
20.8	0.0175	-0.0045917	0.0028966	-0.00068294	5.1844e-05	0.0329	0.0071796
20.9	0.0181	-0.0034446	0.0036855	-0.0013467	-0.00045618	0.0329	0.003885
21	0.0233	-0.0040241	0.0068429	-0.0020116	0.0010578	0.0354	0.002784
21.1	0.0244	-0.0051709	0.0052639	-0.0033383	0.0020746	0.0409	0.0011413
21.2	0.0249	-0.00575	0.0091967	-1.7688e-05	0.0015662	0.039	4.4878e-05
21.3	0.0249	-0.00575	0.0108	-1.7688e-05	0.0015662	0.0415	0.0055261
21.4	0.0265	-0.0051709	0.0068429	-1.7688e-05	0.0030919	0.0415	0.0082826
21.5	0.027	-0.0045917	0.0084066	-0.00068294	0.0036007	0.0378	0.0093748
21.6	0.0301	-0.0022851	0.0091967	-1.7688e-05	0.0041095	0.0409	0.003885
21.7	0.0296	2.3692e-05	0.0084066	-0.0013467	0.0030919	0.0464	0.00059245
21.8	0.0301	-0.0028649	0.0076166	0.00064636	0.0030919	0.0488	0.0016947
21.9	0.0312	-0.0040241	0.0091967	0.0019763	0.0041095	0.0501	0.0016947
22	0.0365	-0.0051709	0.0044746	0.0026408	0.0046082	0.0513	-0.001051
22.1	0.0391	-0.0051709	0.0068429	0.0026408	0.0041095	0.0525	0.0011413
22.2	0.0386	-0.0040241	0.0076166	0.0053031	0.0066452	0.0556	0.002784
22.3	0.0375	-0.0022851	0.0044746	0.0086339	0.0081638	0.0587	0.0066283
22.4	0.0375	-0.00054484	0.0052639	0.0113	0.0086737	0.0587	0.0055261
22.5	0.0402	2.3692e-05	0.0060533	0.014	0.0091836	0.0611	0.0055261
22.6	0.0439	0.0011849	0.0044746	0.0093	0.0091836	0.0642	0.0016947
22.7	0.0439	0.0023466	0.0068429	0.0126	0.0112	0.0685	0.0044356
22.8	0.0434	0.0163	0.0060533	0.0153	0.0133	0.0698	0.003885
22.9	0.0439	0.021	0.0028966	0.0133	0.0117	0.0704	0.0044356
23	0.0423	0.0163	0.0060533	0.0126	0.0096937	0.0747	0.0044356
23.1	0.0455	0.0186	0.0091967	0.0166	0.0102	0.0753	0.003885
23.2	0.0508	0.0192	0.0052639	0.0146	0.0107	0.0778	0.0022337
23.3	0.0492	0.0192	0.0076166	0.016	0.0112	0.0797	0.00059245
23.4	0.0497	0.0169	0.0068429	0.0213	0.0122	0.079	0.0011413
23.5	0.0524	0.0186	0.0060533	0.0227	0.0127	0.0797	0.0033344
23.6	0.054	0.0169	0.0060533	0.022	0.0163	0.0828	0.0022337
23.7	0.0566	0.0145	0.0091967	0.0247	0.0158	0.089	0.0033344
23.8	0.0551	0.0134	0.0076166	0.0247	0.0153	0.0927	0.0044356
23.9	0.0588	0.0105	0.0076166	0.0233	0.0163	0.0927	0.0033344
24	0.0604	0.0098881	0.0084066	0.0213	0.0184	0.0958	0.0033344
24.1	0.0609	0.0105	0.0091967	0.0213	0.0178	0.0977	0.003885
24.2	0.0625	0.0098881	0.0084066	0.0227	0.0173	0.099	0.0060772
24.3	0.0636	0.0105	0.0084066	0.0173	0.0173	0.0996	0.0044356
24.4	0.0636	0.0128	0.0076166	0.0193	0.0173	0.1046	0.0049864
24.5	0.0647	0.0122	0.0091967	0.0213	0.0204	0.1052	0.0033344
24.6	0.0663	0.014	0.0076166	0.022	0.0199	0.1046	0.0033344
24.7	0.0652	0.0122	0.0108	0.0227	0.0204	0.1102	0.0055261
24.8	0.0673	0.011	0.0068429	0.0267	0.0224	0.1146	0.003885
24.9	0.0684	0.0128	0.0068429	0.0247	0.0219	0.1165	0.008823
25	0.0695	0.011	0.0108	0.026	0.0214	0.1178	0.0082826
25.1	0.0684	0.0093053	0.0091967	0.0287	0.0235	0.1222	0.0071796
25.2	0.07	0.0128	0.01	0.026	0.0255	0.1222	0.0071796
25.3	0.0716	0.014	0.0131	0.026	0.0255	0.1228	0.0093748
25.4	0.0732	0.0122	0.0108	0.0253	0.026	0.1235	0.0105
25.5	0.0722	0.0105	0.01	0.024	0.027	0.1266	0.011
25.6	0.0754	0.0157	0.0147	0.0253	0.026	0.1292	0.016
25.7	0.077	0.0145	0.0116	0.0314	0.027	0.1292	0.0182
25.8	0.0792	0.0128	0.0147	0.0307	0.0286	0.1342	0.0171
25.9	0.0802	0.0151	0.0171	0.0294	0.0286	0.1393	0.0198
26	0.0824	0.011	0.0139	0.0321	0.0281	0.1412	0.0204
26.1	0.0835	0.0087227	0.0139	0.0294	0.0286	0.1399	0.0215
26.2	0.084	0.0122	0.0179	0.0314	0.0301	0.1437	0.0232
26.3	0.0856	0.014	0.0131	0.0327	0.0296	0.1456	0.0237
26.4	0.0889	0.0186	0.0163	0.0274	0.0291	0.1507	0.027
26.5	0.0889	0.0186	0.0187	0.03	0.0301	0.1507	0.027
26.6	0.0889	0.0175	0.0179	0.03	0.0327	0.1539	0.0293
26.7	0.0883	0.0163	0.0147	0.0294	0.0317	0.1578	0.0293
26.8	0.0883	0.0145	0.0187	0.0294	0.0332	0.1597	0.0293
26.9	0.0899	0.0157	0.0179	0.026	0.0337	0.1578	0.0282
27	0.0916	0.0163	0.0163	0.0287	0.0337	0.161	0.0298
27.1	0.0964	0.018	0.0187	0.0314	0.0342	0.1674	0.0309
27.2	0.097	0.0163	0.0163	0.0321	0.0353	0.1648	0.0293
27.3	0.0959	0.018	0.0155	0.0274	0.0347	0.1699	0.0287
27.4	0.0954	0.0175	0.0179	0.028	0.0353	0.1706	0.0298
27.5	0.0932	0.0175	0.0163	0.028	0.0353	0.1699	0.0259
27.6	0.0997	0.0192	0.0155	0.0267	0.0363	0.1718	0.0237
27.7	0.1002	0.0175	0.0195	0.028	0.0368	0.1712	0.0215
27.8	0.1019	0.0198	0.0139	0.0307	0.0373	0.1725	0.0237
27.9	0.1019	0.0204	0.021	0.0294	0.0389	0.1751	0.0248
28	0.1035	0.0215	0.021	0.0287	0.0389	0.1783	0.0254
28.1	0.1062	0.0227	0.0187	0.0274	0.0399	0.1796	0.0265
28.2	0.1051	0.0227	0.0218	0.026	0.0389	0.1809	0.0304
28.3	0.1041	0.0227	0.0242	0.0307	0.0394	0.1815	0.0293
28.4	0.11	0.0227	0.0195	0.0287	0.0394	0.1828	0.0243
28.5	0.1117	0.0227	0.0218	0.0314	0.0404	0.1847	0.0198
28.6	0.11	0.0233	0.0234	0.0361	0.0414	0.186	0.0215
28.7	0.1106	0.0215	0.0218	0.0341	0.0419	0.1899	0.0237
28.8	0.109	0.0227	0.021	0.0354	0.0414	0.1912	0.0265
28.9	0.1117	0.0239	0.0226	0.0347	0.0425	0.1912	0.0259
29	0.1128	0.0256	0.021	0.0341	0.0435	0.1931	0.0259
29.1	0.1122	0.0245	0.021	0.0361	0.0435	0.1957	0.0248
29.2	0.1117	0.025	0.0234	0.0374	0.045	0.197	0.0232
29.3	0.1133	0.0262	0.0218	0.0381	0.044	0.1964	0.0259
29.4	0.1139	0.0245	0.0234	0.0395	0.0481	0.1977	0.0282
29.5	0.1172	0.0256	0.0242	0.0381	0.0476	0.197	0.032
29.6	0.1188	0.025	0.0234	0.0368	0.0481	0.199	0.0304
29.7	0.1172	0.028	0.0218	0.0388	0.0487	0.2003	0.0276
29.8	0.1166	0.0274	0.0218	0.0388	0.0481	0.2035	0.027
29.9	0.1188	0.0268	0.0242	0.0374	0.0487	0.2048	0.0265
30	0.1199	0.0286	0.0234	0.0401	0.0481	0.2048	0.0254
30.1	0.1194	0.0274	0.0202	0.0408	0.0492	0.2087	0.027
30.2	0.1221	0.0286	0.0234	0.0395	0.0492	0.2094	0.0282
30.3	0.1243	0.0303	0.0226	0.0401	0.0507	0.2094	0.0293
30.4	0.127	0.0309	0.0234	0.0422	0.0533	0.212	0.0315
30.5	0.1243	0.0268	0.0202	0.0415	0.0533	0.2107	0.0348
30.6	0.1237	0.028	0.0242	0.0388	0.0528	0.212	0.0348
30.7	0.127	0.0286	0.0218	0.0388	0.0533	0.2113	0.037
30.8	0.1292	0.0274	0.0226	0.0381	0.0533	0.2126	0.0315
30.9	0.1292	0.028	0.0202	0.0408	0.0543	0.2146	0.0298
31	0.1292	0.0291	0.0226	0.0428	0.0533	0.2146	0.0287
31.1	0.1298	0.0291	0.0218	0.0422	0.0559	0.2178	0.0309
31.2	0.1331	0.0315	0.021	0.0449	0.0559	0.2172	0.0309
31.3	0.1347	0.0303	0.0234	0.0455	0.0564	0.2185	0.0315
31.4	0.1336	0.0326	0.0202	0.0422	0.0569	0.2198	0.0326
31.5	0.1314	0.0315	0.025	0.0482	0.0585	0.2211	0.0331
31.6	0.1331	0.0332	0.025	0.0476	0.0595	0.2211	0.0331
31.7	0.1342	0.0326	0.0242	0.0489	0.0585	0.2231	0.0354
31.8	0.1392	0.0321	0.025	0.0482	0.059	0.2264	0.0354
31.9	0.1403	0.0326	0.0258	0.0516	0.0606	0.2277	0.0343
32	0.1403	0.0326	0.0242	0.0496	0.06	0.2283	0.0365
32.1	0.1392	0.0309	0.0258	0.0503	0.06	0.229	0.0348
32.2	0.1419	0.0309	0.0274	0.0557	0.0621	0.229	0.0365
32.3	0.143	0.035	0.0289	0.0509	0.0621	0.2309	0.0393
32.4	0.1452	0.0344	0.0258	0.0509	0.0606	0.2303	0.0387
32.5	0.1452	0.0326	0.0274	0.0543	0.06	0.2323	0.0393
32.6	0.148	0.0344	0.0242	0.0523	0.0621	0.2342	0.0381
32.7	0.1464	0.0338	0.0258	0.055	0.0611	0.2336	0.0387
32.8	0.1502	0.0356	0.0274	0.0523	0.0632	0.2342	0.0376
32.9	0.1497	0.0356	0.0234	0.0516	0.0626	0.2375	0.0398
33	0.1508	0.0373	0.0258	0.0509	0.0647	0.2362	0.0404
33.1	0.1508	0.035	0.0274	0.0536	0.0637	0.2369	0.042
33.2	0.153	0.0362	0.0258	0.0503	0.0658	0.2428	0.042
33.3	0.1525	0.0379	0.0274	0.0523	0.0668	0.2448	0.0432
33.4	0.1519	0.0379	0.0274	0.055	0.0663	0.2434	0.0443
33.5	0.1541	0.0409	0.025	0.0523	0.0663	0.2448	0.0437
33.6	0.1564	0.0409	0.0202	0.053	0.0663	0.2474	0.0454
33.7	0.1558	0.0421	0.0266	0.053	0.0658	0.2494	0.0448
33.8	0.1564	0.0403	0.0258	0.0496	0.0647	0.25	0.0454
33.9	0.1569	0.0426	0.025	0.0496	0.0668	0.2474	0.0432
34	0.158	0.0426	0.0266	0.0509	0.0673	0.2507	0.0432
34.1	0.1586	0.0403	0.0266	0.055	0.0673	0.252	0.0409
34.2	0.1591	0.0432	0.0281	0.0536	0.0699	0.2507	0.0404
34.3	0.1625	0.0397	0.0274	0.0543	0.0689	0.2527	0.0415
34.4	0.1603	0.0432	0.0305	0.057	0.0689	0.254	0.0415
34.5	0.1614	0.0432	0.0297	0.057	0.0684	0.2553	0.0409
34.6	0.1647	0.0421	0.0297	0.0536	0.0699	0.2553	0.0409
34.7	0.1653	0.0438	0.0305	0.0577	0.0705	0.256	0.0432
34.8	0.1653	0.0438	0.0297	0.055	0.0705	0.258	0.0448
34.9	0.1675	0.0456	0.0281	0.0543	0.0705	0.2587	0.0432
35	0.1686	0.0444	0.0313	0.0577	0.0736	0.2593	0.0432
35.1	0.1681	0.0468	0.0289	0.0577	0.0725	0.2613	0.0432
35.2	0.1681	0.0456	0.0313	0.0604	0.0731	0.262	0.0471
35.3	0.1698	0.0491	0.0345	0.0604	0.0731	0.2633	0.0454
35.4	0.1675	0.0503	0.0321	0.057	0.0751	0.2633	0.0476
35.5	0.1709	0.0479	0.0337	0.0557	0.0751	0.2659	0.0499
35.6	0.1709	0.0497	0.0329	0.0591	0.0757	0.2673	0.046
35.7	0.1731	0.0503	0.0321	0.0591	0.0762	0.2666	0.0448
35.8	0.172	0.0503	0.0329	0.055	0.0751	0.2673	0.0476
35.9	0.1737	0.0485	0.0313	0.0543	0.0757	0.2699	0.0487
36	0.1742	0.0509	0.0313	0.0577	0.0746	0.2686	0.0499
36.1	0.1742	0.0533	0.0369	0.057	0.0778	0.2719	0.0487
36.2	0.177	0.0527	0.0345	0.0577	0.0772	0.2713	0.0482
36.3	0.1782	0.0539	0.0329	0.0611	0.0783	0.2719	0.0465
36.4	0.1776	0.0527	0.0353	0.0577	0.0793	0.2733	0.0465
36.5	0.1776	0.0539	0.0361	0.0591	0.0799	0.2753	0.0487
36.6	0.1787	0.0533	0.0345	0.0604	0.0814	0.2759	0.0482
36.7	0.181	0.0539	0.0353	0.0577	0.0804	0.2766	0.0487
36.8	0.1793	0.0545	0.0361	0.0543	0.0809	0.2773	0.0487
36.9	0.1815	0.0527	0.0321	0.057	0.0809	0.2786	0.0499
37	0.1827	0.0545	0.0361	0.0584	0.0799	0.2779	0.0527
37.1	0.1844	0.0545	0.0337	0.057	0.0809	0.2779	0.056
37.2	0.1827	0.0539	0.0353	0.057	0.0804	0.2793	0.056
37.3	0.186	0.055	0.0369	0.0591	0.0835	0.2826	0.0549
37.4	0.186	0.0521	0.0361	0.0584	0.0841	0.2813	0.0543
37.5	0.1866	0.0568	0.0361	0.0604	0.0856	0.2826	0.0549
37.6	0.1866	0.0545	0.0361	0.0618	0.0856	0.284	0.0549
37.7	0.1883	0.0556	0.0345	0.0591	0.0872	0.2846	0.0555
37.8	0.1906	0.0604	0.0369	0.0604	0.0867	0.2826	0.0532
37.9	0.1872	0.0633	0.0353	0.0611	0.0856	0.2853	0.0521
38	0.1906	0.0586	0.0353	0.0604	0.0872	0.286	0.056
38.1	0.1906	0.0633	0.0385	0.0611	0.0861	0.2846	0.0594
38.2	0.1928	0.0651	0.0401	0.0618	0.0893	0.284	0.0594
38.3	0.1928	0.0651	0.0408	0.0631	0.0877	0.2833	0.0594
38.4	0.1911	0.0639	0.0432	0.0638	0.0888	0.2873	0.0599
38.5	0.1951	0.0681	0.0401	0.0652	0.0893	0.29	0.0605
38.6	0.1945	0.0681	0.0393	0.0652	0.0893	0.288	0.0599
38.7	0.1956	0.0675	0.0416	0.0665	0.0904	0.2886	0.0599
38.8	0.1962	0.0705	0.0393	0.0659	0.0914	0.2893	0.0622
38.9	0.1973	0.0687	0.0385	0.0672	0.0904	0.288	0.0622
39	0.1956	0.0699	0.0456	0.0631	0.0909	0.2886	0.0622
39.1	0.1973	0.0693	0.0401	0.0659	0.0919	0.2907	0.0628
39.2	0.1973	0.0645	0.0385	0.0659	0.0904	0.2907	0.0628
39.3	0.1996	0.0699	0.0416	0.0645	0.0919	0.2907	0.0622
39.4	0.1996	0.0705	0.0393	0.0638	0.093	0.29	0.0616
39.5	0.1985	0.0717	0.0377	0.0665	0.0946	0.2913	0.0639
39.6	0.2002	0.0705	0.044	0.0665	0.0946	0.2933	0.0644
39.7	0.1996	0.0723	0.0416	0.0665	0.0956	0.294	0.0639
39.8	0.1996	0.0723	0.0408	0.0679	0.0961	0.2954	0.0639
39.9	0.2036	0.0717	0.0393	0.0659	0.0946	0.2974	0.0622
40	0.2024	0.0735	0.0393	0.0645	0.0951	0.2974	0.0611
40.1	0.2024	0.0735	0.0432	0.0665	0.0935	0.298	0.0566
40.2	0.2041	0.0759	0.0401	0.0645	0.0951	0.2994	0.056
40.3	0.2041	0.0747	0.0424	0.0638	0.0972	0.3007	0.0588
40.4	0.2041	0.0776	0.048	0.0659	0.0961	0.3027	0.0639
40.5	0.2059	0.0765	0.0456	0.0638	0.0977	0.3027	0.0628
40.6	0.2059	0.0782	0.0416	0.0631	0.0972	0.3034	0.0639
40.7	0.2081	0.0782	0.0424	0.0659	0.0993	0.3041	0.065
40.8	0.2087	0.0782	0.0424	0.0679	0.0982	0.3041	0.065
40.9	0.2064	0.0794	0.0401	0.0665	0.0982	0.3068	0.0661
41	0.2076	0.0818	0.0424	0.0693	0.1009	0.3061	0.0656
41.1	0.2098	0.0824	0.0472	0.0727	0.0998	0.3075	0.0644
41.2	0.2081	0.0824	0.044	0.0699	0.0988	0.3075	0.0639
41.3	0.2104	0.0824	0.044	0.0672	0.0988	0.3068	0.065
41.4	0.2104	0.083	0.0432	0.0686	0.0982	0.3061	0.0673
41.5	0.211	0.0836	0.0401	0.072	0.1004	0.3115	0.0667
41.6	0.2121	0.0824	0.0369	0.0713	0.0998	0.3115	0.0673
41.7	0.2138	0.086	0.0361	0.0706	0.1009	0.3095	0.065
41.8	0.2127	0.0878	0.0408	0.072	0.1025	0.3108	0.0633
41.9	0.215	0.0848	0.0385	0.0672	0.1004	0.3122	0.0628
42	0.2167	0.0866	0.0448	0.0713	0.1041	0.3122	0.065
42.1	0.2161	0.086	0.0464	0.072	0.1019	0.3122	0.0644
42.2	0.2178	0.0866	0.044	0.072	0.1041	0.3142	0.0667
42.3	0.2212	0.0872	0.0432	0.072	0.1041	0.3136	0.0656
42.4	0.2218	0.0812	0.044	0.074	0.1056	0.3136	0.0656
42.5	0.2224	0.0866	0.0408	0.074	0.1051	0.3142	0.0656
42.6	0.2218	0.0908	0.044	0.0733	0.1056	0.3156	0.0639
42.7	0.223	0.0896	0.0472	0.0768	0.1046	0.3163	0.0644
42.8	0.2235	0.089	0.0472	0.074	0.1062	0.3176	0.0639
42.9	0.2247	0.0938	0.0512	0.0727	0.1083	0.3176	0.065
43	0.2247	0.0926	0.048	0.0761	0.1093	0.3196	0.0661
43.1	0.2241	0.0926	0.0472	0.0747	0.1083	0.3169	0.0644
43.2	0.2247	0.0926	0.0496	0.074	0.1088	0.3217	0.065
43.3	0.2247	0.0956	0.0488	0.0768	0.1104	0.3224	0.0673
43.4	0.2258	0.0962	0.0488	0.0781	0.1099	0.3257	0.065
43.5	0.2264	0.0956	0.0496	0.0733	0.1115	0.3291	0.065
43.6	0.2281	0.0944	0.0496	0.0761	0.1104	0.3278	0.0667
43.7	0.2281	0.0962	0.052	0.0768	0.1099	0.3237	0.0678
43.8	0.2258	0.0968	0.0528	0.074	0.1109	0.3298	0.0684
43.9	0.2281	0.0962	0.0504	0.0774	0.1109	0.3325	0.0678
44	0.2298	0.0968	0.052	0.0768	0.1109	0.3312	0.0684
44.1	0.2316	0.0974	0.0552	0.0781	0.1131	0.3339	0.0706
44.2	0.2316	0.0993	0.0512	0.0774	0.1131	0.3305	0.0689
44.3	0.2316	0.0956	0.0552	0.0795	0.1131	0.3305	0.0695
44.4	0.2327	0.098	0.056	0.0774	0.1147	0.3325	0.0667
44.5	0.2333	0.0999	0.0544	0.0781	0.1147	0.3353	0.0673
44.6	0.2339	0.1005	0.052	0.0795	0.1157	0.3366	0.0678
44.7	0.2339	0.1005	0.0584	0.0774	0.1152	0.3359	0.0712
44.8	0.2373	0.1011	0.0544	0.0788	0.1168	0.3359	0.0723
44.9	0.2344	0.1017	0.0568	0.0774	0.1173	0.3359	0.0701
45	0.2362	0.0999	0.056	0.0747	0.1178	0.3359	0.0695
45.1	0.2367	0.098	0.0544	0.0774	0.1189	0.3359	0.0706
45.2	0.2379	0.1005	0.0544	0.0788	0.1168	0.3373	0.0718
45.3	0.2379	0.1017	0.0536	0.0754	0.1189	0.3359	0.0729
45.4	0.239	0.1035	0.0552	0.0809	0.1184	0.3359	0.0689
45.5	0.2385	0.1017	0.0544	0.0795	0.1189	0.3387	0.0673
45.6	0.2408	0.1029	0.0552	0.0795	0.1194	0.3407	0.0684
45.7	0.2413	0.1011	0.0552	0.0815	0.1194	0.338	0.0718
45.8	0.2419	0.1041	0.0552	0.0822	0.12	0.34	0.0718
45.9	0.2431	0.1041	0.0568	0.0815	0.121	0.3407	0.0718
46	0.2431	0.1029	0.0552	0.0815	0.121	0.3407	0.0695
46.1	0.2442	0.1035	0.0552	0.0822	0.1216	0.3435	0.0712
46.2	0.2436	0.1041	0.06	0.0836	0.12	0.3435	0.0689
46.3	0.2454	0.1083	0.0544	0.0843	0.121	0.3428	0.0689
46.4	0.2448	0.1071	0.0552	0.0836	0.1216	0.3455	0.0729
46.5	0.2471	0.1071	0.06	0.085	0.1221	0.3476	0.0763
46.6	0.246	0.1071	0.0536	0.087	0.1216	0.3455	0.0774
46.7	0.246	0.1089	0.0528	0.0836	0.1221	0.3455	0.0751
46.8	0.2494	0.1095	0.0568	0.0856	0.1226	0.3476	0.074
46.9	0.2489	0.1077	0.0536	0.085	0.1242	0.3482	0.074
47	0.25	0.1107	0.0544	0.085	0.1242	0.3482	0.0774
47.1	0.2489	0.1095	0.056	0.087	0.1242	0.3489	0.0791
47.2	0.2494	0.1095	0.056	0.087	0.1253	0.3503	0.0768
47.3	0.2517	0.1089	0.0576	0.0843	0.1237	0.3496	0.0785
47.4	0.25	0.1119	0.0568	0.0843	0.1253	0.351	0.0785
47.5	0.2512	0.1132	0.0552	0.0877	0.1258	0.3537	0.078
47.6	0.2512	0.1126	0.0568	0.087	0.1258	0.3537	0.0774
47.7	0.2506	0.1126	0.056	0.085	0.128	0.3537	0.0797
47.8	0.2506	0.1144	0.0568	0.0891	0.1274	0.3489	0.0791
47.9	0.2506	0.1138	0.056	0.0884	0.1269	0.3503	0.0791
48	0.2523	0.1083	0.0584	0.0877	0.1269	0.351	0.0791
48.1	0.2517	0.1126	0.0576	0.0891	0.1285	0.353	0.0785
48.2	0.2529	0.1162	0.0584	0.0925	0.1285	0.3558	0.0797
48.3	0.2541	0.1138	0.0576	0.0898	0.129	0.3544	0.0802
48.4	0.257	0.115	0.0576	0.0918	0.129	0.3558	0.0836
48.5	0.2558	0.1138	0.0584	0.0904	0.129	0.3578	0.0814
48.6	0.257	0.1132	0.0584	0.0891	0.129	0.3551	0.0797
48.7	0.2587	0.115	0.0576	0.0904	0.129	0.3544	0.0757
48.8	0.2587	0.1138	0.0632	0.0891	0.1317	0.3571	0.0763
48.9	0.2593	0.1168	0.064	0.0898	0.1296	0.3558	0.0751
49	0.2605	0.1156	0.06	0.0898	0.1312	0.3578	0.0768
49.1	0.261	0.1186	0.06	0.0884	0.1317	0.3571	0.0774
49.2	0.2634	0.1162	0.06	0.0925	0.1322	0.3592	0.0791
49.3	0.2639	0.118	0.0568	0.0946	0.1317	0.3599	0.0808
49.4	0.2622	0.1162	0.0592	0.0904	0.1328	0.3585	0.0791
49.5	0.2651	0.118	0.0616	0.0904	0.1333	0.3626	0.0808
49.6	0.2645	0.1162	0.0592	0.0939	0.1333	0.3613	0.0814
49.7	0.2657	0.1162	0.0584	0.0891	0.1338	0.3585	0.0819
49.8	0.2634	0.1162	0.0608	0.0939	0.1349	0.3613	0.0814
49.9	0.2645	0.1126	0.0616	0.0925	0.1344	0.362	0.0797
50	0.2674	0.1119	0.0608	0.0884	0.136	0.362	0.0802
50.1	0.268	0.1132	0.0632	0.0918	0.1365	0.3626	0.0797
50.2	0.2686	0.1119	0.0608	0.0918	0.136	0.3647	0.0808
50.3	0.2709	0.1144	0.0576	0.0918	0.1376	0.3661	0.0802
50.4	0.2703	0.1138	0.0608	0.0932	0.1392	0.3682	0.0791
50.5	0.2709	0.1138	0.064	0.0925	0.1381	0.3647	0.0791
50.6	0.2715	0.118	0.0616	0.0932	0.1387	0.3668	0.0831
50.7	0.2721	0.115	0.0584	0.0939	0.1392	0.3654	0.0848
50.8	0.2703	0.1174	0.0584	0.0939	0.1403	0.3654	0.0859
50.9	0.2715	0.1186	0.0584	0.0925	0.1403	0.364	0.0848
51	0.2727	0.1156	0.0584	0.0939	0.1403	0.3688	0.0814
51.1	0.2721	0.1186	0.0592	0.0932	0.1419	0.3668	0.0814
51.2	0.2739	0.1192	0.06	0.0925	0.143	0.3654	0.0814
51.3	0.2744	0.1217	0.0568	0.0987	0.1408	0.3654	0.0814
51.4	0.2739	0.1204	0.0608	0.0959	0.1424	0.3675	0.0802
51.5	0.275	0.1186	0.0632	0.0952	0.1419	0.3695	0.0814
51.6	0.2756	0.1235	0.0624	0.0966	0.143	0.3675	0.0802
51.7	0.2756	0.1198	0.0608	0.0994	0.1435	0.3668	0.0814
51.8	0.2733	0.1229	0.0664	0.0973	0.1435	0.3668	0.0785
51.9	0.2762	0.1253	0.064	0.0959	0.1424	0.3695	0.0802
52	0.2785	0.1259	0.0672	0.0973	0.1446	0.3695	0.0785
52.1	0.2785	0.1217	0.064	0.0959	0.1456	0.3702	0.0808
52.2	0.2779	0.1241	0.0656	0.0994	0.144	0.375	0.0797
52.3	0.2779	0.1253	0.0672	0.098	0.144	0.373	0.0797
52.4	0.2785	0.1271	0.0624	0.0966	0.1456	0.3695	0.0797
52.5	0.2791	0.1241	0.064	0.0959	0.1451	0.3702	0.0808
52.6	0.2791	0.1278	0.0664	0.0987	0.1451	0.3764	0.0814
52.7	0.2803	0.1217	0.0648	0.098	0.1451	0.3744	0.0842
52.8	0.2785	0.1247	0.064	0.0973	0.1446	0.3737	0.0842
52.9	0.2815	0.1229	0.068	0.0973	0.1456	0.3757	0.0848
53	0.2838	0.1247	0.0664	0.0973	0.1467	0.3757	0.0848
53.1	0.282	0.1259	0.0688	0.0973	0.1473	0.3778	0.0819
53.2	0.2838	0.1253	0.0704	0.0973	0.1483	0.3785	0.0819
53.3	0.2838	0.1265	0.0688	0.0994	0.1478	0.3792	0.0831
53.4	0.2844	0.1229	0.0664	0.1014	0.1483	0.3785	0.0836
53.5	0.2815	0.1265	0.0696	0.0987	0.1489	0.3757	0.0808
53.6	0.2838	0.1265	0.0664	0.1021	0.1494	0.3771	0.0802
53.7	0.2832	0.1278	0.0672	0.1007	0.1505	0.3785	0.0808
53.8	0.285	0.1284	0.0712	0.0994	0.1499	0.3799	0.0808
53.9	0.285	0.1271	0.0664	0.1014	0.151	0.3799	0.0808
54	0.2838	0.1259	0.0672	0.1021	0.151	0.3771	0.0819
54.1	0.285	0.1247	0.0688	0.1014	0.1526	0.3785	0.0853
54.2	0.2838	0.1271	0.0664	0.1069	0.1505	0.3827	0.0859
54.3	0.2873	0.1253	0.0664	0.1063	0.1526	0.3806	0.0853
54.4	0.2873	0.1259	0.0688	0.0994	0.151	0.3813	0.0859
54.5	0.2862	0.1265	0.0656	0.1021	0.1516	0.382	0.087
54.6	0.2873	0.1271	0.0672	0.1056	0.151	0.3827	0.0865
54.7	0.2879	0.1302	0.068	0.1049	0.1516	0.3833	0.0887
54.8	0.2891	0.1284	0.064	0.1021	0.1526	0.3861	0.0887
54.9	0.2891	0.1271	0.0664	0.1097	0.1532	0.3882	0.0853
55	0.2885	0.1302	0.0648	0.1069	0.1526	0.3854	0.0882
55.1	0.2891	0.129	0.0608	0.1042	0.1543	0.382	0.0904
55.2	0.2885	0.1259	0.0632	0.1035	0.1543	0.3854	0.0876
55.3	0.2909	0.1278	0.0664	0.1001	0.1532	0.3875	0.0887
55.4	0.2909	0.1271	0.0656	0.1014	0.1553	0.3868	0.0893
55.5	0.2914	0.1308	0.0632	0.1007	0.1559	0.3889	0.0893
55.6	0.2914	0.1296	0.0672	0.1063	0.1553	0.3889	0.0882
55.7	0.2897	0.1302	0.068	0.1104	0.1564	0.3917	0.0887
55.8	0.2914	0.1308	0.0664	0.1063	0.1553	0.3917	0.0876
55.9	0.292	0.132	0.0648	0.1076	0.1559	0.3924	0.0876
56	0.2926	0.1363	0.0696	0.1076	0.1553	0.3924	0.0899
56.1	0.2926	0.1345	0.068	0.1097	0.157	0.391	0.0944
56.2	0.2938	0.1345	0.0672	0.1118	0.1564	0.3924	0.0944
56.3	0.2944	0.1375	0.0696	0.1097	0.1575	0.3938	0.0899
56.4	0.2962	0.1369	0.0696	0.1063	0.158	0.3952	0.0933
56.5	0.2962	0.1381	0.068	0.109	0.158	0.3945	0.0916
56.6	0.295	0.1394	0.072	0.1125	0.1591	0.3952	0.0922
56.7	0.2962	0.1345	0.0688	0.1111	0.1602	0.3959	0.091
56.8	0.2973	0.1375	0.072	0.1132	0.1602	0.3979	0.0939
56.9	0.2991	0.1381	0.0752	0.1125	0.1607	0.3993	0.0944
57	0.2991	0.1345	0.0728	0.1125	0.1607	0.3972	0.0927
57.1	0.2997	0.1375	0.0752	0.1111	0.1618	0.3979	0.095
57.2	0.3003	0.1388	0.0784	0.1145	0.1607	0.4007	0.0978
57.3	0.2991	0.1381	0.0768	0.1166	0.1618	0.4007	0.0996
57.4	0.2997	0.1406	0.076	0.1132	0.1634	0.4021	0.0967
57.5	0.3015	0.1381	0.0792	0.1145	0.1629	0.4035	0.0973
57.6	0.3015	0.1381	0.076	0.1138	0.1629	0.407	0.0984
57.7	0.3021	0.1424	0.0768	0.1145	0.1645	0.4063	0.0967
57.8	0.3026	0.1418	0.0768	0.118	0.1645	0.4049	0.0984
57.9	0.3038	0.1381	0.0704	0.1166	0.1651	0.407	0.0961
58	0.3038	0.143	0.076	0.1166	0.1645	0.4098	0.0973
58.1	0.305	0.1449	0.0808	0.1194	0.1645	0.4091	0.0984
58.2	0.305	0.1424	0.0776	0.1173	0.1656	0.4119	0.1007
58.3	0.305	0.1437	0.0784	0.118	0.1667	0.4126	0.0996
58.4	0.3044	0.1418	0.0792	0.1201	0.1656	0.4105	0.099
58.5	0.3074	0.1449	0.0808	0.1201	0.1672	0.4098	0.0973
58.6	0.305	0.1437	0.0768	0.1194	0.1656	0.4119	0.0973
58.7	0.3062	0.143	0.0808	0.1208	0.1678	0.4119	0.0956
58.8	0.3092	0.1449	0.0792	0.1208	0.1672	0.4133	0.0961
58.9	0.308	0.1443	0.0752	0.1173	0.1667	0.4105	0.0944
59	0.3098	0.1455	0.0752	0.1228	0.1678	0.4105	0.0944
59.1	0.3086	0.1467	0.0792	0.1222	0.1694	0.4126	0.0956
59.2	0.3103	0.1467	0.0768	0.1208	0.1689	0.4119	0.0961
59.3	0.3098	0.1449	0.0776	0.1201	0.1699	0.4119	0.0961
59.4	0.3092	0.1461	0.0784	0.1201	0.1699	0.4119	0.0922
59.5	0.3109	0.1461	0.0792	0.1208	0.1705	0.4105	0.0961
59.6	0.3098	0.1473	0.0792	0.1235	0.1721	0.4112	0.0944
59.7	0.3121	0.148	0.0824	0.1222	0.1721	0.4126	0.0904
59.8	0.3127	0.1492	0.0808	0.1208	0.1721	0.4098	0.0956
59.9	0.3121	0.1504	0.0808	0.1235	0.1732	0.4112	0.0996
60	0.3139	0.151	0.0848	0.1215	0.1721	0.4119	0.1007
60.1	0.3151	0.151	0.0816	0.1249	0.1721	0.4112	0.103
60.2	0.3169	0.1535	0.08	0.1228	0.1737	0.4119	0.1018
60.3	0.3175	0.1517	0.0832	0.1228	0.1727	0.4154	0.1047
60.4	0.3145	0.1535	0.084	0.1242	0.1743	0.4154	0.1053
60.5	0.3175	0.1547	0.0848	0.1228	0.1743	0.4175	0.1047
60.6	0.3181	0.1572	0.0872	0.1242	0.1727	0.4161	0.103
60.7	0.3199	0.1572	0.0848	0.1222	0.1727	0.4175	0.1035
60.8	0.3193	0.1591	0.084	0.1256	0.1748	0.4175	0.103
60.9	0.3199	0.1572	0.084	0.1235	0.1743	0.4189	0.1053
61	0.321	0.1578	0.084	0.1235	0.1743	0.4182	0.1024
61.1	0.321	0.1572	0.0848	0.1249	0.1748	0.4196	0.103
61.2	0.3216	0.1572	0.0897	0.1263	0.1754	0.4189	0.1053
61.3	0.321	0.1603	0.088	0.1249	0.1743	0.4196	0.1053
61.4	0.3204	0.1615	0.0888	0.1256	0.1776	0.4217	0.1047
61.5	0.3193	0.1609	0.0872	0.1256	0.1765	0.4203	0.1035
61.6	0.3216	0.1584	0.0872	0.1249	0.1759	0.4196	0.1024
61.7	0.3222	0.1591	0.088	0.1284	0.1765	0.4217	0.1035
61.8	0.324	0.1621	0.088	0.1256	0.177	0.4224	0.103
61.9	0.3222	0.1615	0.088	0.1263	0.1759	0.4217	0.103
62	0.324	0.1634	0.0864	0.1277	0.1759	0.4196	0.1058
62.1	0.324	0.1621	0.0888	0.1291	0.1765	0.4189	0.1053
62.2	0.324	0.1628	0.0864	0.127	0.1792	0.4203	0.1047
62.3	0.3246	0.1615	0.0864	0.1284	0.1786	0.4224	0.103
62.4	0.3246	0.1634	0.0897	0.1291	0.1797	0.421	0.1035
62.5	0.3252	0.1621	0.0872	0.1277	0.1803	0.4196	0.1058
62.6	0.3258	0.1628	0.0888	0.1305	0.1814	0.4168	0.107
62.7	0.327	0.1652	0.088	0.1305	0.1803	0.4189	0.1058
62.8	0.3288	0.1646	0.088	0.1291	0.1814	0.4203	0.1075
62.9	0.327	0.164	0.088	0.1333	0.1808	0.421	0.1087
63	0.3276	0.1658	0.0905	0.1319	0.1814	0.4196	0.1087
63.1	0.3288	0.1609	0.0888	0.1291	0.1797	0.4196	0.1047
63.2	0.3294	0.1615	0.0905	0.1305	0.1803	0.4217	0.1047
63.3	0.3294	0.1634	0.0897	0.1333	0.1814	0.4231	0.1075
63.4	0.3288	0.1603	0.0888	0.1291	0.1808	0.4217	0.1081
63.5	0.3294	0.1628	0.0872	0.1326	0.1814	0.4238	0.107
63.6	0.3288	0.1634	0.0848	0.1305	0.183	0.4245	0.1093
63.7	0.33	0.1603	0.0888	0.1347	0.1808	0.4266	0.1098
63.8	0.3264	0.1634	0.0864	0.1312	0.183	0.4266	0.111
63.9	0.33	0.1628	0.0888	0.134	0.1803	0.4252	0.1104
64	0.3324	0.164	0.088	0.136	0.1825	0.4259	0.1115
64.1	0.3318	0.1621	0.0872	0.1326	0.1841	0.4259	0.1087
64.2	0.33	0.1658	0.088	0.1347	0.1825	0.4273	0.1075
64.3	0.3306	0.1646	0.0921	0.1374	0.1841	0.4273	0.1081
64.4	0.3318	0.1646	0.0905	0.1326	0.1846	0.4294	0.1093
64.5	0.3324	0.1652	0.0913	0.134	0.1846	0.4294	0.1104
64.6	0.3336	0.1658	0.0929	0.1353	0.1868	0.428	0.1093
64.7	0.3324	0.1683	0.0913	0.134	0.1852	0.4322	0.111
64.8	0.3306	0.1652	0.0913	0.1347	0.1857	0.4315	0.1098
64.9	0.3312	0.1696	0.0929	0.1367	0.1868	0.4301	0.1087
65	0.3342	0.1677	0.0905	0.1347	0.1857	0.4294	0.1104
65.1	0.336	0.1683	0.0913	0.1367	0.1868	0.4315	0.1127
65.2	0.336	0.1708	0.0913	0.1381	0.1868	0.4301	0.1121
65.3	0.336	0.1733	0.088	0.1353	0.1874	0.4301	0.1081
65.4	0.3354	0.1683	0.0872	0.1395	0.1879	0.4315	0.1104
65.5	0.3354	0.1702	0.0937	0.1416	0.1896	0.4294	0.1093
65.6	0.3348	0.1689	0.0897	0.1388	0.1907	0.4308	0.1075
65.7	0.3372	0.1696	0.0921	0.1367	0.1907	0.4308	0.1058
65.8	0.3342	0.1714	0.0945	0.1388	0.1912	0.4315	0.1075
65.9	0.3372	0.1739	0.0937	0.1381	0.1901	0.4337	0.1075
66	0.3384	0.1714	0.0977	0.1395	0.1896	0.4329	0.1058
66.1	0.3366	0.1727	0.0985	0.1402	0.1907	0.4344	0.1075
66.2	0.3372	0.1745	0.0945	0.1423	0.1896	0.4329	0.1093
66.3	0.3378	0.1733	0.0969	0.1395	0.1907	0.4344	0.1093
66.4	0.3384	0.1739	0.0977	0.1409	0.1907	0.4344	0.1115
66.5	0.339	0.1764	0.0953	0.1409	0.1912	0.4365	0.1184
66.6	0.3402	0.1758	0.0945	0.143	0.1907	0.4351	0.1207
66.7	0.339	0.1776	0.0969	0.1388	0.1917	0.4358	0.119
66.8	0.3402	0.177	0.0921	0.143	0.1917	0.4344	0.1161
66.9	0.3378	0.1752	0.0937	0.1423	0.1939	0.4365	0.1156
67	0.3378	0.1764	0.0953	0.1374	0.1934	0.4337	0.1144
67.1	0.3414	0.1776	0.0921	0.1409	0.1956	0.4358	0.1115
67.2	0.3384	0.177	0.0953	0.1381	0.195	0.4365	0.111
67.3	0.3414	0.1752	0.0961	0.1388	0.195	0.4351	0.1144
67.4	0.3438	0.1764	0.0945	0.1402	0.195	0.4372	0.1144
67.5	0.342	0.1776	0.0913	0.1409	0.1945	0.4372	0.1156
67.6	0.3432	0.1783	0.0945	0.1395	0.1972	0.44	0.1138
67.7	0.3426	0.1783	0.0937	0.1402	0.1967	0.4393	0.1133
67.8	0.3456	0.1745	0.0961	0.1402	0.1967	0.4393	0.115
67.9	0.345	0.1752	0.0969	0.1416	0.1994	0.4421	0.1167
68	0.3468	0.1776	0.0937	0.1423	0.1972	0.4421	0.1161
68.1	0.348	0.177	0.0929	0.1409	0.1967	0.4414	0.1179
68.2	0.348	0.1795	0.0945	0.1402	0.2	0.4449	0.1184
68.3	0.3456	0.1801	0.0905	0.1402	0.2	0.4449	0.1184
68.4	0.3468	0.1789	0.0921	0.1402	0.2	0.4457	0.1179
68.5	0.3444	0.1789	0.0897	0.1381	0.2005	0.4478	0.1207
68.6	0.3462	0.182	0.0864	0.1409	0.1989	0.4492	0.1225
68.7	0.3486	0.1814	0.0888	0.1388	0.2005	0.4499	0.119
68.8	0.348	0.1839	0.0888	0.1381	0.1983	0.4478	0.1196
68.9	0.3462	0.182	0.0872	0.1416	0.2005	0.4499	0.1161
69	0.3498	0.1808	0.0913	0.1409	0.2	0.4527	0.1173
69.1	0.351	0.182	0.0888	0.1374	0.2022	0.4556	0.115
69.2	0.3534	0.182	0.0921	0.1437	0.2022	0.4534	0.115
69.3	0.3522	0.1826	0.0921	0.1395	0.2016	0.4534	0.1161
69.4	0.3516	0.1833	0.0913	0.1395	0.2022	0.4542	0.1161
69.5	0.354	0.1826	0.0913	0.1402	0.2022	0.452	0.1167
69.6	0.3534	0.1833	0.0953	0.1402	0.2033	0.452	0.1156
69.7	0.354	0.1833	0.0929	0.1381	0.2027	0.4527	0.115
69.8	0.3528	0.1833	0.0921	0.1409	0.2044	0.4534	0.1179
69.9	0.3534	0.1851	0.0961	0.1374	0.2033	0.4542	0.1184
70	0.3534	0.1851	0.0905	0.1374	0.2055	0.452	0.1184
70.1	0.3534	0.187	0.0897	0.1395	0.2033	0.4534	0.1196
70.2	0.3564	0.187	0.0961	0.1374	0.2044	0.4527	0.1179
70.3	0.3552	0.1901	0.0913	0.1367	0.2027	0.4534	0.119
70.4	0.3546	0.1889	0.0921	0.1388	0.2044	0.452	0.1173
70.5	0.3546	0.1882	0.0905	0.1395	0.2027	0.452	0.1167
70.6	0.354	0.1895	0.0929	0.1395	0.2033	0.4527	0.1179
70.7	0.3558	0.1889	0.0897	0.1423	0.2038	0.4527	0.1173
70.8	0.3558	0.1895	0.088	0.1416	0.2038	0.4542	0.1202
70.9	0.357	0.1889	0.0905	0.1416	0.2049	0.4549	0.1184
71	0.3564	0.1901	0.0913	0.143	0.2049	0.4549	0.119
71.1	0.3558	0.1889	0.0929	0.1402	0.2066	0.4563	0.1179
71.2	0.3558	0.192	0.0921	0.1402	0.2071	0.452	0.1179
71.3	0.3564	0.1901	0.0977	0.143	0.206	0.4513	0.1184
71.4	0.3558	0.1914	0.0929	0.1416	0.2071	0.4527	0.119
71.5	0.3576	0.1926	0.0953	0.1409	0.2093	0.4542	0.1207
71.6	0.357	0.1926	0.0953	0.1423	0.206	0.4542	0.119
71.7	0.36	0.1926	0.0945	0.1437	0.2066	0.4549	0.1196
71.8	0.3607	0.1926	0.0929	0.1416	0.2082	0.4542	0.1207
71.9	0.3613	0.1926	0.0969	0.1416	0.2071	0.4527	0.1179
72	0.3594	0.1951	0.0929	0.1423	0.2082	0.4527	0.119
72.1	0.3588	0.1951	0.0937	0.1402	0.2082	0.4542	0.1207
72.2	0.36	0.1964	0.0913	0.1423	0.2077	0.4563	0.1213
72.3	0.3588	0.1957	0.0913	0.1458	0.2077	0.4513	0.1207
72.4	0.3613	0.1989	0.0961	0.1423	0.2082	0.4549	0.1207
72.5	0.36	0.1964	0.0977	0.143	0.2088	0.4549	0.123
72.6	0.3619	0.197	0.0937	0.1451	0.2082	0.4556	0.1248
72.7	0.3613	0.2001	0.0945	0.1444	0.2077	0.4549	0.1225
72.8	0.3625	0.1976	0.0961	0.1423	0.2093	0.4549	0.1236
72.9	0.3625	0.2008	0.0929	0.1465	0.2077	0.4556	0.123
73	0.3637	0.2008	0.0945	0.1444	0.2082	0.4556	0.1248
73.1	0.3637	0.202	0.0961	0.143	0.2082	0.457	0.1259
73.2	0.3637	0.2001	0.0961	0.1486	0.2099	0.4563	0.1265
73.3	0.3655	0.202	0.0937	0.1465	0.2088	0.4584	0.1213
73.4	0.3661	0.2014	0.0937	0.1479	0.2104	0.4577	0.1213
73.5	0.3673	0.2033	0.0921	0.15	0.2104	0.4591	0.1196
73.6	0.3661	0.2033	0.0953	0.1458	0.2099	0.4563	0.1207
73.7	0.3691	0.2027	0.0905	0.1486	0.2099	0.4598	0.1196
73.8	0.3667	0.2027	0.0921	0.1479	0.2093	0.4577	0.123
73.9	0.3679	0.1995	0.0913	0.1451	0.2093	0.4606	0.123
74	0.3655	0.202	0.0888	0.1444	0.211	0.4627	0.1219
74.1	0.3667	0.202	0.0921	0.1486	0.2099	0.4641	0.1219
74.2	0.3679	0.2033	0.0929	0.1472	0.2132	0.4641	0.1236
74.3	0.3679	0.2045	0.0872	0.1486	0.2121	0.4677	0.1225
74.4	0.3697	0.2033	0.0897	0.1493	0.2121	0.4677	0.1225
74.5	0.3716	0.2039	0.0921	0.1472	0.2143	0.4677	0.1242
74.6	0.371	0.2033	0.0872	0.1486	0.2137	0.4655	0.1236
74.7	0.3697	0.2058	0.0953	0.1493	0.2137	0.4663	0.1225
74.8	0.3679	0.2071	0.0953	0.1486	0.2132	0.4655	0.1207
74.9	0.3722	0.2064	0.0929	0.1479	0.2132	0.4655	0.1207
75	0.3716	0.2071	0.0977	0.1507	0.2132	0.467	0.1265
75.1	0.3722	0.2089	0.0969	0.1486	0.2132	0.4648	0.1265
75.2	0.3734	0.2077	0.0953	0.1465	0.2137	0.462	0.1328
75.3	0.3716	0.2077	0.0969	0.1507	0.2137	0.4655	0.1328
75.4	0.374	0.2058	0.0977	0.1493	0.2159	0.4648	0.1346
75.5	0.3722	0.2071	0.0937	0.1472	0.217	0.4641	0.1328
75.6	0.3716	0.2071	0.0969	0.1486	0.217	0.4663	0.1305
75.7	0.3716	0.2077	0.0953	0.1479	0.2154	0.4655	0.1311
75.8	0.3734	0.2064	0.0913	0.1465	0.2148	0.4663	0.1334
75.9	0.374	0.2071	0.0953	0.1479	0.2159	0.4663	0.1346
76	0.374	0.2077	0.0969	0.15	0.217	0.4663	0.1323
76.1	0.3746	0.2077	0.0929	0.1507	0.217	0.4677	0.1346
76.2	0.3746	0.2077	0.0945	0.1542	0.2193	0.4705	0.1328
76.3	0.3764	0.2071	0.0969	0.1535	0.2187	0.4705	0.1317
76.4	0.3776	0.2064	0.0961	0.1528	0.2198	0.4684	0.1334
76.5	0.3764	0.2083	0.0977	0.1549	0.2165	0.4705	0.1334
76.6	0.377	0.2083	0.1001	0.15	0.2182	0.4698	0.1352
76.7	0.3752	0.2115	0.0993	0.1542	0.2182	0.4698	0.1369
76.8	0.3752	0.2115	0.0977	0.157	0.217	0.4684	0.1363
76.9	0.3758	0.2089	0.1042	0.1542	0.2193	0.4705	0.1369
77	0.3746	0.2108	0.101	0.1549	0.2193	0.4698	0.1363
77.1	0.3764	0.2115	0.0993	0.1556	0.2193	0.4698	0.1357
77.2	0.3776	0.2115	0.1066	0.1542	0.2215	0.4698	0.1369
77.3	0.3782	0.2121	0.1001	0.157	0.2193	0.4691	0.1398
77.4	0.3776	0.214	0.101	0.1605	0.2193	0.4698	0.1427
77.5	0.3764	0.2127	0.1034	0.1584	0.2204	0.4677	0.1415
77.6	0.3782	0.2133	0.101	0.1605	0.2204	0.4734	0.1415
77.7	0.3795	0.2121	0.1001	0.1591	0.2187	0.4712	0.1398
77.8	0.3789	0.2127	0.101	0.1626	0.2215	0.4691	0.1398
77.9	0.3789	0.2152	0.0985	0.1598	0.2198	0.4705	0.1398
78	0.3807	0.2133	0.0993	0.1598	0.222	0.4712	0.1415
78.1	0.3807	0.2159	0.1034	0.1584	0.2226	0.4698	0.1398
78.2	0.3819	0.2127	0.0993	0.157	0.2226	0.4712	0.1427
78.3	0.3825	0.2159	0.1001	0.1612	0.2226	0.4698	0.1444
78.4	0.3831	0.2152	0.1026	0.1591	0.2231	0.4705	0.1462
78.5	0.3831	0.214	0.101	0.1598	0.2231	0.4727	0.1438
78.6	0.3819	0.2159	0.0993	0.1591	0.2242	0.4705	0.1462
78.7	0.3825	0.2152	0.101	0.1605	0.2237	0.4727	0.1462
78.8	0.3795	0.2165	0.0985	0.1591	0.2231	0.4748	0.145
78.9	0.3831	0.2159	0.101	0.1612	0.2248	0.4734	0.145
79	0.385	0.2178	0.1026	0.1598	0.2242	0.4727	0.1456
79.1	0.388	0.2152	0.0985	0.1605	0.2254	0.4748	0.145
79.2	0.3892	0.2159	0.1026	0.1605	0.2242	0.4748	0.1473
79.3	0.3898	0.2165	0.1034	0.1584	0.2259	0.4748	0.1456
79.4	0.388	0.2171	0.0977	0.1612	0.2242	0.4755	0.1462
79.5	0.3892	0.2165	0.101	0.1619	0.2254	0.4734	0.1433
79.6	0.3886	0.2203	0.1018	0.157	0.2242	0.4741	0.1462
79.7	0.3886	0.2171	0.0961	0.1605	0.2248	0.4755	0.1456
79.8	0.3917	0.2159	0.0985	0.1619	0.2259	0.4734	0.145
79.9	0.3917	0.214	0.0993	0.1626	0.227	0.4755	0.1462
80	0.3923	0.2171	0.0977	0.164	0.227	0.4777	0.1479
80.1	0.3917	0.2159	0.101	0.1633	0.2265	0.4784	0.1508
80.2	0.3892	0.2171	0.0977	0.1633	0.227	0.4777	0.1502
80.3	0.3898	0.2178	0.0993	0.1633	0.227	0.4791	0.1514
80.4	0.3905	0.219	0.0993	0.1654	0.2281	0.4777	0.1526
80.5	0.3892	0.2165	0.0993	0.1612	0.2287	0.4769	0.1508
80.6	0.3917	0.219	0.1001	0.1647	0.2281	0.4777	0.1537
80.7	0.3917	0.2184	0.1034	0.1661	0.2287	0.4791	0.1508
80.8	0.3898	0.2171	0.101	0.164	0.2276	0.4791	0.1473
80.9	0.3892	0.2184	0.1034	0.1647	0.2281	0.4784	0.1438
81	0.3923	0.219	0.1026	0.1676	0.2298	0.4791	0.1438
81.1	0.3923	0.219	0.101	0.1654	0.2287	0.4798	0.1537
81.2	0.3923	0.2209	0.1018	0.1676	0.2298	0.4812	0.1531
81.3	0.3929	0.2203	0.1034	0.1682	0.2298	0.4805	0.1514
81.4	0.3923	0.2178	0.1001	0.1682	0.2292	0.4777	0.1543
81.5	0.3905	0.2228	0.1026	0.1647	0.2292	0.482	0.1543
81.6	0.3917	0.2216	0.1026	0.1682	0.2298	0.4769	0.1526
81.7	0.3898	0.2216	0.1018	0.1668	0.2326	0.4798	0.1543
81.8	0.3935	0.2222	0.1018	0.1647	0.2315	0.482	0.1508
81.9	0.3923	0.2222	0.1074	0.1668	0.2315	0.4812	0.1508
82	0.3947	0.219	0.1026	0.1668	0.2337	0.482	0.1508
82.1	0.3947	0.2228	0.1058	0.1689	0.232	0.4805	0.1485
82.2	0.3923	0.2241	0.1066	0.1654	0.232	0.482	0.1491
82.3	0.3941	0.2222	0.1034	0.1668	0.2326	0.4812	0.1502
82.4	0.3947	0.2235	0.105	0.1676	0.2337	0.4812	0.1496
82.5	0.3947	0.2228	0.1058	0.1647	0.2326	0.482	0.1456
82.6	0.3954	0.2216	0.1026	0.1654	0.2309	0.4827	0.1456
82.7	0.3947	0.2222	0.105	0.1654	0.2331	0.4841	0.1479
82.8	0.3978	0.2216	0.1074	0.164	0.2326	0.482	0.1467
82.9	0.3947	0.2222	0.1034	0.1668	0.2331	0.4848	0.1496
83	0.3954	0.2254	0.105	0.1676	0.2331	0.4827	0.1473
83.1	0.3966	0.2241	0.1066	0.1668	0.2354	0.4848	0.1491
83.2	0.3984	0.2247	0.1018	0.1682	0.2348	0.4841	0.1467
83.3	0.3978	0.2241	0.1026	0.1668	0.2359	0.4855	0.1479
83.4	0.4003	0.2254	0.1074	0.1668	0.2348	0.487	0.1485
83.5	0.3997	0.2273	0.1058	0.1676	0.2337	0.4841	0.1456
83.6	0.396	0.2273	0.105	0.1689	0.2348	0.4841	0.1462
83.7	0.3978	0.2279	0.1082	0.1697	0.2359	0.4834	0.1467
83.8	0.3954	0.2273	0.109	0.1711	0.2365	0.4848	0.1479
83.9	0.3984	0.226	0.1058	0.1704	0.2354	0.487	0.1456
84	0.4015	0.2292	0.1107	0.1697	0.2359	0.4863	0.1514
84.1	0.3997	0.226	0.1066	0.1697	0.2359	0.4841	0.1514
84.2	0.4009	0.2266	0.105	0.1718	0.2342	0.4848	0.1485
84.3	0.4021	0.226	0.1074	0.1682	0.237	0.487	0.1502
84.4	0.4039	0.2279	0.109	0.1676	0.2365	0.4848	0.1514
84.5	0.4033	0.2298	0.105	0.1668	0.2359	0.4855	0.1526
84.6	0.4046	0.2298	0.1082	0.1704	0.2354	0.487	0.1543
84.7	0.4058	0.2311	0.1082	0.1718	0.2365	0.4841	0.1531
84.8	0.4058	0.2323	0.109	0.1682	0.2354	0.4855	0.156
84.9	0.4064	0.2317	0.1115	0.1704	0.237	0.4855	0.1555
85	0.4064	0.233	0.109	0.1711	0.2359	0.4827	0.152
85.1	0.4027	0.2311	0.1098	0.1633	0.2381	0.4855	0.1526
85.2	0.4039	0.2317	0.1115	0.1647	0.2381	0.4877	0.1578
85.3	0.407	0.2323	0.1107	0.1689	0.237	0.4863	0.1537
85.4	0.4058	0.2323	0.109	0.1654	0.2393	0.4863	0.1549
85.5	0.4064	0.2304	0.1123	0.1647	0.2381	0.4863	0.1543
85.6	0.4039	0.233	0.109	0.1704	0.2387	0.4863	0.1479
85.7	0.4039	0.2323	0.109	0.1682	0.2393	0.4827	0.145
85.8	0.4076	0.2336	0.1147	0.1711	0.2404	0.487	0.1427
85.9	0.4064	0.2323	0.1131	0.1718	0.2415	0.4863	0.1433
86	0.407	0.233	0.1131	0.1697	0.2409	0.4834	0.1415
86.1	0.4058	0.2336	0.1155	0.1697	0.2415	0.4855	0.1415
86.2	0.4083	0.2343	0.1139	0.1682	0.2426	0.4863	0.1404
86.3	0.4058	0.2349	0.1139	0.1725	0.2437	0.4827	0.1433
86.4	0.4064	0.2343	0.1139	0.1718	0.2432	0.4841	0.1433
86.5	0.4058	0.233	0.1147	0.1704	0.2443	0.4863	0.1433
86.6	0.4064	0.2368	0.1139	0.1725	0.2448	0.487	0.1433
86.7	0.407	0.2349	0.1115	0.1725	0.2454	0.4848	0.145
86.8	0.4089	0.2336	0.1139	0.1711	0.2443	0.4863	0.1444
86.9	0.4095	0.2368	0.1163	0.1732	0.2437	0.487	0.145
87	0.4107	0.2381	0.1131	0.1725	0.2437	0.4884	0.1456
87.1	0.4083	0.2368	0.1139	0.1697	0.2465	0.4884	0.1479
87.2	0.4095	0.2336	0.1139	0.1711	0.246	0.4884	0.1433
87.3	0.4076	0.2343	0.1123	0.1704	0.246	0.4891	0.1427
87.4	0.4089	0.2343	0.1107	0.1711	0.2448	0.4906	0.1438
87.5	0.4083	0.2362	0.1123	0.1725	0.246	0.4898	0.145
87.6	0.4076	0.2387	0.1082	0.1718	0.2454	0.4898	0.1479
87.7	0.4083	0.2406	0.1115	0.1711	0.2448	0.4891	0.1491
87.8	0.4089	0.2406	0.1139	0.1697	0.2454	0.4891	0.1473
87.9	0.4101	0.2413	0.1107	0.1725	0.2448	0.4913	0.1502
88	0.4132	0.2406	0.1123	0.1689	0.2465	0.4934	0.159
88.1	0.4126	0.2413	0.1139	0.1689	0.2454	0.4934	0.1607
88.2	0.412	0.2413	0.1139	0.1704	0.2465	0.4934	0.1625
88.3	0.4132	0.24	0.1131	0.1676	0.2476	0.492	0.1601
88.4	0.4132	0.24	0.1139	0.1725	0.246	0.4913	0.1631
88.5	0.4126	0.2419	0.1139	0.1739	0.2487	0.492	0.1631
88.6	0.4126	0.2419	0.1131	0.1711	0.2487	0.4942	0.1636
88.7	0.4132	0.2413	0.1179	0.1739	0.2487	0.4934	0.1619
88.8	0.415	0.2355	0.1196	0.1732	0.2487	0.4942	0.1636
88.9	0.4138	0.2355	0.1163	0.1697	0.2493	0.4942	0.1636
89	0.415	0.2355	0.1212	0.1718	0.2499	0.4949	0.1654
89.1	0.4157	0.24	0.1163	0.1697	0.2487	0.4949	0.1671
89.2	0.415	0.2413	0.1163	0.1725	0.2499	0.497	0.1666
89.3	0.4181	0.2419	0.1179	0.1753	0.251	0.4934	0.1619
89.4	0.4157	0.2425	0.1155	0.1725	0.2504	0.4956	0.1642
89.5	0.4169	0.2425	0.1155	0.1753	0.2493	0.497	0.1648
89.6	0.4175	0.2425	0.1179	0.1774	0.2504	0.4956	0.1654
89.7	0.4163	0.2419	0.1147	0.1739	0.2521	0.4963	0.1636
89.8	0.415	0.2444	0.1163	0.1739	0.2515	0.4956	0.1625
89.9	0.4163	0.2413	0.1163	0.1725	0.2504	0.4956	0.1625
90	0.42	0.2432	0.1147	0.1732	0.2504	0.4985	0.1631
90.1	0.4194	0.24	0.1188	0.1725	0.2504	0.4992	0.1625
90.2	0.4212	0.2425	0.1155	0.1732	0.2527	0.4949	0.1631
90.3	0.4206	0.2413	0.1123	0.1739	0.2499	0.4942	0.1619
90.4	0.4194	0.2432	0.1139	0.1739	0.251	0.4963	0.1619
90.5	0.4163	0.2444	0.1147	0.1753	0.2515	0.4992	0.1601
90.6	0.4188	0.2438	0.1139	0.1739	0.2521	0.4999	0.156
90.7	0.4175	0.2419	0.1172	0.1718	0.251	0.4978	0.1625
90.8	0.4188	0.2444	0.1179	0.1732	0.2521	0.4999	0.1648
90.9	0.4212	0.2413	0.1155	0.1725	0.2521	0.5021	0.1642
91	0.4218	0.2451	0.1172	0.1718	0.2532	0.5028	0.1631
91.1	0.4194	0.2464	0.1196	0.1718	0.2538	0.4978	0.1642
91.2	0.4225	0.2451	0.1155	0.1753	0.2532	0.5021	0.1625
91.3	0.4231	0.2457	0.1188	0.1774	0.2532	0.5014	0.1654
91.4	0.4225	0.2444	0.1179	0.1774	0.2538	0.5014	0.1642
91.5	0.4194	0.2451	0.1172	0.1774	0.2544	0.4999	0.1648
91.6	0.4212	0.2444	0.1188	0.1781	0.2577	0.5021	0.1613
91.7	0.4212	0.2476	0.1212	0.1739	0.256	0.4999	0.1555
91.8	0.4206	0.2457	0.122	0.176	0.2555	0.4985	0.1537
91.9	0.4212	0.2457	0.1196	0.1788	0.2566	0.5006	0.1537
92	0.4218	0.2451	0.1236	0.1767	0.2577	0.5035	0.1555
92.1	0.4225	0.2464	0.122	0.1774	0.2566	0.5021	0.1549
92.2	0.4225	0.247	0.1212	0.1788	0.2572	0.5035	0.1566
92.3	0.4231	0.247	0.1245	0.181	0.2566	0.5014	0.1578
92.4	0.4218	0.2457	0.1228	0.1774	0.2555	0.5006	0.1607
92.5	0.4256	0.2464	0.1212	0.1816	0.256	0.5006	0.1595
92.6	0.4225	0.2476	0.1212	0.181	0.256	0.5006	0.1613
92.7	0.4237	0.2457	0.1228	0.1774	0.2566	0.5035	0.1683
92.8	0.4237	0.2476	0.122	0.1767	0.2544	0.5014	0.1683
92.9	0.4262	0.247	0.1228	0.1767	0.2566	0.4985	0.1654
93	0.4268	0.2476	0.1212	0.1788	0.256	0.4992	0.1584
93.1	0.428	0.2483	0.1228	0.1802	0.2566	0.5035	0.1578
93.2	0.4274	0.2515	0.1245	0.1781	0.2588	0.4963	0.1566
93.3	0.4293	0.2489	0.1212	0.1781	0.2583	0.4999	0.1584
93.4	0.4287	0.247	0.1269	0.1774	0.26	0.5014	0.1572
93.5	0.4299	0.2489	0.1253	0.1767	0.2583	0.5021	0.159
93.6	0.4299	0.2508	0.1253	0.1774	0.2577	0.5035	0.1595
93.7	0.4293	0.2502	0.1261	0.1788	0.2594	0.5006	0.1584
93.8	0.4311	0.2515	0.1293	0.1781	0.2583	0.4992	0.1607
93.9	0.4299	0.2515	0.1245	0.1753	0.2588	0.5021	0.1595
94	0.433	0.2515	0.1269	0.1774	0.2577	0.5035	0.159
94.1	0.4311	0.2528	0.1293	0.1795	0.26	0.5014	0.159
94.2	0.4318	0.2515	0.1285	0.1781	0.2588	0.5035	0.159
94.3	0.4305	0.2534	0.1269	0.1838	0.2605	0.5021	0.1607
94.4	0.4305	0.2534	0.1293	0.1824	0.2588	0.4992	0.1601
94.5	0.4324	0.2572	0.1334	0.1816	0.26	0.4985	0.159
94.6	0.4318	0.254	0.131	0.1831	0.2605	0.5006	0.1601
94.7	0.4318	0.2572	0.135	0.1831	0.2588	0.5021	0.1607
94.8	0.4318	0.2547	0.1318	0.181	0.2611	0.5014	0.1584
94.9	0.4305	0.256	0.131	0.1845	0.26	0.5021	0.159
95	0.4343	0.2579	0.1318	0.1831	0.2594	0.4992	0.159
95.1	0.4324	0.2547	0.131	0.1831	0.2605	0.5021	0.1578
95.2	0.433	0.2579	0.1302	0.1845	0.2617	0.4985	0.1607
95.3	0.4343	0.2598	0.1326	0.1859	0.2617	0.5006	0.1718
95.4	0.4361	0.2605	0.1285	0.1845	0.2622	0.5021	0.1742
95.5	0.4349	0.2605	0.1293	0.1852	0.2622	0.5006	0.1724
95.6	0.4349	0.2585	0.1318	0.188	0.2622	0.5028	0.1718
95.7	0.4355	0.2572	0.1293	0.1859	0.2628	0.4992	0.1689
95.8	0.4374	0.2579	0.1285	0.1845	0.2628	0.5014	0.1607
95.9	0.438	0.2579	0.1318	0.1831	0.2617	0.5035	0.1578
96	0.4361	0.2592	0.1285	0.1824	0.2628	0.5035	0.1555
96.1	0.4349	0.2592	0.1293	0.1845	0.2628	0.5035	0.1578
96.2	0.4361	0.2592	0.1293	0.1859	0.2633	0.4992	0.1537
96.3	0.4374	0.2598	0.1269	0.1859	0.2645	0.5042	0.159
96.4	0.438	0.2598	0.1261	0.1845	0.2628	0.4963	0.1572
96.5	0.4386	0.2598	0.1277	0.1859	0.2645	0.4999	0.1578
96.6	0.4405	0.2605	0.1277	0.1831	0.2662	0.4999	0.1578
96.7	0.4392	0.2598	0.1277	0.1859	0.2656	0.4999	0.1578
96.8	0.438	0.2617	0.1302	0.1838	0.2667	0.4992	0.1601
96.9	0.438	0.263	0.1293	0.1816	0.2678	0.4978	0.1595
97	0.438	0.2611	0.131	0.1852	0.2667	0.4999	0.159
97.1	0.4386	0.2605	0.1293	0.1845	0.2662	0.4999	0.1555
97.2	0.4411	0.2637	0.1326	0.1852	0.2673	0.4999	0.1584
97.3	0.4386	0.2605	0.1326	0.1845	0.2667	0.5028	0.159
97.4	0.4411	0.2611	0.1326	0.1859	0.265	0.4999	0.1607
97.5	0.4399	0.2611	0.1326	0.1845	0.2662	0.5021	0.1595
97.6	0.4411	0.2637	0.1334	0.1873	0.2673	0.5006	0.1595
97.7	0.4424	0.2611	0.1326	0.188	0.2695	0.5021	0.159
97.8	0.4405	0.2617	0.131	0.188	0.2684	0.5021	0.159
97.9	0.4405	0.2598	0.1383	0.1901	0.2673	0.5006	0.1607
98	0.4405	0.2592	0.1375	0.1923	0.2656	0.5006	0.1595
98.1	0.4399	0.2598	0.1359	0.1866	0.2695	0.4978	0.1607
98.2	0.4417	0.2598	0.1383	0.1887	0.269	0.5035	0.1613
98.3	0.4405	0.2617	0.1367	0.1901	0.2735	0.4999	0.1601
98.4	0.4424	0.2611	0.1367	0.1901	0.2695	0.5014	0.1595
98.5	0.4411	0.263	0.1375	0.1916	0.2678	0.5014	0.1625
98.6	0.443	0.2637	0.1375	0.193	0.269	0.5035	0.1607
98.7	0.443	0.2637	0.1375	0.1894	0.2673	0.4992	0.1619
98.8	0.4436	0.2624	0.1383	0.1923	0.2695	0.5021	0.1619
98.9	0.4442	0.2637	0.135	0.1923	0.2701	0.5035	0.1607
99	0.4442	0.263	0.1359	0.193	0.2712	0.5028	0.1636
99.1	0.4436	0.2617	0.1383	0.193	0.2712	0.5035	0.1625
99.2	0.4449	0.2637	0.1375	0.1937	0.2707	0.5014	0.1619
99.3	0.4455	0.265	0.1383	0.1916	0.2701	0.5014	0.1636
99.4	0.4455	0.2637	0.1391	0.1916	0.2712	0.505	0.1642
99.5	0.4436	0.2637	0.1367	0.188	0.2695	0.505	0.1625
99.6	0.4436	0.2611	0.1375	0.1909	0.2701	0.505	0.1631
99.7	0.4455	0.2617	0.1408	0.1894	0.2707	0.5028	0.1648
99.8	0.4455	0.2553	0.1318	0.1894	0.269	0.5042	0.166
99.9	0.4455	0.2579	0.1334	0.1916	0.2718	0.5028	0.1654
100	0.4467	0.2585	0.1375	0.1916	0.2718	0.5035	0.1642
100.1	0.4474	0.2566	0.1342	0.1894	0.2729	0.5014	0.1631
100.2	0.4474	0.2598	0.1375	0.1916	0.2718	0.5071	0.1636
100.3	0.4467	0.2585	0.1399	0.193	0.2729	0.5042	0.1636
100.4	0.4492	0.2566	0.1367	0.1901	0.2724	0.5014	0.166
100.5	0.4492	0.2572	0.1375	0.1894	0.2707	0.5064	0.1666
100.6	0.4499	0.2585	0.1383	0.1901	0.2718	0.5042	0.1666
100.7	0.4499	0.2617	0.1383	0.1894	0.2724	0.505	0.1671
100.8	0.4492	0.2592	0.1399	0.1901	0.2729	0.505	0.1701
100.9	0.4499	0.2579	0.1448	0.1901	0.2735	0.5057	0.1677
101	0.4486	0.2605	0.1408	0.1909	0.2718	0.5042	0.1671
101.1	0.4505	0.2592	0.1416	0.1894	0.2724	0.505	0.1671
101.2	0.4517	0.263	0.144	0.1916	0.2724	0.5057	0.1666
101.3	0.4499	0.2624	0.1408	0.1909	0.2741	0.5035	0.1671
101.4	0.4505	0.2617	0.1399	0.1923	0.2741	0.505	0.1671
101.5	0.4505	0.2598	0.1448	0.1923	0.2735	0.505	0.1671
101.6	0.448	0.2579	0.1448	0.1958	0.2741	0.5057	0.1666
101.7	0.448	0.2592	0.1465	0.1944	0.2729	0.5071	0.1683
101.8	0.4486	0.2598	0.1498	0.1923	0.2741	0.5064	0.1677
101.9	0.4499	0.2617	0.1473	0.1958	0.2752	0.5093	0.1666
102	0.4486	0.2605	0.1465	0.1951	0.2746	0.5071	0.1677
102.1	0.4486	0.2611	0.1473	0.1944	0.2735	0.5093	0.1654
102.2	0.4474	0.2605	0.1457	0.1965	0.2729	0.5021	0.1642
102.3	0.4499	0.2617	0.144	0.1965	0.2741	0.5057	0.1648
102.4	0.4492	0.2624	0.1465	0.1937	0.2741	0.5078	0.1642
102.5	0.4499	0.2617	0.1448	0.1951	0.2729	0.5071	0.1625
102.6	0.4505	0.2643	0.144	0.198	0.2746	0.5078	0.1642
102.7	0.448	0.263	0.144	0.1965	0.2752	0.51	0.166
102.8	0.4492	0.2617	0.1448	0.1965	0.2746	0.5071	0.1671
102.9	0.4499	0.2617	0.1489	0.1987	0.2746	0.5086	0.1677
103	0.4505	0.2617	0.1498	0.2001	0.2746	0.51	0.1654
103.1	0.4505	0.2624	0.1481	0.1965	0.2746	0.5078	0.1666
103.2	0.4524	0.265	0.1489	0.1987	0.2763	0.5086	0.1642
103.3	0.453	0.263	0.1506	0.2008	0.2746	0.5078	0.1654
103.4	0.4524	0.263	0.1498	0.2001	0.2746	0.5078	0.1648
103.5	0.453	0.265	0.1481	0.2022	0.2746	0.5071	0.1642
103.6	0.4561	0.2637	0.153	0.2001	0.2769	0.5086	0.1666
103.7	0.453	0.2662	0.1457	0.1994	0.2763	0.5064	0.1666
103.8	0.453	0.2656	0.1465	0.2015	0.2774	0.5107	0.1671
103.9	0.4542	0.2643	0.1498	0.1972	0.2786	0.5107	0.1648
104	0.4561	0.2643	0.1481	0.1972	0.2786	0.51	0.1677
104.1	0.4555	0.2662	0.1489	0.1972	0.2786	0.5122	0.1677
104.2	0.4549	0.2662	0.1538	0.1987	0.278	0.5151	0.1701
104.3	0.4542	0.2656	0.1465	0.1951	0.2791	0.5158	0.1689
104.4	0.4542	0.2656	0.153	0.2001	0.2803	0.5144	0.1695
104.5	0.4561	0.2662	0.1547	0.2001	0.2791	0.51	0.1695
104.6	0.4555	0.265	0.1506	0.198	0.278	0.5129	0.1712
104.7	0.4555	0.2662	0.153	0.1987	0.2791	0.5129	0.173
104.8	0.4561	0.2624	0.1555	0.2029	0.2774	0.5122	0.1701
104.9	0.4549	0.2624	0.1538	0.1994	0.2791	0.5129	0.1712
105	0.4568	0.2637	0.1571	0.2015	0.2814	0.5107	0.1695
105.1	0.458	0.2617	0.153	0.2015	0.2797	0.5158	0.1695
105.2	0.4568	0.263	0.1571	0.1987	0.2814	0.5115	0.1718
105.3	0.4574	0.2656	0.1571	0.2008	0.2808	0.5151	0.1718
105.4	0.4593	0.2643	0.1538	0.1987	0.282	0.5115	0.1718
105.5	0.4593	0.2656	0.1563	0.1965	0.282	0.5151	0.1765
105.6	0.4599	0.265	0.1555	0.1987	0.2825	0.5129	0.1759
105.7	0.4611	0.2656	0.1547	0.1987	0.2814	0.5136	0.1759
105.8	0.4611	0.2656	0.158	0.1965	0.2814	0.5165	0.1771
105.9	0.4586	0.2624	0.1604	0.1987	0.2825	0.5151	0.1765
106	0.4599	0.2643	0.158	0.198	0.2831	0.5136	0.1777
106.1	0.4605	0.2624	0.158	0.1987	0.2831	0.5093	0.1783
106.2	0.4605	0.2656	0.158	0.2008	0.2814	0.5151	0.1777
106.3	0.4605	0.2643	0.1588	0.2001	0.2831	0.5122	0.1771
106.4	0.4605	0.2682	0.1563	0.2022	0.2814	0.5122	0.1777
106.5	0.4611	0.2669	0.158	0.2022	0.2848	0.5122	0.1754
106.6	0.463	0.2669	0.1596	0.1994	0.2831	0.5144	0.1754
106.7	0.4643	0.2682	0.1588	0.2022	0.2848	0.5122	0.1771
106.8	0.463	0.2688	0.1571	0.2029	0.2837	0.5093	0.1777
106.9	0.4643	0.2695	0.1604	0.2008	0.2848	0.5151	0.1765
107	0.4637	0.2688	0.1596	0.2022	0.2854	0.5173	0.1771
107.1	0.4618	0.2675	0.1555	0.2036	0.2848	0.5144	0.1777
107.2	0.4624	0.2695	0.1612	0.2029	0.2865	0.5115	0.18
107.3	0.4618	0.2675	0.1588	0.2029	0.2854	0.5151	0.1783
107.4	0.4618	0.2688	0.1588	0.2044	0.2848	0.5151	0.18
107.5	0.4624	0.2688	0.1588	0.2022	0.2837	0.5144	0.1789
107.6	0.4624	0.2669	0.1588	0.2036	0.2865	0.518	0.1795
107.7	0.4656	0.2695	0.158	0.2051	0.2871	0.518	0.1795
107.8	0.4649	0.2708	0.1604	0.2036	0.2871	0.5202	0.1789
107.9	0.4674	0.2708	0.1645	0.2051	0.2871	0.5187	0.1783
108	0.4668	0.2688	0.1571	0.2072	0.2876	0.5187	0.1783
108.1	0.4681	0.2708	0.1621	0.2072	0.2859	0.5223	0.18
108.2	0.4674	0.2708	0.158	0.2072	0.2876	0.5187	0.1777
108.3	0.4662	0.2746	0.1571	0.2058	0.2865	0.5209	0.1789
108.4	0.4687	0.272	0.1596	0.2086	0.2876	0.5209	0.1765
108.5	0.4668	0.2708	0.158	0.2079	0.2876	0.5245	0.1765
108.6	0.4656	0.2727	0.1588	0.2086	0.2888	0.5245	0.1771
108.7	0.4674	0.2727	0.1588	0.2079	0.2888	0.5231	0.1783
108.8	0.4656	0.2733	0.158	0.2072	0.2871	0.5274	0.1789
108.9	0.4681	0.2727	0.1604	0.2058	0.2871	0.5252	0.1777
109	0.4662	0.274	0.1604	0.2051	0.2865	0.5267	0.1765
109.1	0.4674	0.274	0.1596	0.2072	0.2894	0.526	0.1783
109.2	0.4681	0.274	0.1629	0.2065	0.2888	0.5238	0.1771
109.3	0.4674	0.2759	0.1629	0.2086	0.2894	0.526	0.1765
109.4	0.4674	0.274	0.1621	0.2079	0.2888	0.526	0.1777
109.5	0.4668	0.2746	0.1637	0.2079	0.2882	0.5289	0.1759
109.6	0.4681	0.274	0.1612	0.2079	0.2905	0.5267	0.1789
109.7	0.4668	0.2766	0.158	0.2086	0.2894	0.5245	0.1777
109.8	0.4674	0.2753	0.1662	0.2065	0.2911	0.5267	0.1771
109.9	0.4668	0.2746	0.1629	0.2072	0.2911	0.526	0.1783
110	0.4687	0.2727	0.1645	0.2086	0.2894	0.5267	0.18
110.1	0.4681	0.274	0.1653	0.2086	0.2911	0.5252	0.1806
110.2	0.4668	0.2753	0.1629	0.2065	0.2899	0.5289	0.183
110.3	0.4687	0.2753	0.1612	0.2086	0.2899	0.5281	0.1812
110.4	0.4687	0.2759	0.1621	0.2065	0.2899	0.5296	0.1818
110.5	0.4681	0.2753	0.1637	0.2058	0.2894	0.5303	0.183
110.6	0.4687	0.2772	0.1637	0.2086	0.2899	0.5274	0.1824
110.7	0.4693	0.2759	0.1703	0.2079	0.2888	0.5274	0.18
110.8	0.4718	0.2772	0.1686	0.2079	0.2888	0.5281	0.1795
110.9	0.4687	0.2779	0.1711	0.2065	0.2899	0.531	0.1818
111	0.4693	0.2779	0.1695	0.2086	0.2905	0.5281	0.1789
111.1	0.4706	0.2772	0.167	0.2065	0.2899	0.5296	0.18
111.2	0.4687	0.2785	0.1695	0.2072	0.2911	0.5325	0.1806
111.3	0.4681	0.2856	0.1695	0.2093	0.2911	0.5303	0.1806
111.4	0.4668	0.285	0.1678	0.2108	0.2916	0.5318	0.18
111.5	0.4693	0.285	0.1695	0.2115	0.2928	0.5318	0.1818
111.6	0.4712	0.2869	0.1686	0.2144	0.2916	0.5303	0.183
111.7	0.4725	0.2856	0.167	0.2115	0.2905	0.5325	0.183
111.8	0.4718	0.2869	0.1703	0.2115	0.2916	0.5303	0.1854
111.9	0.4718	0.2889	0.1703	0.2129	0.2939	0.5332	0.1818
112	0.47	0.2876	0.1703	0.2122	0.2922	0.5325	0.1818
112.1	0.4693	0.2824	0.1719	0.2136	0.2933	0.5361	0.1848
112.2	0.4725	0.2843	0.1719	0.2129	0.2922	0.5296	0.1824
112.3	0.4744	0.2824	0.1695	0.2108	0.2933	0.5318	0.1824
112.4	0.4712	0.2837	0.1744	0.2144	0.2933	0.5318	0.1824
112.5	0.4706	0.2856	0.1703	0.2122	0.2939	0.5296	0.1824
112.6	0.4725	0.2856	0.167	0.2129	0.2933	0.5296	0.183
112.7	0.4731	0.2863	0.1695	0.2136	0.2933	0.5318	0.1818
112.8	0.4731	0.2863	0.1728	0.2129	0.2933	0.5325	0.1824
112.9	0.4731	0.2876	0.1695	0.2158	0.2956	0.534	0.1836
113	0.4706	0.2843	0.1752	0.2201	0.2939	0.5325	0.1818
113.1	0.4706	0.2876	0.1711	0.2158	0.2945	0.5303	0.1824
113.2	0.4725	0.2882	0.1752	0.2158	0.295	0.5391	0.1842
113.3	0.4744	0.2882	0.1719	0.2186	0.2956	0.534	0.1848
113.4	0.4756	0.2889	0.1752	0.2172	0.295	0.534	0.1848
113.5	0.4737	0.2908	0.1736	0.2151	0.295	0.5361	0.1842
113.6	0.4763	0.2902	0.1728	0.2179	0.2962	0.5376	0.1848
113.7	0.4763	0.2902	0.1711	0.2179	0.2962	0.5383	0.1865
113.8	0.4744	0.2928	0.1719	0.2179	0.2956	0.5347	0.1877
113.9	0.475	0.2941	0.1752	0.2158	0.2956	0.5361	0.1901
114	0.4756	0.2928	0.1703	0.2186	0.2962	0.5376	0.1912
114.1	0.475	0.2941	0.1736	0.2144	0.295	0.5325	0.1877
114.2	0.4744	0.2941	0.1711	0.2158	0.2933	0.5391	0.1848
114.3	0.475	0.2934	0.176	0.2158	0.2956	0.5361	0.1848
114.4	0.4763	0.2928	0.1711	0.2129	0.295	0.5383	0.1848
114.5	0.4775	0.2954	0.1719	0.2158	0.2968	0.5398	0.1842
114.6	0.4756	0.2934	0.1777	0.2144	0.2945	0.5405	0.1865
114.7	0.4763	0.2915	0.1728	0.2144	0.2962	0.5391	0.1883
114.8	0.475	0.2921	0.1736	0.2186	0.2962	0.5376	0.1877
114.9	0.4756	0.2921	0.176	0.2165	0.295	0.5405	0.1877
115	0.4769	0.2889	0.1785	0.2144	0.2962	0.5398	0.1877
115.1	0.4782	0.2928	0.1744	0.2158	0.2956	0.5376	0.1859
115.2	0.4794	0.2895	0.1777	0.2136	0.2956	0.5464	0.1901
115.3	0.4807	0.2908	0.1769	0.2136	0.2968	0.5413	0.1895
115.4	0.4794	0.2921	0.1769	0.2165	0.2945	0.5405	0.1907
115.5	0.4794	0.2915	0.1769	0.2151	0.295	0.5413	0.1889
115.6	0.4794	0.2934	0.1752	0.2172	0.2979	0.5398	0.1912
115.7	0.4801	0.2934	0.1744	0.2165	0.295	0.5405	0.1883
115.8	0.4788	0.296	0.1802	0.2151	0.2962	0.5413	0.1877
115.9	0.4788	0.2941	0.1785	0.2129	0.2973	0.5398	0.1907
116	0.4788	0.296	0.1777	0.2151	0.2985	0.5405	0.1889
116.1	0.4782	0.2954	0.1777	0.2158	0.2968	0.5405	0.1859
116.2	0.4794	0.2941	0.1793	0.2136	0.2973	0.5434	0.1871
116.3	0.4769	0.2941	0.1769	0.2165	0.2985	0.5398	0.1883
116.4	0.4775	0.2934	0.1785	0.2158	0.2979	0.5391	0.1901
116.5	0.4775	0.2941	0.1802	0.2122	0.2996	0.5413	0.1889
116.6	0.4801	0.2954	0.1818	0.2151	0.299	0.542	0.1907
116.7	0.4807	0.2941	0.181	0.2165	0.2996	0.542	0.1901
116.8	0.4807	0.2973	0.1827	0.2151	0.2985	0.5427	0.1918
116.9	0.4807	0.2973	0.1851	0.2144	0.2985	0.542	0.1895
117	0.4801	0.2967	0.181	0.2179	0.2996	0.5383	0.1924
117.1	0.482	0.2999	0.1818	0.2165	0.2996	0.5347	0.1936
117.2	0.4807	0.298	0.1777	0.2194	0.2973	0.5427	0.1942
117.3	0.4794	0.2993	0.1818	0.2215	0.2985	0.5391	0.193
117.4	0.4788	0.2973	0.1793	0.2194	0.2985	0.5413	0.1918
117.5	0.4807	0.2986	0.1777	0.2179	0.2985	0.5398	0.1901
117.6	0.4794	0.2993	0.181	0.2208	0.2985	0.5391	0.1918
117.7	0.4794	0.2986	0.1802	0.2215	0.2996	0.5369	0.1901
117.8	0.4813	0.2986	0.181	0.2194	0.3002	0.5376	0.1901
117.9	0.4775	0.2999	0.181	0.2165	0.3002	0.5405	0.1924
118	0.4769	0.3019	0.1827	0.2179	0.3013	0.5376	0.1924
118.1	0.4769	0.3025	0.1851	0.2186	0.3007	0.5456	0.1948
118.2	0.4788	0.3038	0.181	0.2172	0.3013	0.5383	0.1942
118.3	0.4788	0.3045	0.1843	0.2215	0.3007	0.5405	0.1948
118.4	0.4801	0.3052	0.1835	0.2215	0.3013	0.5383	0.1954
118.5	0.4826	0.3045	0.1802	0.2186	0.3019	0.5398	0.193
118.6	0.4826	0.3038	0.1827	0.2222	0.303	0.5391	0.1918
118.7	0.4826	0.3025	0.1835	0.2194	0.3019	0.5413	0.1901
118.8	0.4845	0.3025	0.1851	0.2215	0.3025	0.5413	0.1901
118.9	0.4813	0.3019	0.186	0.2237	0.3025	0.5434	0.1889
119	0.4851	0.3038	0.1827	0.2222	0.3025	0.5398	0.1889
119.1	0.4826	0.3025	0.1868	0.2237	0.3025	0.5405	0.1924
119.2	0.4845	0.3032	0.1843	0.2251	0.3025	0.5478	0.1942
119.3	0.4851	0.3058	0.1851	0.2222	0.3025	0.5383	0.1942
119.4	0.4832	0.3038	0.1827	0.2215	0.3019	0.5427	0.1942
119.5	0.4845	0.3045	0.1918	0.2244	0.3025	0.5405	0.1942
119.6	0.4851	0.3012	0.1851	0.2237	0.3007	0.5434	0.1948
119.7	0.4839	0.3012	0.1769	0.2265	0.303	0.542	0.1918
119.8	0.4832	0.3045	0.1843	0.2258	0.303	0.5434	0.1936
119.9	0.4839	0.3032	0.1785	0.2229	0.3013	0.5434	0.1942
120	0.487	0.3038	0.1868	0.2237	0.303	0.5449	0.1936
120.1	0.4845	0.3032	0.1818	0.2272	0.3036	0.542	0.196
120.2	0.487	0.3045	0.186	0.2244	0.303	0.5398	0.1948
120.3	0.4883	0.3032	0.1876	0.2244	0.3036	0.5456	0.1948
120.4	0.4877	0.3032	0.1876	0.2244	0.3059	0.5449	0.1936
120.5	0.4864	0.3052	0.1884	0.2215	0.3065	0.5456	0.1936
120.6	0.4883	0.3058	0.1851	0.2222	0.3053	0.5442	0.1924
120.7	0.4858	0.3058	0.1909	0.2208	0.3059	0.5449	0.1912
120.8	0.487	0.3065	0.1909	0.2215	0.3053	0.5449	0.1918
120.9	0.487	0.3058	0.1901	0.2229	0.307	0.5456	0.193
121	0.4889	0.3025	0.1909	0.2229	0.3053	0.5456	0.196
121.1	0.487	0.3058	0.181	0.2222	0.307	0.5493	0.1918
121.2	0.4864	0.3038	0.1843	0.2244	0.3065	0.5471	0.193
121.3	0.4896	0.3052	0.1909	0.2215	0.3087	0.5464	0.1918
121.4	0.4889	0.3058	0.1851	0.228	0.3076	0.5486	0.1924
121.5	0.4902	0.3045	0.1901	0.2323	0.3082	0.5478	0.1936
121.6	0.4896	0.3058	0.1918	0.2272	0.3065	0.5456	0.1936
121.7	0.4889	0.3084	0.1868	0.2272	0.3076	0.5464	0.1942
121.8	0.4877	0.3084	0.1909	0.228	0.3082	0.5456	0.1948
121.9	0.487	0.3091	0.1951	0.2272	0.307	0.5449	0.1954
122	0.4896	0.313	0.1901	0.2237	0.307	0.5471	0.196
122.1	0.4889	0.3104	0.1868	0.228	0.3087	0.5515	0.196
122.2	0.4883	0.3123	0.1926	0.2301	0.3099	0.5486	0.1989
122.3	0.4902	0.3143	0.1843	0.233	0.3082	0.5478	0.196
122.4	0.4902	0.315	0.1868	0.2351	0.311	0.55	0.1954
122.5	0.4908	0.3123	0.1884	0.2337	0.3099	0.5464	0.1966
122.6	0.4896	0.313	0.1901	0.2337	0.311	0.5486	0.1948
122.7	0.4902	0.3123	0.1976	0.2323	0.3116	0.5456	0.1954
122.8	0.4934	0.3104	0.1976	0.2315	0.3099	0.5456	0.1972
122.9	0.4915	0.315	0.1876	0.2308	0.311	0.5478	0.1983
123	0.4902	0.3163	0.1942	0.2337	0.3105	0.5464	0.1983
123.1	0.487	0.3176	0.1967	0.2315	0.311	0.5391	0.1972
123.2	0.487	0.3169	0.1893	0.2344	0.3116	0.5413	0.1983
123.3	0.4889	0.3169	0.1959	0.2395	0.3122	0.5449	0.1983
123.4	0.4896	0.3189	0.1901	0.2373	0.3116	0.5471	0.1989
123.5	0.4889	0.3169	0.1901	0.233	0.3116	0.5478	0.2007
123.6	0.4915	0.3183	0.1934	0.2395	0.3122	0.5449	0.1989
123.7	0.4908	0.3183	0.1976	0.238	0.3122	0.5486	0.1995
123.8	0.4908	0.3176	0.1976	0.2366	0.3128	0.5434	0.1989
123.9	0.4902	0.3189	0.2017	0.2395	0.3122	0.5456	0.1972
124	0.4902	0.3189	0.1976	0.238	0.3133	0.5449	0.1995
124.1	0.4889	0.3196	0.1976	0.2344	0.3133	0.5405	0.1995
124.2	0.4902	0.3202	0.1976	0.2366	0.3128	0.5515	0.2001
124.3	0.4896	0.3183	0.1868	0.2351	0.3122	0.5449	0.1972
124.4	0.4889	0.3176	0.1934	0.2337	0.3128	0.5434	0.196
124.5	0.4908	0.3196	0.1934	0.2351	0.3133	0.5449	0.1989
124.6	0.4902	0.3169	0.1934	0.2344	0.3139	0.5434	0.1995
124.7	0.4908	0.3196	0.1959	0.2344	0.3156	0.5442	0.1972
124.8	0.4915	0.3176	0.1926	0.2351	0.3151	0.542	0.1954
124.9	0.4928	0.3209	0.1942	0.2359	0.3156	0.5442	0.1966
125	0.4934	0.3183	0.1934	0.2359	0.3156	0.5434	0.1978
125.1	0.4934	0.3183	0.1992	0.238	0.3162	0.5413	0.196
125.2	0.4928	0.3189	0.1934	0.2388	0.3168	0.5376	0.1983
125.3	0.4928	0.3183	0.1926	0.2395	0.3173	0.5464	0.1954
125.4	0.4934	0.3215	0.1909	0.2431	0.3156	0.5471	0.1966
125.5	0.4959	0.3215	0.1967	0.2402	0.3179	0.5478	0.196
125.6	0.4959	0.3176	0.2	0.2416	0.3168	0.5493	0.2019
125.7	0.494	0.3209	0.1984	0.2438	0.3179	0.5478	0.2025
125.8	0.4947	0.3209	0.1984	0.2409	0.3168	0.55	0.2037
125.9	0.494	0.3222	0.1934	0.2431	0.3156	0.55	0.1983
126	0.4921	0.3235	0.1942	0.2452	0.3162	0.55	0.1972
126.1	0.494	0.3209	0.1909	0.2416	0.3173	0.5537	0.1978
126.2	0.4928	0.3222	0.1843	0.2416	0.3179	0.5508	0.1983
126.3	0.4934	0.3215	0.1851	0.2438	0.3162	0.5486	0.1972
126.4	0.4959	0.3215	0.1876	0.2467	0.3185	0.5486	0.2096
126.5	0.4966	0.3229	0.1926	0.2474	0.3173	0.5486	0.2055
126.6	0.4966	0.3242	0.1918	0.2474	0.3185	0.5515	0.1989
126.7	0.4966	0.3229	0.186	0.2561	0.3185	0.5522	0.1983
126.8	0.4978	0.3268	0.1926	0.2583	0.3162	0.5508	0.1972
126.9	0.4978	0.3268	0.1976	0.2532	0.3162	0.5522	0.196
127	0.4991	0.3255	0.1942	0.2539	0.3179	0.5493	0.1978
127.1	0.4998	0.3248	0.2009	0.2561	0.3214	0.55	0.1978
127.2	0.4998	0.3268	0.1942	0.2546	0.3191	0.553	0.2025
127.3	0.4985	0.3248	0.1934	0.251	0.3208	0.553	0.2013
127.4	0.4985	0.3261	0.1901	0.2517	0.3196	0.5566	0.2031
127.5	0.4991	0.3268	0.1876	0.2525	0.3196	0.5552	0.2049
127.6	0.4991	0.3255	0.1918	0.2525	0.3208	0.5544	0.2049
127.7	0.4978	0.3275	0.1926	0.2546	0.3202	0.5559	0.2037
127.8	0.4991	0.3261	0.1926	0.2546	0.3168	0.5537	0.2025
127.9	0.4991	0.3275	0.1884	0.2546	0.3179	0.5544	0.2013
128	0.4985	0.3288	0.1992	0.2517	0.3179	0.5566	0.2019
128.1	0.4985	0.3288	0.1967	0.2517	0.3185	0.5566	0.2031
128.2	0.5004	0.3288	0.1959	0.2496	0.3179	0.5647	0.2043
128.3	0.5004	0.3301	0.1926	0.2517	0.3162	0.5596	0.2031
128.4	0.4998	0.3275	0.2017	0.2539	0.3208	0.5566	0.2037
128.5	0.5004	0.3288	0.2017	0.2525	0.3208	0.5566	0.2025
128.6	0.4998	0.3288	0.1951	0.2525	0.3185	0.5581	0.2049
128.7	0.4991	0.3288	0.1984	0.2532	0.3196	0.5603	0.2025
128.8	0.4985	0.3301	0.2025	0.2546	0.3219	0.5588	0.2013
128.9	0.4985	0.3294	0.205	0.2575	0.3225	0.5588	0.2007
129	0.4998	0.3294	0.205	0.2561	0.3214	0.5603	0.2001
129.1	0.5004	0.3281	0.2075	0.2546	0.3231	0.5662	0.1995
129.2	0.4972	0.3294	0.1976	0.2561	0.3208	0.5632	0.1995
129.3	0.4991	0.3308	0.2009	0.2532	0.3225	0.5603	0.2007
129.4	0.4972	0.3308	0.2025	0.2503	0.3225	0.561	0.2019
129.5	0.4978	0.3334	0.2009	0.2561	0.3219	0.5618	0.2025
129.6	0.4998	0.3321	0.205	0.267	0.3225	0.5574	0.2019
129.7	0.4991	0.3321	0.2	0.2655	0.3219	0.5588	0.2031
129.8	0.4978	0.3354	0.2	0.2619	0.3225	0.5596	0.2055
129.9	0.4991	0.3347	0.2059	0.2568	0.3214	0.5588	0.2055
130	0.4998	0.3341	0.1942	0.2583	0.3219	0.5552	0.2037
130.1	0.5004	0.3354	0.2009	0.2604	0.3225	0.5618	0.2114
130.2	0.4991	0.3354	0.1976	0.2655	0.3219	0.5574	0.2162
130.3	0.4985	0.3334	0.1967	0.2677	0.3219	0.5544	0.2174
130.4	0.4998	0.3327	0.2075	0.2684	0.3214	0.5552	0.2198
130.5	0.4998	0.3327	0.2009	0.2648	0.3219	0.5574	0.2198
130.6	0.5004	0.336	0.1934	0.2641	0.3208	0.5574	0.2168
130.7	0.4991	0.3341	0.2034	0.2641	0.3208	0.5574	0.2192
130.8	0.4998	0.3367	0.2	0.267	0.3219	0.5588	0.2186
130.9	0.4985	0.3367	0.2042	0.2604	0.3231	0.5603	0.221
131	0.4985	0.336	0.2075	0.2619	0.3219	0.5603	0.2215
131.1	0.4998	0.3374	0.2025	0.2626	0.3237	0.5655	0.2198
131.2	0.501	0.3347	0.2	0.2633	0.3225	0.5581	0.2204
131.3	0.5004	0.336	0.2042	0.2633	0.3231	0.5574	0.2174
131.4	0.5017	0.3374	0.1976	0.2662	0.3231	0.5581	0.2174
131.5	0.5023	0.3367	0.2025	0.267	0.3219	0.5581	0.2168
131.6	0.501	0.336	0.2059	0.2648	0.3242	0.5581	0.2162
131.7	0.5017	0.3387	0.2084	0.2612	0.3231	0.5596	0.2168
131.8	0.5017	0.3354	0.2009	0.2568	0.3248	0.5566	0.2186
131.9	0.5017	0.3367	0.2017	0.267	0.3248	0.5588	0.2168
132	0.5023	0.34	0.2059	0.2706	0.3254	0.5581	0.2156
132.1	0.5029	0.3374	0.2059	0.2626	0.3248	0.5515	0.2162
132.2	0.5017	0.3393	0.2025	0.2641	0.326	0.5559	0.2198
132.3	0.5042	0.338	0.2042	0.2612	0.326	0.5566	0.2186
132.4	0.5029	0.3387	0.2025	0.2568	0.326	0.5581	0.218
132.5	0.5023	0.3407	0.205	0.2619	0.3277	0.5566	0.218
132.6	0.5055	0.34	0.2017	0.2699	0.3277	0.5537	0.2192
132.7	0.5029	0.3407	0.1984	0.2612	0.3283	0.5552	0.2186
132.8	0.5055	0.3407	0.2134	0.2619	0.3254	0.5566	0.218
132.9	0.5055	0.3427	0.2142	0.2648	0.3265	0.5544	0.2186
133	0.5036	0.3427	0.2142	0.2575	0.3283	0.5537	0.2186
133.1	0.5029	0.34	0.2134	0.2604	0.3277	0.553	0.2162
133.2	0.5042	0.3427	0.2034	0.2597	0.3265	0.5522	0.215
133.3	0.5036	0.34	0.2009	0.2583	0.3265	0.5559	0.2162
133.4	0.5042	0.3393	0.1976	0.2561	0.3271	0.5574	0.2174
133.5	0.5029	0.3393	0.2042	0.2597	0.3271	0.5588	0.2174
133.6	0.5042	0.3407	0.2017	0.2619	0.3283	0.5566	0.2198
133.7	0.5029	0.34	0.1967	0.2619	0.3265	0.5581	0.2186
133.8	0.5023	0.34	0.2017	0.2626	0.3277	0.5566	0.2192
133.9	0.5049	0.3393	0.1992	0.2612	0.3283	0.5566	0.218
134	0.5036	0.338	0.2017	0.2539	0.3306	0.5588	0.2198
134.1	0.5042	0.34	0.1967	0.2554	0.3283	0.5515	0.2204
134.2	0.5049	0.34	0.2025	0.2597	0.3289	0.5537	0.2215
134.3	0.5049	0.3413	0.2042	0.2604	0.3277	0.5588	0.2245
134.4	0.5036	0.3407	0.205	0.2641	0.3283	0.5574	0.2227
134.5	0.5061	0.3427	0.2059	0.2633	0.3289	0.5588	0.221
134.6	0.5074	0.3407	0.2117	0.2612	0.3283	0.5588	0.2221
134.7	0.5068	0.3433	0.205	0.2641	0.3289	0.5596	0.2233
134.8	0.5074	0.3413	0.2092	0.2619	0.3277	0.5581	0.2221
134.9	0.5042	0.3407	0.2084	0.2641	0.3289	0.5588	0.2233
135	0.5068	0.342	0.2117	0.2626	0.3271	0.561	0.2257
135.1	0.5061	0.3407	0.21	0.2655	0.3294	0.5522	0.2245
135.2	0.5061	0.3413	0.2134	0.2648	0.3289	0.5552	0.2251
135.3	0.5068	0.3407	0.2158	0.2648	0.3294	0.5581	0.2245
135.4	0.5081	0.3433	0.2125	0.2655	0.3294	0.5603	0.2239
135.5	0.5081	0.344	0.2175	0.2655	0.3289	0.5596	0.2239
135.6	0.5081	0.3427	0.2184	0.2662	0.33	0.5603	0.2245
135.7	0.5074	0.344	0.215	0.2662	0.3306	0.5581	0.2263
135.8	0.5081	0.3413	0.215	0.2662	0.3312	0.5581	0.2245
135.9	0.5061	0.344	0.2234	0.2706	0.3329	0.5625	0.2257
136	0.5087	0.344	0.2217	0.2655	0.3317	0.561	0.2275
136.1	0.5081	0.346	0.2242	0.2677	0.3329	0.5552	0.2257
136.2	0.5093	0.346	0.2242	0.2677	0.3317	0.5603	0.2251
136.3	0.5087	0.3453	0.2259	0.2706	0.3317	0.5581	0.2239
136.4	0.5093	0.344	0.2234	0.2684	0.3312	0.5581	0.2227
136.5	0.5093	0.3433	0.225	0.2721	0.3323	0.5588	0.2233
136.6	0.5081	0.346	0.2259	0.2699	0.3317	0.5625	0.2275
136.7	0.5081	0.346	0.2217	0.267	0.3312	0.5588	0.2281
136.8	0.5074	0.3473	0.2259	0.2699	0.3323	0.561	0.2281
136.9	0.5106	0.3473	0.2309	0.2692	0.3329	0.5581	0.2299
137	0.5087	0.3453	0.2259	0.267	0.3317	0.561	0.2293
137.1	0.5074	0.3473	0.2267	0.2728	0.3329	0.5581	0.2299
137.2	0.5087	0.3473	0.2284	0.2684	0.3329	0.5603	0.2269
137.3	0.5087	0.3473	0.2326	0.2713	0.334	0.5588	0.2287
137.4	0.5113	0.3466	0.2292	0.2706	0.334	0.5581	0.2293
137.5	0.5113	0.3499	0.2334	0.2706	0.3335	0.5625	0.2275
137.6	0.51	0.3486	0.2351	0.2684	0.334	0.5588	0.2263
137.7	0.5125	0.3493	0.2384	0.2743	0.334	0.5596	0.2275
137.8	0.5119	0.3486	0.2334	0.2706	0.3346	0.5618	0.2263
137.9	0.51	0.3486	0.2351	0.2728	0.334	0.5603	0.2281
138	0.51	0.348	0.2376	0.2721	0.3352	0.5618	0.2293
138.1	0.5125	0.3486	0.2342	0.2721	0.334	0.5537	0.2293
138.2	0.5125	0.3513	0.2351	0.2743	0.334	0.5581	0.2299
138.3	0.5119	0.3493	0.2393	0.2721	0.3358	0.5596	0.2323
138.4	0.5106	0.3493	0.2384	0.2721	0.3346	0.5581	0.2323
138.5	0.5125	0.348	0.2393	0.2794	0.3346	0.5596	0.2347
138.6	0.51	0.348	0.2418	0.2794	0.3352	0.5618	0.2347
138.7	0.5125	0.348	0.2409	0.275	0.334	0.5596	0.2329
138.8	0.5151	0.3493	0.2384	0.275	0.3346	0.5566	0.2299
138.9	0.5125	0.3493	0.2435	0.2699	0.3358	0.5588	0.2305
139	0.5125	0.3473	0.2418	0.2735	0.3358	0.5596	0.2299
139.1	0.5138	0.3499	0.2401	0.2772	0.3335	0.5618	0.2305
139.2	0.5132	0.346	0.2435	0.2779	0.3352	0.5596	0.2329
139.3	0.5125	0.348	0.2418	0.2713	0.3352	0.5625	0.2341
139.4	0.5138	0.3499	0.2409	0.2779	0.3364	0.5632	0.2353
139.5	0.5151	0.3506	0.2426	0.275	0.3358	0.5588	0.2347
139.6	0.5145	0.3506	0.2409	0.2743	0.3346	0.564	0.2353
139.7	0.5157	0.3519	0.2409	0.2757	0.3352	0.5618	0.2347
139.8	0.5157	0.3499	0.2426	0.2735	0.3346	0.5632	0.2353
139.9	0.5132	0.3493	0.2435	0.2713	0.3358	0.561	0.2347
140	0.5138	0.3493	0.2351	0.2735	0.3352	0.5588	0.2353
140.1	0.5151	0.348	0.2409	0.2757	0.3364	0.561	0.2341
140.2	0.5151	0.3533	0.2435	0.2706	0.3364	0.5625	0.2341
140.3	0.5138	0.3493	0.2435	0.2735	0.3358	0.5588	0.2347
140.4	0.5145	0.3526	0.2443	0.2721	0.3352	0.5588	0.2329
140.5	0.5145	0.3499	0.2443	0.2721	0.3364	0.561	0.2341
140.6	0.5151	0.3526	0.2435	0.2743	0.3375	0.5596	0.2359
140.7	0.5151	0.3506	0.2426	0.2706	0.3375	0.561	0.2359
140.8	0.517	0.3493	0.2401	0.2743	0.3375	0.5588	0.2353
140.9	0.5157	0.3526	0.2426	0.2728	0.3381	0.5588	0.2305
141	0.5164	0.3526	0.2451	0.2721	0.3375	0.561	0.2329
141.1	0.5177	0.3493	0.2401	0.2713	0.3375	0.564	0.2323
141.2	0.5177	0.348	0.2426	0.275	0.3387	0.5655	0.2317
141.3	0.5177	0.3499	0.2418	0.2721	0.3393	0.5588	0.2317
141.4	0.5177	0.348	0.2435	0.2728	0.341	0.5588	0.2323
141.5	0.5196	0.3513	0.2367	0.275	0.3416	0.5603	0.2305
141.6	0.5209	0.3466	0.2409	0.2735	0.3416	0.5559	0.2317
141.7	0.5183	0.3473	0.2409	0.2728	0.3416	0.5603	0.2335
141.8	0.5189	0.346	0.2376	0.2735	0.3421	0.5559	0.2347
141.9	0.5196	0.3493	0.2409	0.2713	0.3416	0.5625	0.2341
142	0.5189	0.3506	0.2451	0.2706	0.3433	0.5566	0.2353
142.1	0.5183	0.3486	0.2384	0.2706	0.3421	0.5625	0.2329
142.2	0.5177	0.3519	0.2409	0.2728	0.3433	0.564	0.2353
142.3	0.5177	0.3506	0.2435	0.2684	0.3427	0.5581	0.2341
142.4	0.5196	0.3539	0.2418	0.2706	0.3433	0.5574	0.2347
142.5	0.5196	0.3533	0.2418	0.2692	0.3421	0.5596	0.2341
142.6	0.5196	0.3526	0.246	0.2728	0.3433	0.5544	0.2305
142.7	0.5196	0.3539	0.2451	0.2779	0.3427	0.5544	0.2305
142.8	0.5209	0.3533	0.2342	0.275	0.3439	0.5537	0.2305
142.9	0.5222	0.3566	0.2401	0.2728	0.3427	0.5522	0.2323
143	0.5202	0.3566	0.2451	0.2728	0.3439	0.553	0.2335
143.1	0.5183	0.3546	0.2443	0.2713	0.3433	0.5471	0.2317
143.2	0.517	0.3539	0.2426	0.2713	0.3433	0.5471	0.2335
143.3	0.5177	0.3539	0.2426	0.2757	0.3421	0.5537	0.2347
143.4	0.5177	0.3546	0.2401	0.2786	0.3439	0.553	0.2329
143.5	0.5183	0.3519	0.2384	0.2772	0.3427	0.5544	0.221
143.6	0.517	0.3539	0.2426	0.2706	0.3433	0.5537	0.2198
143.7	0.5202	0.3546	0.2384	0.2757	0.3427	0.5574	0.2204
143.8	0.5202	0.3559	0.2393	0.2721	0.3427	0.5522	0.2215
143.9	0.5196	0.3546	0.2468	0.275	0.345	0.5574	0.2227
144	0.5209	0.3553	0.2451	0.2757	0.3433	0.5566	0.2257
144.1	0.5202	0.3553	0.2426	0.2772	0.3433	0.5478	0.2239
144.2	0.5177	0.3566	0.2435	0.2772	0.345	0.55	0.221
144.3	0.5183	0.3586	0.2367	0.2786	0.3445	0.5537	0.2221
144.4	0.5189	0.3566	0.2443	0.2764	0.3439	0.5552	0.2233
144.5	0.5189	0.3553	0.2426	0.2757	0.345	0.5566	0.2239
144.6	0.5196	0.3566	0.2418	0.2757	0.3445	0.5544	0.2275
144.7	0.5202	0.3559	0.246	0.2743	0.3445	0.5522	0.2257
144.8	0.5222	0.3566	0.2477	0.2728	0.3439	0.5544	0.2257
144.9	0.5209	0.3579	0.2435	0.2743	0.3456	0.5508	0.2269
145	0.5234	0.3586	0.246	0.2764	0.3445	0.5522	0.221
145.1	0.5202	0.3586	0.2477	0.2757	0.345	0.5493	0.218
145.2	0.5228	0.3586	0.2485	0.275	0.345	0.5508	0.215
145.3	0.5222	0.3586	0.2485	0.2794	0.3456	0.55	0.215
145.4	0.5222	0.3593	0.2493	0.2772	0.3456	0.5508	0.2168
145.5	0.5215	0.3579	0.246	0.2808	0.345	0.5515	0.2174
145.6	0.5234	0.3579	0.2443	0.2801	0.3468	0.5456	0.2168
145.7	0.5234	0.3606	0.2451	0.2786	0.3462	0.55	0.2168
145.8	0.5222	0.3586	0.246	0.2801	0.3462	0.5478	0.2162
145.9	0.5215	0.3593	0.2418	0.2801	0.3456	0.5456	0.2192
146	0.5222	0.3599	0.2485	0.2808	0.3462	0.5471	0.2233
146.1	0.5247	0.3593	0.2426	0.2808	0.3462	0.5478	0.2245
146.2	0.5228	0.3613	0.2443	0.2794	0.3468	0.5515	0.2239
146.3	0.5234	0.3606	0.2468	0.2801	0.3468	0.5442	0.2233
146.4	0.5247	0.3599	0.2401	0.2801	0.3474	0.5486	0.2215
146.5	0.5247	0.3613	0.2451	0.2801	0.3474	0.55	0.2198
146.6	0.5234	0.3553	0.2451	0.2772	0.3468	0.5478	0.221
146.7	0.5247	0.3593	0.2435	0.2794	0.3479	0.5522	0.2233
146.8	0.5234	0.3573	0.2451	0.2779	0.3491	0.5471	0.2239
146.9	0.5241	0.3573	0.246	0.2764	0.3479	0.5486	0.2239
147	0.5254	0.3593	0.2435	0.2779	0.3462	0.5456	0.2251
147.1	0.5247	0.3593	0.2502	0.2772	0.3474	0.5588	0.2263
147.2	0.5267	0.3599	0.2451	0.2743	0.3474	0.5486	0.2204
147.3	0.5254	0.3593	0.2451	0.2772	0.3479	0.5522	0.2186
147.4	0.526	0.3579	0.2443	0.2764	0.3485	0.5493	0.2174
147.5	0.5273	0.3599	0.2485	0.2772	0.3485	0.5515	0.2192
147.6	0.5254	0.3599	0.246	0.2794	0.3485	0.5508	0.218
147.7	0.5273	0.3586	0.2443	0.2801	0.3485	0.5552	0.2186
147.8	0.5267	0.3573	0.2477	0.2772	0.3485	0.5515	0.2168
147.9	0.5286	0.3573	0.2435	0.2779	0.3485	0.5537	0.221
148	0.5267	0.3586	0.2477	0.2764	0.3479	0.5544	0.2227
148.1	0.5273	0.3606	0.2519	0.2764	0.3497	0.5442	0.2215
148.2	0.528	0.3573	0.2443	0.2794	0.3491	0.5471	0.2221
148.3	0.5299	0.3606	0.2485	0.2772	0.3497	0.5515	0.2215
148.4	0.5292	0.3593	0.2477	0.2779	0.3497	0.5508	0.2192
148.5	0.5299	0.3606	0.2451	0.2779	0.3497	0.5515	0.2192
148.6	0.5318	0.3606	0.2485	0.2779	0.3514	0.5508	0.2168
148.7	0.5286	0.3593	0.2527	0.2772	0.3509	0.553	0.2192
148.8	0.5299	0.3579	0.2485	0.2794	0.3497	0.55	0.221
148.9	0.5305	0.3579	0.2493	0.2786	0.3503	0.5493	0.2221
149	0.5318	0.3579	0.2485	0.2794	0.3497	0.5486	0.2227
149.1	0.5312	0.3613	0.2477	0.2794	0.3503	0.5464	0.2227
149.2	0.5305	0.3633	0.2493	0.2779	0.3509	0.5449	0.2215
149.3	0.5312	0.3626	0.2502	0.2757	0.3509	0.5493	0.221
149.4	0.5318	0.3626	0.2493	0.2743	0.3503	0.55	0.2215
149.5	0.5318	0.3599	0.2485	0.2757	0.3497	0.5493	0.221
149.6	0.5312	0.3593	0.2485	0.2743	0.3503	0.5486	0.2186
149.7	0.5312	0.3619	0.2468	0.2772	0.3491	0.5493	0.2221
149.8	0.5318	0.3606	0.2502	0.2779	0.3491	0.5486	0.2192
149.9	0.5325	0.3633	0.2485	0.2779	0.3497	0.5508	0.218
150	0.5312	0.3619	0.2451	0.2764	0.3514	0.5471	0.2174
150.1	0.5318	0.3613	0.246	0.2794	0.3497	0.5464	0.2198
150.2	0.5312	0.3613	0.2477	0.2794	0.3497	0.5552	0.218
150.3	0.528	0.3626	0.2485	0.2786	0.3503	0.5471	0.218
150.4	0.5312	0.3653	0.2502	0.2772	0.3503	0.5478	0.218
150.5	0.5318	0.3639	0.251	0.2808	0.3491	0.5471	0.2186
150.6	0.5305	0.3639	0.2502	0.2794	0.3509	0.5471	0.2168
150.7	0.5292	0.3653	0.2493	0.2779	0.3503	0.5456	0.218
150.8	0.5325	0.3659	0.2519	0.2815	0.352	0.5471	0.2198
150.9	0.5331	0.3646	0.2519	0.2801	0.3526	0.5471	0.2168
151	0.5331	0.3653	0.2485	0.2815	0.3514	0.5442	0.2186
151.1	0.5318	0.3646	0.2544	0.2808	0.3509	0.5478	0.2198
151.2	0.5318	0.3659	0.2468	0.2815	0.3526	0.542	0.221
151.3	0.5338	0.3666	0.2502	0.2823	0.3514	0.5471	0.221
151.4	0.5318	0.3653	0.2535	0.2808	0.3526	0.5515	0.2198
151.5	0.5312	0.3666	0.251	0.2786	0.3532	0.55	0.2198
151.6	0.5312	0.3646	0.2502	0.2786	0.3532	0.5471	0.2227
151.7	0.5312	0.3633	0.2485	0.2808	0.352	0.5478	0.2239
151.8	0.5286	0.3673	0.2477	0.2801	0.3532	0.5508	0.2192
151.9	0.5312	0.3686	0.2527	0.2794	0.352	0.5493	0.2221
152	0.5325	0.3639	0.2527	0.2786	0.3544	0.5471	0.2215
152.1	0.5325	0.3666	0.2493	0.2786	0.352	0.5413	0.2215
152.2	0.5292	0.3659	0.2519	0.2786	0.3526	0.55	0.2245
152.3	0.5312	0.3659	0.2493	0.2794	0.3549	0.5471	0.2257
152.4	0.5305	0.3646	0.2493	0.2794	0.3532	0.5449	0.2263
152.5	0.5305	0.3666	0.2502	0.2786	0.3555	0.5471	0.2257
152.6	0.5318	0.3666	0.2485	0.2801	0.3549	0.5493	0.2245
152.7	0.5299	0.3633	0.2502	0.2823	0.3549	0.5515	0.2269
152.8	0.5305	0.3639	0.251	0.2852	0.3538	0.5515	0.2263
152.9	0.5325	0.3619	0.251	0.2823	0.3544	0.5493	0.2257
153	0.5325	0.3646	0.251	0.2852	0.3555	0.5515	0.2263
153.1	0.5325	0.3659	0.2535	0.2823	0.3532	0.5493	0.2269
153.2	0.5318	0.3673	0.2493	0.283	0.352	0.5559	0.2227
153.3	0.5325	0.3659	0.2493	0.2837	0.3549	0.5537	0.2233
153.4	0.5331	0.3673	0.2519	0.283	0.3544	0.5566	0.2221
153.5	0.5331	0.37	0.2502	0.2808	0.3549	0.5588	0.2245
153.6	0.5331	0.3686	0.2468	0.2852	0.3532	0.5566	0.2275
153.7	0.5338	0.3646	0.2519	0.2815	0.3555	0.5588	0.2245
153.8	0.5318	0.3646	0.2527	0.2801	0.3544	0.5581	0.2263
153.9	0.5331	0.3666	0.2468	0.2823	0.3544	0.5581	0.2269
154	0.5331	0.3653	0.2519	0.2794	0.3561	0.5566	0.2269
154.1	0.5338	0.3659	0.2544	0.2794	0.3538	0.5647	0.2269
154.2	0.535	0.3653	0.2519	0.2845	0.3561	0.5537	0.2269
154.3	0.5338	0.3653	0.2502	0.2794	0.3555	0.5559	0.2245
154.4	0.5318	0.3659	0.2552	0.2815	0.3544	0.5603	0.2269
154.5	0.5344	0.3673	0.2493	0.283	0.3561	0.5625	0.2281
154.6	0.5331	0.3666	0.2527	0.2801	0.3567	0.561	0.2269
154.7	0.5338	0.3679	0.2544	0.2808	0.3578	0.5596	0.2293
154.8	0.5318	0.3686	0.2519	0.2815	0.3573	0.561	0.2275
154.9	0.5338	0.3679	0.2544	0.2801	0.3578	0.561	0.2251
155	0.5338	0.3693	0.251	0.2801	0.3578	0.5596	0.2269
155.1	0.5331	0.3686	0.2519	0.2837	0.3584	0.5655	0.2299
155.2	0.5331	0.3686	0.2502	0.2794	0.3561	0.5566	0.2293
155.3	0.5318	0.3686	0.2569	0.2823	0.3573	0.5625	0.2281
155.4	0.5357	0.37	0.2519	0.283	0.3573	0.561	0.2257
155.5	0.5331	0.3693	0.2535	0.2801	0.3578	0.561	0.2245
155.6	0.5357	0.3686	0.2552	0.2823	0.3567	0.5618	0.2233
155.7	0.5357	0.372	0.2493	0.283	0.3561	0.5618	0.2251
155.8	0.5363	0.3713	0.2535	0.2808	0.3573	0.5603	0.2257
155.9	0.5383	0.3713	0.2535	0.2823	0.3567	0.5632	0.2281
156	0.535	0.3706	0.2544	0.2852	0.359	0.5632	0.2293
156.1	0.5357	0.37	0.2527	0.2794	0.3584	0.5596	0.2293
156.2	0.5344	0.37	0.251	0.2808	0.3584	0.5647	0.2299
156.3	0.5338	0.3706	0.2535	0.2823	0.3584	0.561	0.2281
156.4	0.5338	0.3706	0.2552	0.2786	0.359	0.5647	0.2263
156.5	0.5363	0.3693	0.2535	0.2801	0.359	0.5647	0.2281
156.6	0.535	0.3686	0.2519	0.2808	0.3584	0.5669	0.2287
156.7	0.5363	0.3693	0.2569	0.2786	0.3573	0.564	0.2305
156.8	0.537	0.3686	0.2544	0.283	0.3573	0.564	0.2335
156.9	0.5389	0.3706	0.2535	0.2837	0.3584	0.5669	0.2335
157	0.5357	0.3713	0.2544	0.2801	0.3584	0.5625	0.2317
157.1	0.537	0.37	0.2544	0.2808	0.3578	0.5574	0.2281
157.2	0.5363	0.3706	0.2552	0.283	0.3573	0.5603	0.2293
157.3	0.5363	0.3679	0.2552	0.2823	0.359	0.5596	0.2305
157.4	0.5363	0.3686	0.2519	0.2845	0.3584	0.5625	0.2287
157.5	0.5363	0.3673	0.2519	0.2837	0.3602	0.5655	0.2317
157.6	0.5383	0.3653	0.2552	0.283	0.3584	0.564	0.2311
157.7	0.5389	0.3659	0.2544	0.2852	0.3567	0.5662	0.2329
157.8	0.5363	0.3646	0.2544	0.2837	0.3596	0.5655	0.2305
157.9	0.5389	0.3673	0.2552	0.2837	0.359	0.5669	0.2305
158	0.5389	0.3686	0.2544	0.2859	0.3584	0.5655	0.2311
158.1	0.5396	0.3706	0.2544	0.2801	0.3578	0.5691	0.2323
158.2	0.5389	0.3713	0.2552	0.2852	0.3578	0.5625	0.2305
158.3	0.5389	0.3713	0.2561	0.2859	0.3602	0.5647	0.2293
158.4	0.5389	0.3706	0.2527	0.2852	0.359	0.5647	0.2305
158.5	0.5376	0.3679	0.2561	0.2874	0.3573	0.5625	0.2317
158.6	0.5402	0.3679	0.2535	0.2867	0.359	0.561	0.2317
158.7	0.5415	0.3686	0.2552	0.2837	0.3602	0.564	0.2311
158.8	0.5415	0.37	0.2544	0.2859	0.3596	0.5677	0.2317
158.9	0.5415	0.3713	0.2527	0.2867	0.3596	0.5632	0.2317
159	0.5402	0.37	0.2594	0.2845	0.3608	0.5603	0.2305
159.1	0.5409	0.3686	0.2578	0.2867	0.3608	0.5603	0.2311
159.2	0.5409	0.37	0.2535	0.2881	0.3596	0.5618	0.2287
159.3	0.537	0.3693	0.2586	0.2845	0.3619	0.5632	0.2305
159.4	0.5396	0.3713	0.2561	0.2867	0.3602	0.5647	0.2305
159.5	0.5389	0.372	0.2527	0.2867	0.3602	0.5632	0.2341
159.6	0.5376	0.37	0.2569	0.2852	0.3619	0.5677	0.2299
159.7	0.5376	0.3706	0.2561	0.2867	0.3625	0.5662	0.2293
159.8	0.5389	0.3726	0.2519	0.2845	0.3625	0.5647	0.2293
159.9	0.5415	0.376	0.2578	0.2845	0.3619	0.564	0.2305
160	0.5389	0.3767	0.2586	0.2859	0.3608	0.5662	0.2305
160.1	0.5409	0.3746	0.2535	0.2881	0.3602	0.561	0.2359
160.2	0.5422	0.3746	0.2569	0.283	0.3619	0.5632	0.2347
160.3	0.5422	0.376	0.2594	0.2845	0.3596	0.5669	0.2341
160.4	0.5422	0.3767	0.2527	0.2859	0.3602	0.5662	0.2335
160.5	0.5415	0.374	0.2569	0.2845	0.3613	0.564	0.2329
160.6	0.5415	0.3733	0.2611	0.2867	0.3602	0.5655	0.2341
160.7	0.5409	0.374	0.2628	0.2859	0.3631	0.5669	0.2311
160.8	0.5415	0.376	0.262	0.2852	0.3619	0.5647	0.2311
160.9	0.5422	0.3773	0.2628	0.2881	0.3625	0.5647	0.2329
161	0.5409	0.3746	0.2637	0.2867	0.3619	0.5632	0.2317
161.1	0.5428	0.3753	0.2594	0.2859	0.3625	0.564	0.2311
161.2	0.5415	0.376	0.2628	0.2874	0.3613	0.5574	0.2323
161.3	0.5409	0.376	0.2611	0.2867	0.3602	0.5603	0.2323
161.4	0.5428	0.3753	0.2628	0.2881	0.3613	0.5655	0.2323
161.5	0.5428	0.374	0.2628	0.2881	0.3619	0.5632	0.2305
161.6	0.5409	0.376	0.2645	0.2867	0.3608	0.561	0.2293
161.7	0.5415	0.3787	0.2654	0.2889	0.3625	0.564	0.2317
161.8	0.5415	0.3746	0.2611	0.2896	0.3613	0.5625	0.2335
161.9	0.5409	0.378	0.2637	0.2889	0.3637	0.5596	0.2365
162	0.5402	0.3767	0.2628	0.2881	0.3613	0.5632	0.2341
162.1	0.5422	0.38	0.2594	0.2896	0.3625	0.5662	0.2305
162.2	0.5441	0.3787	0.2654	0.2903	0.3648	0.5647	0.2317
162.3	0.5461	0.3793	0.2679	0.2889	0.3648	0.5625	0.2305
162.4	0.5454	0.3773	0.2611	0.2896	0.3643	0.561	0.2311
162.5	0.5448	0.3767	0.2637	0.2903	0.3643	0.561	0.2323
162.6	0.5461	0.3773	0.2662	0.2889	0.3625	0.564	0.2323
162.7	0.5467	0.3793	0.2645	0.2903	0.3643	0.5655	0.2305
162.8	0.5454	0.38	0.2654	0.2896	0.3637	0.5603	0.2335
162.9	0.5448	0.382	0.267	0.2903	0.3637	0.5588	0.2311
163	0.5441	0.38	0.2637	0.2933	0.3643	0.564	0.2323
163.1	0.5467	0.38	0.2662	0.2918	0.3637	0.5618	0.2293
163.2	0.5467	0.38	0.2679	0.2911	0.3625	0.5588	0.2329
163.3	0.5454	0.3814	0.2637	0.2918	0.3625	0.564	0.2323
163.4	0.5448	0.3827	0.2654	0.2918	0.3625	0.5625	0.2341
163.5	0.5441	0.3814	0.267	0.2925	0.3654	0.5588	0.2347
163.6	0.5467	0.3827	0.2654	0.2911	0.3643	0.561	0.2347
163.7	0.548	0.3834	0.2696	0.2911	0.3643	0.5581	0.2311
163.8	0.548	0.3814	0.2662	0.2918	0.3648	0.5588	0.2317
163.9	0.5493	0.3827	0.2654	0.294	0.3654	0.564	0.2311
164	0.5454	0.3807	0.2679	0.2925	0.3648	0.5625	0.2317
164.1	0.5461	0.3807	0.2637	0.294	0.3654	0.5662	0.2317
164.2	0.5473	0.382	0.2645	0.2947	0.3643	0.5574	0.2335
164.3	0.548	0.382	0.2679	0.2911	0.3666	0.5618	0.2365
164.4	0.5473	0.382	0.2679	0.294	0.3654	0.5669	0.2353
164.5	0.548	0.3814	0.2654	0.2947	0.3643	0.5647	0.2413
164.6	0.548	0.3827	0.2704	0.2925	0.3648	0.5655	0.2431
164.7	0.55	0.3807	0.2696	0.294	0.3637	0.5632	0.2419
164.8	0.55	0.382	0.2704	0.2933	0.366	0.5647	0.2419
164.9	0.548	0.3827	0.2738	0.2918	0.366	0.5625	0.2431
165	0.5467	0.382	0.2713	0.2947	0.3643	0.5691	0.2431
165.1	0.5467	0.3834	0.267	0.2933	0.3643	0.5721	0.2426
165.2	0.5448	0.3827	0.2713	0.2918	0.3648	0.561	0.2419
165.3	0.5461	0.3814	0.2721	0.294	0.3637	0.5669	0.2426
165.4	0.5461	0.38	0.2687	0.2903	0.3654	0.5677	0.2426
165.5	0.5493	0.3834	0.2687	0.2918	0.3654	0.5647	0.2437
165.6	0.5486	0.382	0.2704	0.2903	0.366	0.5655	0.2486
165.7	0.5512	0.3834	0.2645	0.2918	0.3666	0.5662	0.245
165.8	0.5486	0.38	0.2696	0.2896	0.3672	0.564	0.2401
165.9	0.5473	0.3793	0.2704	0.2918	0.3689	0.5647	0.2407
166	0.5493	0.378	0.2696	0.2896	0.3672	0.5632	0.2419
166.1	0.5461	0.3814	0.2713	0.2911	0.3689	0.5713	0.2413
166.2	0.548	0.3827	0.2755	0.2903	0.366	0.5625	0.2401
166.3	0.5486	0.3834	0.2687	0.2911	0.3684	0.5677	0.2383
166.4	0.5467	0.384	0.2738	0.2933	0.3684	0.564	0.2389
166.5	0.5467	0.3854	0.2704	0.2896	0.3684	0.5669	0.2395
166.6	0.5467	0.384	0.2713	0.2947	0.3678	0.5647	0.2401
166.7	0.5493	0.382	0.273	0.2925	0.3672	0.5625	0.2413
166.8	0.5467	0.382	0.2738	0.2918	0.3689	0.5684	0.2401
166.9	0.548	0.3827	0.2713	0.294	0.3672	0.5632	0.2407
167	0.548	0.3847	0.2746	0.2954	0.3678	0.5677	0.2401
167.1	0.5473	0.3827	0.2721	0.2925	0.3689	0.5662	0.2407
167.2	0.5486	0.3827	0.267	0.2933	0.3695	0.5581	0.2413
167.3	0.5486	0.3854	0.2721	0.2947	0.3684	0.5647	0.2413
167.4	0.5519	0.384	0.273	0.2911	0.3695	0.5625	0.2431
167.5	0.5512	0.3834	0.273	0.294	0.3701	0.561	0.2407
167.6	0.5538	0.384	0.2721	0.2962	0.3695	0.5655	0.2431
167.7	0.5525	0.3854	0.2746	0.2918	0.3701	0.5603	0.2426
167.8	0.5506	0.3854	0.2713	0.2962	0.3713	0.5669	0.2413
167.9	0.5519	0.3861	0.2704	0.2947	0.373	0.5655	0.2401
168	0.5525	0.3854	0.2713	0.2947	0.3713	0.5655	0.2413
168.1	0.5512	0.3867	0.2696	0.2962	0.3719	0.5684	0.2407
168.2	0.5512	0.3867	0.2713	0.2962	0.3725	0.5596	0.2407
168.3	0.5525	0.3874	0.273	0.294	0.3707	0.5662	0.2401
168.4	0.5538	0.3854	0.2721	0.294	0.3707	0.5632	0.2401
168.5	0.5519	0.3874	0.2713	0.2999	0.3695	0.5655	0.2389
168.6	0.5538	0.3861	0.2755	0.2969	0.3701	0.5647	0.2389
168.7	0.5538	0.3834	0.2755	0.2954	0.3707	0.564	0.2383
168.8	0.5538	0.3861	0.273	0.2977	0.3719	0.5684	0.2371
168.9	0.5525	0.3854	0.273	0.2991	0.3707	0.5662	0.2383
169	0.5538	0.3861	0.2755	0.2969	0.3713	0.5647	0.2383
169.1	0.5551	0.3874	0.2696	0.2969	0.3725	0.5603	0.2389
169.2	0.5564	0.3888	0.2704	0.2984	0.3719	0.5721	0.2383
169.3	0.5538	0.3867	0.273	0.3006	0.3725	0.5647	0.2371
169.4	0.5519	0.3874	0.2704	0.2984	0.3707	0.5655	0.2359
169.5	0.5558	0.3874	0.2704	0.2947	0.3701	0.5632	0.2347
169.6	0.5545	0.3881	0.2721	0.2933	0.3695	0.5647	0.2353
169.7	0.5564	0.3894	0.2696	0.2977	0.3695	0.5647	0.2353
169.8	0.5545	0.3874	0.273	0.3021	0.3713	0.5677	0.2347
169.9	0.5545	0.3894	0.2746	0.2962	0.3707	0.5677	0.2353
170	0.5519	0.3894	0.2696	0.2918	0.3713	0.5655	0.2347
170.1	0.5506	0.3894	0.2738	0.2918	0.3707	0.5728	0.2359
170.2	0.5532	0.3901	0.2738	0.2984	0.3689	0.5677	0.2359
170.3	0.5525	0.3894	0.2713	0.2962	0.3707	0.5662	0.2323
170.4	0.5532	0.3888	0.2755	0.2954	0.3689	0.5706	0.2347
170.5	0.5551	0.3881	0.2746	0.2954	0.3695	0.5669	0.2347
170.6	0.5545	0.3874	0.273	0.2962	0.3713	0.5655	0.2347
170.7	0.5551	0.3867	0.278	0.2954	0.3701	0.5684	0.2347
170.8	0.5578	0.3874	0.2772	0.2954	0.3689	0.5662	0.2347
170.9	0.559	0.3874	0.2721	0.2991	0.3695	0.5655	0.2353
171	0.5564	0.3894	0.2746	0.2933	0.3742	0.5706	0.2377
171.1	0.5584	0.3861	0.2746	0.2954	0.3713	0.5691	0.2341
171.2	0.5571	0.3854	0.273	0.2977	0.3736	0.5669	0.2323
171.3	0.5558	0.3894	0.2738	0.2969	0.3754	0.5691	0.2347
171.4	0.5571	0.3881	0.2772	0.2977	0.376	0.5699	0.2347
171.5	0.5578	0.3901	0.2738	0.2977	0.3725	0.5713	0.2341
171.6	0.5571	0.3888	0.2746	0.2969	0.3707	0.5728	0.2305
171.7	0.5571	0.3874	0.2746	0.2977	0.3725	0.5706	0.2305
171.8	0.5571	0.3861	0.2704	0.3006	0.3725	0.5699	0.2305
171.9	0.5571	0.3867	0.2738	0.2991	0.3701	0.5743	0.2311
172	0.5584	0.3888	0.2755	0.3013	0.3736	0.5736	0.2335
172.1	0.5564	0.3867	0.2687	0.3021	0.373	0.5713	0.2365
172.2	0.5564	0.3881	0.273	0.3006	0.3742	0.5743	0.2359
172.3	0.5558	0.3861	0.2687	0.3043	0.376	0.5736	0.2383
172.4	0.5564	0.3888	0.2679	0.305	0.3754	0.5772	0.2401
172.5	0.5564	0.3894	0.2721	0.3028	0.376	0.5706	0.2389
172.6	0.5578	0.3894	0.2696	0.3035	0.3736	0.5743	0.2389
172.7	0.5617	0.3901	0.267	0.3035	0.3742	0.5743	0.2377
172.8	0.5617	0.382	0.273	0.3021	0.3748	0.5721	0.2365
172.9	0.5604	0.382	0.273	0.3065	0.3754	0.5743	0.2377
173	0.5617	0.3814	0.273	0.3035	0.3766	0.575	0.2383
173.1	0.5597	0.382	0.2713	0.3028	0.3783	0.5795	0.2359
173.2	0.5617	0.3814	0.2721	0.3057	0.376	0.5758	0.2353
173.3	0.5604	0.3834	0.2704	0.3028	0.3766	0.5721	0.2359
173.4	0.561	0.382	0.2738	0.3028	0.3748	0.5706	0.2347
173.5	0.561	0.3847	0.273	0.3072	0.3748	0.5758	0.2329
173.6	0.5604	0.3807	0.273	0.3021	0.376	0.5787	0.2317
173.7	0.561	0.3834	0.2797	0.3043	0.3742	0.575	0.2329
173.8	0.559	0.3834	0.2704	0.3035	0.3754	0.5765	0.2335
173.9	0.561	0.3834	0.2696	0.3043	0.3736	0.5802	0.2311
174	0.5617	0.3814	0.2713	0.3035	0.376	0.5772	0.2347
174.1	0.563	0.3807	0.273	0.3057	0.3754	0.5699	0.2347
174.2	0.5604	0.38	0.2696	0.3072	0.3748	0.5847	0.2365
174.3	0.563	0.382	0.2713	0.3043	0.3748	0.5772	0.2365
174.4	0.5623	0.3814	0.2704	0.3087	0.3771	0.5787	0.2371
174.5	0.563	0.382	0.267	0.3057	0.3777	0.5772	0.2359
174.6	0.563	0.3814	0.2713	0.3057	0.376	0.5772	0.2353
174.7	0.5643	0.3793	0.2704	0.3087	0.3766	0.5772	0.2365
174.8	0.5617	0.3787	0.2662	0.3065	0.3736	0.5787	0.2365
174.9	0.5656	0.3787	0.2721	0.3094	0.376	0.5787	0.2371
175	0.5636	0.3807	0.2687	0.3102	0.376	0.5809	0.2371
175.1	0.5617	0.3807	0.267	0.3065	0.3771	0.5787	0.2365
175.2	0.5623	0.3834	0.273	0.3116	0.3771	0.578	0.2365
175.3	0.5636	0.382	0.2696	0.3094	0.3771	0.5795	0.2347
175.4	0.5636	0.3827	0.2696	0.3072	0.3766	0.5765	0.2365
175.5	0.5643	0.3834	0.2721	0.3102	0.376	0.5765	0.2377
175.6	0.5643	0.3847	0.2721	0.3124	0.3777	0.578	0.2377
175.7	0.5643	0.3854	0.2738	0.3079	0.3742	0.575	0.2377
175.8	0.5643	0.3854	0.2746	0.3124	0.376	0.5809	0.2383
175.9	0.5643	0.3861	0.273	0.3109	0.376	0.5787	0.2395
176	0.5649	0.3874	0.2704	0.3102	0.376	0.5758	0.2413
176.1	0.5656	0.3867	0.2763	0.3124	0.376	0.5802	0.2413
176.2	0.5649	0.3867	0.273	0.3116	0.376	0.5802	0.2407
176.3	0.5643	0.3881	0.273	0.3131	0.3766	0.5795	0.2426
176.4	0.5662	0.3894	0.2772	0.3146	0.3789	0.578	0.2395
176.5	0.5623	0.3874	0.2763	0.3153	0.3783	0.5787	0.2395
176.6	0.5636	0.3901	0.2763	0.3124	0.3771	0.5802	0.2371
176.7	0.5643	0.3921	0.2738	0.3146	0.3795	0.5817	0.2359
176.8	0.5656	0.3935	0.2713	0.3153	0.3789	0.5824	0.2353
176.9	0.5643	0.3921	0.2721	0.3138	0.3801	0.5809	0.2365
177	0.563	0.3942	0.2738	0.3161	0.3783	0.5809	0.2401
177.1	0.5649	0.3928	0.273	0.3175	0.3795	0.5728	0.2419
177.2	0.5649	0.3955	0.2755	0.3146	0.3789	0.5809	0.2419
177.3	0.5643	0.3942	0.2763	0.3153	0.3777	0.5817	0.2419
177.4	0.5656	0.3962	0.2746	0.3146	0.3783	0.5817	0.2431
177.5	0.5649	0.3955	0.2746	0.3124	0.376	0.5787	0.2426
177.6	0.5662	0.3955	0.2746	0.3138	0.3783	0.578	0.2437
177.7	0.5669	0.3969	0.2713	0.3153	0.3783	0.5802	0.2431
177.8	0.5669	0.3969	0.2721	0.3131	0.3783	0.5758	0.2426
177.9	0.5649	0.3948	0.2746	0.3116	0.3807	0.5795	0.2437
178	0.5662	0.3948	0.2713	0.3153	0.3818	0.578	0.2437
178.1	0.563	0.3948	0.2738	0.3116	0.3807	0.5861	0.2437
178.2	0.5656	0.3982	0.2772	0.3138	0.3795	0.5824	0.245
178.3	0.5669	0.3975	0.2738	0.3153	0.3795	0.5809	0.2431
178.4	0.5656	0.3948	0.278	0.3124	0.3818	0.5817	0.2431
178.5	0.5662	0.3955	0.2797	0.3138	0.3801	0.5817	0.2456
178.6	0.5662	0.3955	0.2763	0.3175	0.3795	0.5847	0.2444
178.7	0.5656	0.3989	0.2789	0.3153	0.3824	0.5824	0.2437
178.8	0.5656	0.3962	0.278	0.3161	0.3807	0.5839	0.2437
178.9	0.5682	0.3969	0.2789	0.3153	0.3807	0.5839	0.2437
179	0.5662	0.3962	0.284	0.3183	0.3824	0.5861	0.2437
179.1	0.5649	0.3969	0.2814	0.3153	0.3818	0.5898	0.2444
179.2	0.5662	0.3955	0.2814	0.3183	0.3818	0.5884	0.2444
179.3	0.5682	0.3955	0.2857	0.3183	0.3818	0.5861	0.2431
179.4	0.5675	0.3975	0.2823	0.3175	0.3813	0.5891	0.2444
179.5	0.5682	0.3962	0.2823	0.3183	0.3824	0.5876	0.245
179.6	0.5662	0.3948	0.2831	0.3212	0.3836	0.5847	0.2444
179.7	0.5662	0.3942	0.2746	0.3183	0.3818	0.5854	0.2468
179.8	0.5656	0.3955	0.2814	0.3227	0.3824	0.5854	0.2474
179.9	0.5656	0.3975	0.2823	0.319	0.3818	0.5869	0.2474
180	0.5669	0.3962	0.2789	0.3198	0.3813	0.5839	0.2474
180.1	0.5662	0.3955	0.2763	0.3235	0.3813	0.5921	0.2456
180.2	0.5662	0.3948	0.2797	0.322	0.3813	0.5898	0.2462
180.3	0.5662	0.3962	0.2806	0.3212	0.3824	0.5891	0.2468
180.4	0.5682	0.3955	0.2789	0.3235	0.3824	0.5876	0.2474
180.5	0.5662	0.3948	0.2789	0.322	0.383	0.5869	0.2462
180.6	0.5649	0.3962	0.2789	0.322	0.3848	0.5913	0.2444
180.7	0.5669	0.3962	0.2797	0.3249	0.3818	0.5884	0.2456
180.8	0.5656	0.3969	0.2814	0.3198	0.3813	0.5906	0.2437
180.9	0.5662	0.3975	0.2831	0.3205	0.3836	0.5891	0.2431
181	0.5649	0.3975	0.2814	0.3235	0.3813	0.5884	0.245
181.1	0.5669	0.3969	0.2814	0.322	0.3824	0.5891	0.2468
181.2	0.5675	0.3975	0.2831	0.3227	0.3818	0.5928	0.2456
181.3	0.5669	0.3969	0.284	0.3212	0.3842	0.5921	0.2462
181.4	0.5669	0.3962	0.2789	0.3249	0.3807	0.5936	0.2444
181.5	0.5675	0.3962	0.2797	0.3227	0.383	0.5898	0.2486
181.6	0.5675	0.3975	0.284	0.3205	0.3842	0.5898	0.2492
181.7	0.5669	0.3969	0.2806	0.3242	0.3818	0.5965	0.2498
181.8	0.5662	0.3955	0.2806	0.3235	0.3818	0.5943	0.2498
181.9	0.5682	0.3955	0.2814	0.3198	0.383	0.5943	0.2504
182	0.5649	0.3948	0.2806	0.3257	0.3813	0.5928	0.2498
182.1	0.5695	0.3975	0.278	0.3235	0.3818	0.5995	0.2498
182.2	0.5702	0.3969	0.2806	0.3212	0.3813	0.5965	0.2492
182.3	0.5682	0.3975	0.2814	0.3227	0.3813	0.5936	0.2492
182.4	0.5702	0.3948	0.2797	0.3227	0.383	0.5936	0.2504
182.5	0.5688	0.3975	0.2814	0.3205	0.383	0.5965	0.2498
182.6	0.5695	0.3955	0.284	0.3227	0.3836	0.5943	0.251
182.7	0.5688	0.3996	0.2814	0.3227	0.383	0.5958	0.2516
182.8	0.5682	0.3989	0.2823	0.3227	0.3842	0.595	0.254
182.9	0.5702	0.3982	0.2848	0.3279	0.3854	0.5913	0.2534
183	0.5688	0.3962	0.2789	0.3272	0.3842	0.5965	0.2534
183.1	0.5702	0.3989	0.2848	0.3264	0.3848	0.5921	0.2552
183.2	0.5675	0.3989	0.2848	0.3294	0.3848	0.5921	0.254
183.3	0.5688	0.4002	0.2814	0.3272	0.3842	0.5936	0.2528
183.4	0.5682	0.3982	0.284	0.3272	0.3854	0.5921	0.2522
183.5	0.5688	0.3975	0.2806	0.3279	0.383	0.5943	0.2552
183.6	0.5702	0.3982	0.2806	0.3286	0.3848	0.595	0.2552
183.7	0.5702	0.3975	0.2797	0.3279	0.386	0.5943	0.2534
183.8	0.5688	0.3962	0.2797	0.3279	0.3848	0.5928	0.2534
183.9	0.5721	0.3989	0.278	0.3294	0.3848	0.5913	0.2552
184	0.5708	0.3969	0.2831	0.3279	0.386	0.5884	0.2558
184.1	0.5715	0.3969	0.2746	0.3279	0.386	0.5943	0.254
184.2	0.5702	0.3996	0.2789	0.3301	0.3871	0.5928	0.2534
184.3	0.5702	0.4009	0.2814	0.3309	0.3871	0.5965	0.2534
184.4	0.5721	0.4016	0.2789	0.3294	0.3889	0.5913	0.2516
184.5	0.5702	0.4002	0.2831	0.3279	0.3877	0.5921	0.2522
184.6	0.5728	0.4009	0.2806	0.3309	0.3866	0.5958	0.2522
184.7	0.5715	0.4043	0.2789	0.3294	0.3883	0.5943	0.254
184.8	0.5734	0.405	0.2831	0.3301	0.3877	0.5921	0.2504
184.9	0.5734	0.4043	0.2806	0.3309	0.3871	0.5973	0.2522
185	0.5728	0.4029	0.2797	0.3294	0.3889	0.5958	0.2504
185.1	0.5708	0.4029	0.2823	0.3294	0.3895	0.5921	0.2534
185.2	0.5734	0.4023	0.2814	0.3294	0.3889	0.5921	0.251
185.3	0.5734	0.4023	0.2806	0.3316	0.3889	0.5936	0.2534
185.4	0.5708	0.4029	0.2831	0.3301	0.3889	0.5898	0.2522
185.5	0.5747	0.4063	0.2814	0.3301	0.3866	0.5973	0.2522
185.6	0.5734	0.4063	0.2789	0.3338	0.3871	0.5928	0.2522
185.7	0.5747	0.4043	0.2848	0.3323	0.3889	0.5891	0.2552
185.8	0.5734	0.4043	0.2789	0.3301	0.3871	0.598	0.2528
185.9	0.5747	0.4029	0.2789	0.3353	0.3877	0.5898	0.2528
186	0.5747	0.4029	0.2831	0.3331	0.3877	0.5906	0.2546
186.1	0.5728	0.4002	0.2814	0.3316	0.3877	0.5906	0.2528
186.2	0.5754	0.4036	0.2789	0.3353	0.3883	0.5921	0.257
186.3	0.5747	0.4023	0.2848	0.3353	0.3889	0.5898	0.2576
186.4	0.5754	0.4029	0.284	0.3338	0.3895	0.5958	0.2576
186.5	0.576	0.4057	0.2806	0.3338	0.3883	0.598	0.2582
186.6	0.576	0.4029	0.2857	0.3368	0.3871	0.5965	0.257
186.7	0.5747	0.4036	0.2848	0.3338	0.3883	0.595	0.2576
186.8	0.5741	0.4063	0.2823	0.3346	0.3854	0.5921	0.2595
186.9	0.576	0.4077	0.2874	0.3375	0.3883	0.5958	0.2558
187	0.5754	0.4077	0.2848	0.3353	0.3907	0.5921	0.2576
187.1	0.5741	0.4084	0.2848	0.3353	0.3877	0.595	0.257
187.2	0.5767	0.4077	0.2874	0.3346	0.3877	0.5943	0.2558
187.3	0.5767	0.4063	0.284	0.3316	0.3895	0.5898	0.2558
187.4	0.5767	0.4111	0.2865	0.3331	0.3889	0.598	0.257
187.5	0.576	0.4097	0.2848	0.3338	0.3889	0.5921	0.2558
187.6	0.576	0.4077	0.284	0.3338	0.3871	0.5936	0.257
187.7	0.576	0.4077	0.2857	0.3338	0.3889	0.5943	0.2552
187.8	0.5734	0.407	0.2882	0.3353	0.3895	0.5884	0.2564
187.9	0.5754	0.4077	0.284	0.3331	0.3907	0.5928	0.2546
188	0.576	0.409	0.284	0.3338	0.3877	0.5943	0.2546
188.1	0.5747	0.4077	0.2874	0.3361	0.3883	0.5958	0.2564
188.2	0.5754	0.409	0.2874	0.3353	0.3889	0.5928	0.2546
188.3	0.5754	0.409	0.2865	0.3346	0.3901	0.5906	0.2546
188.4	0.5741	0.409	0.2891	0.3353	0.3901	0.5906	0.2534
188.5	0.5767	0.4077	0.2865	0.3353	0.3913	0.5891	0.2486
188.6	0.5747	0.4084	0.2874	0.3361	0.3913	0.5936	0.2564
188.7	0.5754	0.409	0.2908	0.339	0.3919	0.595	0.257
188.8	0.5741	0.409	0.2874	0.3338	0.3919	0.5869	0.257
188.9	0.5774	0.4084	0.2857	0.3353	0.3907	0.5943	0.2595
189	0.5767	0.4084	0.2874	0.3383	0.3901	0.5913	0.2607
189.1	0.5767	0.4104	0.2899	0.3353	0.3901	0.5906	0.2595
189.2	0.5787	0.4111	0.2857	0.3353	0.3901	0.5943	0.2589
189.3	0.5787	0.4097	0.2874	0.3361	0.3913	0.5906	0.2601
189.4	0.5787	0.4063	0.2857	0.3361	0.393	0.5898	0.2601
189.5	0.578	0.407	0.2882	0.3361	0.3919	0.5965	0.2613
189.6	0.5806	0.4097	0.2891	0.3383	0.3924	0.5876	0.2625
189.7	0.5813	0.409	0.2874	0.3361	0.3913	0.5928	0.2631
189.8	0.578	0.409	0.2891	0.3361	0.3919	0.5891	0.2619
189.9	0.5806	0.4063	0.2891	0.3368	0.3919	0.5921	0.2625
190	0.5806	0.409	0.2865	0.3368	0.3907	0.5913	0.2631
190.1	0.58	0.4084	0.2865	0.3375	0.3907	0.5906	0.2637
190.2	0.578	0.409	0.2891	0.3361	0.3895	0.5906	0.2631
190.3	0.582	0.4077	0.284	0.3353	0.3913	0.5906	0.2637
190.4	0.5806	0.405	0.2874	0.3375	0.3919	0.5884	0.2649
190.5	0.58	0.4084	0.2891	0.3368	0.3924	0.5913	0.2649
190.6	0.5813	0.4077	0.2831	0.3346	0.393	0.5884	0.2643
190.7	0.5806	0.407	0.2865	0.3338	0.3942	0.5921	0.2625
190.8	0.582	0.4063	0.284	0.3353	0.3924	0.5943	0.2625
190.9	0.5793	0.4057	0.2857	0.3368	0.3924	0.5987	0.2631
191	0.5813	0.4063	0.2865	0.3353	0.3924	0.5965	0.2649
191.1	0.5813	0.4063	0.284	0.339	0.3936	0.5943	0.2631
191.2	0.5813	0.4057	0.2874	0.3405	0.393	0.5921	0.2625
191.3	0.582	0.407	0.2899	0.3398	0.393	0.5973	0.2613
191.4	0.5806	0.409	0.2857	0.3428	0.3919	0.5936	0.2625
191.5	0.582	0.4097	0.2831	0.3398	0.3924	0.5928	0.2625
191.6	0.58	0.4077	0.2865	0.3398	0.3919	0.595	0.2601
191.7	0.58	0.407	0.2857	0.3375	0.3924	0.5943	0.2613
191.8	0.5806	0.409	0.2848	0.3405	0.3913	0.5906	0.2601
191.9	0.5813	0.4111	0.2899	0.3398	0.3907	0.595	0.2607
192	0.5787	0.407	0.2874	0.3398	0.3942	0.5913	0.2613
192.1	0.5813	0.4111	0.2865	0.3405	0.3936	0.5928	0.2613
192.2	0.5806	0.409	0.295	0.3383	0.3924	0.5913	0.2613
192.3	0.58	0.409	0.2882	0.3405	0.3924	0.5928	0.2619
192.4	0.5806	0.4077	0.2891	0.3413	0.3936	0.598	0.2631
192.5	0.5813	0.407	0.2925	0.3405	0.3913	0.5936	0.2625
192.6	0.582	0.4084	0.2882	0.3413	0.3907	0.5921	0.2613
192.7	0.5806	0.4077	0.2891	0.3435	0.3924	0.5987	0.2625
192.8	0.5806	0.4077	0.2967	0.3405	0.3924	0.5921	0.2655
192.9	0.58	0.4077	0.2899	0.3405	0.3919	0.5936	0.2655
193	0.58	0.409	0.2925	0.342	0.3924	0.5958	0.2655
193.1	0.58	0.4097	0.2933	0.3428	0.3924	0.5913	0.2649
193.2	0.5793	0.409	0.2882	0.3398	0.3924	0.5898	0.2655
193.3	0.5793	0.4104	0.2916	0.345	0.3924	0.598	0.2655
193.4	0.58	0.409	0.2916	0.342	0.3924	0.5913	0.2643
193.5	0.5787	0.4104	0.2874	0.3413	0.3901	0.5987	0.2649
193.6	0.58	0.4097	0.2908	0.3443	0.3913	0.5921	0.2661
193.7	0.5806	0.4104	0.2899	0.345	0.393	0.5958	0.2643
193.8	0.58	0.4104	0.2916	0.342	0.3936	0.595	0.2637
193.9	0.5806	0.4111	0.2882	0.3443	0.3936	0.5943	0.2649
194	0.5806	0.4104	0.2848	0.3435	0.393	0.5973	0.2643
194.1	0.58	0.4104	0.2857	0.3435	0.393	0.5936	0.2643
194.2	0.5806	0.4111	0.2874	0.342	0.3942	0.601	0.2655
194.3	0.5813	0.4111	0.2874	0.345	0.3948	0.595	0.2643
194.4	0.5806	0.4111	0.2848	0.3428	0.3954	0.5965	0.2661
194.5	0.5806	0.4118	0.2874	0.342	0.3948	0.5958	0.2661
194.6	0.58	0.4138	0.2865	0.3465	0.3942	0.5987	0.2667
194.7	0.58	0.4138	0.2874	0.3443	0.3948	0.6017	0.2655
194.8	0.5813	0.4145	0.2908	0.3457	0.3942	0.5995	0.2661
194.9	0.5813	0.4152	0.2882	0.345	0.3966	0.595	0.268
195	0.5806	0.4138	0.2848	0.3443	0.3954	0.601	0.2661
195.1	0.5833	0.4152	0.2882	0.3457	0.396	0.5973	0.2692
195.2	0.582	0.4158	0.2874	0.345	0.3972	0.6002	0.268
195.3	0.5826	0.4158	0.2865	0.3443	0.3984	0.5965	0.2686
195.4	0.5806	0.4186	0.2891	0.3487	0.3966	0.6002	0.268
195.5	0.5826	0.4152	0.2823	0.3443	0.3966	0.6054	0.2698
195.6	0.5813	0.4172	0.2865	0.3435	0.3978	0.601	0.2698
195.7	0.5813	0.4152	0.2882	0.3457	0.3966	0.5987	0.268
195.8	0.5833	0.4165	0.2857	0.3465	0.3954	0.5987	0.2673
195.9	0.5833	0.4158	0.2874	0.3435	0.3966	0.5987	0.2686
196	0.5839	0.4152	0.2891	0.3443	0.3966	0.6017	0.2698
196.1	0.582	0.4165	0.2848	0.3457	0.3984	0.6017	0.2722
196.2	0.5839	0.4179	0.284	0.3457	0.3978	0.598	0.2686
196.3	0.5806	0.4186	0.2891	0.3457	0.3995	0.6002	0.2704
196.4	0.5806	0.4206	0.2882	0.3443	0.3995	0.601	0.271
196.5	0.5793	0.4199	0.2831	0.345	0.3978	0.5973	0.2716
196.6	0.582	0.4179	0.2882	0.3428	0.3978	0.5965	0.2716
196.7	0.58	0.422	0.2857	0.3428	0.399	0.601	0.2716
196.8	0.5813	0.4165	0.2857	0.342	0.3978	0.601	0.2728
196.9	0.5833	0.4192	0.2865	0.3435	0.3972	0.5973	0.2734
197	0.5826	0.4213	0.2891	0.3443	0.399	0.598	0.2722
197.1	0.5826	0.4186	0.2882	0.3413	0.396	0.6025	0.2734
197.2	0.5813	0.4213	0.2857	0.3465	0.3966	0.6017	0.2698
197.3	0.5826	0.4199	0.2865	0.3465	0.3966	0.5995	0.2728
197.4	0.582	0.4199	0.2865	0.345	0.3966	0.6002	0.2716
197.5	0.5826	0.4186	0.2848	0.3465	0.3972	0.6002	0.2704
197.6	0.5826	0.4227	0.2865	0.348	0.3984	0.5958	0.2734
197.7	0.5826	0.4233	0.2857	0.3532	0.3995	0.5958	0.2704
197.8	0.582	0.4227	0.2882	0.3547	0.399	0.6002	0.2698
197.9	0.5846	0.4227	0.2857	0.351	0.3978	0.6017	0.2704
198	0.5833	0.4227	0.2857	0.345	0.399	0.598	0.2698
198.1	0.5833	0.4206	0.2891	0.3457	0.3978	0.6025	0.268
198.2	0.5839	0.4227	0.2857	0.3413	0.3972	0.6032	0.2704
198.3	0.5839	0.4206	0.2848	0.3375	0.3978	0.598	0.2686
198.4	0.5826	0.4213	0.2874	0.345	0.3995	0.5973	0.2673
198.5	0.5852	0.4206	0.2865	0.342	0.3978	0.6002	0.2692
198.6	0.5846	0.4206	0.2814	0.3361	0.3972	0.601	0.2692
198.7	0.5833	0.422	0.2857	0.3398	0.3978	0.5995	0.2728
198.8	0.5826	0.4186	0.2857	0.345	0.3972	0.6017	0.2728
198.9	0.5826	0.422	0.2814	0.3405	0.3972	0.598	0.2716
199	0.5833	0.4206	0.2874	0.3398	0.3984	0.5973	0.2722
199.1	0.5839	0.4233	0.2848	0.3346	0.3984	0.6002	0.271
199.2	0.5846	0.4206	0.2823	0.3368	0.399	0.6025	0.2722
199.3	0.5852	0.4213	0.2874	0.3368	0.3995	0.5943	0.274
199.4	0.5879	0.422	0.2865	0.3331	0.3984	0.5995	0.2734
199.5	0.5866	0.4206	0.2831	0.339	0.3995	0.6017	0.2771
199.6	0.5852	0.4233	0.2831	0.342	0.4001	0.6025	0.2746
199.7	0.5839	0.4199	0.2857	0.3405	0.4001	0.5995	0.274
199.8	0.5833	0.422	0.2865	0.339	0.3995	0.598	0.2746
[truncated: 4,435 more rows]
