# Supplementary material for: Divergent Cl- and H+ pathways underlie transport coupling and gating in CLC exchangers and channels
Source: eLife. 2020 Apr 28;9:e51224. doi: 10.7554/eLife.51224 (PMC7274781; doi:10.7554/eLife.51224)
Supplement: Figure 5—figure supplement 1—source data 1. [file elife-51224-fig5-figsupp1-data1.xlsx]

## Sheet: panel A
IV
	170913						170913
	103 Cl	17Cl	pH7.5	pH8.5			103 Cl	17Cl	pH7.5	pH8.5
	57	60	64	63			47	52	56	55
-80	-1.4736e-07	-1.69246e-07	-1.53322e-07	-2.02544e-07		-80	-1.18985e-07	-2.81197e-08	-3.78253e-08	-3.93078e-08
-70	-1.22392e-07	-1.36695e-07	-1.22942e-07	-1.55877e-07		-70	-1.12132e-07	-1.89686e-08	-2.74851e-08	-2.74797e-08
-60	-1.02389e-07	-1.06581e-07	-8.99371e-08	-1.17156e-07		-60	-9.91681e-08	-1.03669e-08	-1.8494e-08	-1.71182e-08
-50	-8.17033e-08	-7.93995e-08	-6.56623e-08	-7.77784e-08		-50	-7.61679e-08	-2.42108e-09	-9.51365e-09	-7.02858e-09
-40	-5.74765e-08	-5.2997e-08	-3.98784e-08	-3.96758e-08		-40	-4.86508e-08	3.24765e-09	-7.41254e-10	4.10623e-09
-30	-2.8541e-08	-2.72718e-08	-1.31719e-08	-3.56762e-09		-30	-1.41745e-08	1.10921e-08	8.50576e-09	1.45478e-08
-20	4.55418e-09	-5.86604e-10	1.47611e-08	3.88545e-08		-20	1.40572e-08	1.80247e-08	1.79874e-08	2.62052e-08
-10	4.51259e-08	2.23016e-08	4.41606e-08	8.87745e-08		-10	3.35164e-08	2.52186e-08	2.7821e-08	4.01344e-08
0	9.21982e-08	4.78882e-08	7.43227e-08	1.48166e-07		0	5.44902e-08	3.21779e-08	3.96651e-08	5.73699e-08
10	1.49749e-07	7.41361e-08	1.10399e-07	2.28882e-07		10	7.88129e-08	4.0161e-08	5.20638e-08	7.97515e-08
20	2.20083e-07	9.80269e-08	1.61428e-07	3.45153e-07		20	1.10708e-07	4.70563e-08	7.05685e-08	1.16276e-07
30	3.24515e-07	1.2315e-07	2.37964e-07	5.14612e-07		30	1.53696e-07	5.51088e-08	9.59898e-08	1.67737e-07
40	4.8149e-07	1.53141e-07	3.57333e-07	7.62996e-07		40	2.19155e-07	6.97739e-08	1.35676e-07	2.47696e-07
50	7.20744e-07	2.20302e-07	5.48757e-07	1.11433e-06		50	3.22595e-07	1.04847e-07	2.0288e-07	3.69219e-07
60	1.07247e-06	3.56485e-07	8.52304e-07	1.58152e-06		60	4.92875e-07	1.87905e-07	3.24019e-07	5.60906e-07
70	1.57435e-06	6.04677e-07	1.31671e-06	2.18816e-06		70	7.92353e-07	3.50443e-07	5.54933e-07	9.1058e-07
80	2.24995e-06	9.73016e-07	1.97245e-06	2.92884e-06		80	1.27489e-06	6.01237e-07	1.05578e-06	1.43734e-06
90	3.11712e-06	1.46694e-06	2.79836e-06	3.77723e-06		90	1.98841e-06	9.17353e-07	1.58807e-06	2.16502e-06
norm IV
	170913						170913
	103 Cl	17Cl	pH7.5	pH8.5			103 Cl	17Cl	pH7.5	pH8.5
	57	60	64	63			47	52	56	55
-80	-0.0472744	-0.0542956	-0.05479	-0.0723794		-80	-0.0598392	-0.0141418	-0.0238185	-0.024752
-70	-0.0392645	-0.0438529	-0.0439334	-0.0557028		-70	-0.0563929	-0.00953962	-0.0173073	-0.0173039
-60	-0.0328473	-0.034192	-0.0321392	-0.0418657		-60	-0.0498731	-0.00521367	-0.0116456	-0.0107793
-50	-0.0262111	-0.0254721	-0.0234646	-0.0277942		-50	-0.038306	-0.0012176	-0.00599072	-0.00442588
-40	-0.018439	-0.0170019	-0.0142506	-0.0141782		-40	-0.0244672	0.00163329	-0.000466766	0.00258568
-30	-0.00915618	-0.00874901	-0.00470701	-0.0012749		-30	-0.00712857	0.00557841	0.00535605	0.0091607
-20	0.00146102	-0.000188188	0.0052749	0.0138847		-20	0.00706956	0.00906492	0.0113266	0.0165013
-10	0.0144768	0.00715455	0.0157809	0.0317237		-10	0.0168559	0.0126828	0.0175188	0.0252725
0	0.029578	0.015363	0.0265594	0.0529472		0	0.0274039	0.0161828	0.024977	0.0361256
10	0.0480409	0.0237835	0.0394512	0.0817915		10	0.0396362	0.0201976	0.0327844	0.0502193
20	0.0706046	0.0314479	0.0576866	0.123341		20	0.0556768	0.0236653	0.0444368	0.0732184
30	0.104107	0.0395074	0.0850368	0.183897		30	0.0772959	0.027715	0.0604445	0.105623
40	0.154466	0.0491289	0.127693	0.272658		40	0.110217	0.0350904	0.0854349	0.155974
50	0.231221	0.0706747	0.196099	0.398209		50	0.162238	0.0527294	0.127753	0.232496
60	0.344057	0.114363	0.304572	0.565158		60	0.247875	0.0945004	0.204034	0.353201
70	0.505067	0.193986	0.470528	0.781943		70	0.398486	0.176243	0.34944	0.57339
80	0.721802	0.312152	0.704859	1.04663		80	0.641163	0.302371	0.664819	0.905089
90	1	0.470606	1	1.3498		90	1	0.461351	1	1.36331

## Sheet: panel B
IV
	170913						170913						170913						170915						170915
	103 Cl	17Cl	pH7.5	pH8.5			103 Cl	17Cl	pH7.5	pH8.5			103 Cl	17Cl	pH7.5	pH8.5			103 Cl	17Cl	pH7.5	pH8.5			103 Cl	17Cl	pH7.5	pH8.5
	38	39	41	43			27	28	21	26			31	32	33	34			18	19	21	22			23	25	26	27
-80	-8.06192e-07	-1.17442e-06	-6.7767e-07	-6.57408e-07		-80	-5.94864e-07	-1.21278e-06	-4.68013e-07	-5.60445e-07		-80	-2.45652e-07	-4.29103e-07	-2.93227e-07	-2.491e-07		-80	-1.51448e-06	-3.29179e-06	-1.54312e-06	-1.56032e-06		-80	-4.99912e-07	-1.02406e-06	-5.85859e-07	-5.92663e-07
-70	-6.82904e-07	-1.06772e-06	-5.73217e-07	-5.53835e-07		-70	-4.98023e-07	-1.08364e-06	-3.93132e-07	-4.6429e-07		-70	-2.0876e-07	-3.86654e-07	-2.4769e-07	-2.04134e-07		-70	-1.21311e-06	-2.79022e-06	-1.23255e-06	-1.25119e-06		-70	-4.02884e-07	-9.02293e-07	-4.71043e-07	-4.75927e-07
-60	-5.78091e-07	-9.72289e-07	-4.85014e-07	-4.52507e-07		-60	-4.17952e-07	-9.70302e-07	-3.27527e-07	-3.68438e-07		-60	-1.72565e-07	-3.42554e-07	-2.03054e-07	-1.58179e-07		-60	-9.63845e-07	-2.39281e-06	-9.73132e-07	-9.6625e-07		-60	-3.17908e-07	-7.91634e-07	-3.73577e-07	-3.69063e-07
-50	-4.74847e-07	-8.66919e-07	-3.9801e-07	-3.45132e-07		-50	-3.36141e-07	-8.50564e-07	-2.63023e-07	-2.66546e-07		-50	-1.34827e-07	-2.95275e-07	-1.57466e-07	-1.09715e-07		-50	-7.32493e-07	-2.03514e-06	-7.29932e-07	-6.80924e-07		-50	-2.37724e-07	-6.79406e-07	-2.80649e-07	-2.59307e-07
-40	-3.61844e-07	-7.47225e-07	-3.02585e-07	-2.29083e-07		-40	-2.49657e-07	-7.20785e-07	-1.91576e-07	-1.58522e-07		-40	-9.20516e-08	-2.41328e-07	-1.09728e-07	-5.7894e-08		-40	-4.97503e-07	-1.68242e-06	-4.84246e-07	-3.82385e-07		-40	-1.52816e-07	-5.61148e-07	-1.84351e-07	-1.44762e-07
-30	-2.40384e-07	-6.12221e-07	-2.0036e-07	-1.04025e-07		-30	-1.51501e-07	-5.78251e-07	-1.10115e-07	-4.07303e-08		-30	-4.81012e-08	-1.81039e-07	-5.72656e-08	-3.69565e-09		-30	-2.4178e-07	-1.32709e-06	-2.19586e-07	-6.50476e-08		-30	-5.9358e-08	-4.34042e-07	-8.15387e-08	-2.11345e-08
-20	-9.99049e-08	-4.62204e-07	-7.96298e-08	3.11107e-08		-20	-3.94395e-08	-4.24266e-07	-1.62262e-08	8.50577e-08		-20	2.48641e-09	-1.19538e-07	-2.0856e-09	5.25272e-08		-20	4.83492e-08	-9.54144e-07	8.09952e-08	2.8002e-07		-20	4.34613e-08	-2.9569e-07	3.28363e-08	1.11073e-07
-10	5.96264e-08	-2.99249e-07	5.39232e-08	1.79175e-07		-10	9.00917e-08	-2.60177e-07	9.45312e-08	2.27483e-07		-10	5.78702e-08	-5.12976e-08	5.72792e-08	1.15686e-07		-10	3.82653e-07	-5.6483e-07	4.27011e-07	6.60282e-07		-10	1.60211e-07	-1.48896e-07	1.61097e-07	2.55231e-07
0	2.42174e-07	-1.268e-07	2.07035e-07	3.4535e-07		0	2.39484e-07	-8.48743e-08	2.23502e-07	3.81508e-07		0	1.21135e-07	1.88553e-08	1.27748e-07	1.84416e-07		0	7.74348e-07	-1.48927e-07	8.25853e-07	1.08504e-06		0	2.92911e-07	5.15625e-09	3.05951e-07	4.14236e-07
10	4.42476e-07	5.15082e-08	3.76651e-07	5.23961e-07		10	4.04949e-07	9.6199e-08	3.66613e-07	5.55353e-07		10	1.89772e-07	9.21977e-08	2.03635e-07	2.60003e-07		10	1.22005e-06	2.91107e-07	1.28305e-06	1.56166e-06		10	4.43376e-07	1.67959e-07	4.65863e-07	5.8945e-07
20	6.69181e-07	2.41624e-07	5.67137e-07	7.2305e-07		20	5.92201e-07	2.88397e-07	5.26746e-07	7.47931e-07		20	2.66332e-07	1.68152e-07	2.8464e-07	3.44001e-07		20	1.72494e-06	7.62942e-07	1.80043e-06	2.0964e-06		20	6.09161e-07	3.40588e-07	6.46641e-07	7.83556e-07
30	9.16016e-07	4.44164e-07	7.7732e-07	9.47045e-07		30	7.99457e-07	4.96379e-07	7.06481e-07	9.67092e-07		30	3.48685e-07	2.51715e-07	3.74341e-07	4.37187e-07		30	2.30182e-06	1.27791e-06	2.3918e-06	2.70551e-06		30	7.95557e-07	5.25893e-07	8.45635e-07	1.00113e-06
40	1.18222e-06	6.64005e-07	1.01284e-06	1.20038e-06		40	1.03074e-06	7.2301e-07	9.08944e-07	1.21829e-06		40	4.42541e-07	3.40873e-07	4.74677e-07	5.42456e-07		40	2.95465e-06	1.84407e-06	3.06442e-06	3.39581e-06		40	1.00515e-06	7.28091e-07	1.06848e-06	1.24671e-06
50	1.47961e-06	9.11593e-07	1.27815e-06	1.48788e-06		50	1.29355e-06	9.76715e-07	1.13973e-06	1.50129e-06		50	5.48162e-07	4.3823e-07	5.84891e-07	6.63927e-07		50	3.7015e-06	2.48359e-06	3.83289e-06	4.18347e-06		50	1.24269e-06	9.61243e-07	1.32e-06	1.5234e-06
60	1.8159e-06	1.19746e-06	1.58235e-06	1.82067e-06		60	1.59711e-06	1.26978e-06	1.40541e-06	1.82492e-06		60	6.66746e-07	5.48043e-07	7.11243e-07	8.03054e-07		60	4.55554e-06	3.21065e-06	4.72232e-06	5.08032e-06		60	1.52101e-06	1.24579e-06	1.62077e-06	1.84645e-06
70	2.20254e-06	1.53615e-06	1.94268e-06	2.20801e-06		70	1.9502e-06	1.60967e-06	1.71259e-06	2.20543e-06		70	8.01861e-07	6.78556e-07	8.57948e-07	9.67908e-07		70	5.53881e-06	4.02451e-06	5.73657e-06	6.09914e-06		70	1.85259e-06	1.58755e-06	1.98612e-06	2.23151e-06
80	2.66567e-06	1.92816e-06	2.37126e-06	2.66143e-06		80	2.37605e-06	2.01088e-06	2.08354e-06	2.64517e-06		80	9.61192e-07	8.3302e-07	1.04366e-06	1.16417e-06		80	6.64207e-06	4.91654e-06	6.8669e-06	7.23012e-06		80	2.26467e-06	1.98658e-06	2.43758e-06	2.69513e-06
90	3.20154e-06	2.37835e-06	2.86892e-06	3.19212e-06		90	2.8749e-06	2.46993e-06	2.51844e-06	3.15064e-06		90	1.15725e-06	1.00891e-06	1.26454e-06	1.40712e-06		90	7.90055e-06	5.88677e-06	8.11449e-06	8.48072e-06		90	2.77085e-06	2.44603e-06	2.97151e-06	3.23397e-06
norm IV
	170913						170913						170913						170915						170915
	103 Cl	17Cl	pH7.5	pH8.5			103 Cl	17Cl	pH7.5	pH8.5			103 Cl	17Cl	pH7.5	pH8.5			103 Cl	17Cl	pH7.5	pH8.5			103 Cl	17Cl	pH7.5	pH8.5
	38	39	41	43			27	28	21	26			31	32	33	34			18	19	21	22			23	25	26	27
-80	-0.251814	-0.36683	-0.236211	-0.229148		-80	-0.206916	-0.421849	-0.185834	-0.222536		-80	-0.212272	-0.370795	-0.231884	-0.196988		-80	-0.191694	-0.416653	-0.190168	-0.192288		-80	-0.180418	-0.369584	-0.197159	-0.199448
-70	-0.213305	-0.333501	-0.199802	-0.193046		-70	-0.173231	-0.37693	-0.156101	-0.184356		-70	-0.180393	-0.334114	-0.195874	-0.161429		-70	-0.153548	-0.353168	-0.151895	-0.154191		-70	-0.145401	-0.325637	-0.15852	-0.160163
-60	-0.180566	-0.303694	-0.169058	-0.157727		-60	-0.14538	-0.337508	-0.130051	-0.146296		-60	-0.149116	-0.296007	-0.160575	-0.125088		-60	-0.121997	-0.302867	-0.119925	-0.119077		-60	-0.114733	-0.2857	-0.125719	-0.1242
-50	-0.148318	-0.270782	-0.138731	-0.1203		-50	-0.116923	-0.295858	-0.104439	-0.105837		-50	-0.116506	-0.255152	-0.124524	-0.0867624		-50	-0.0927142	-0.257595	-0.0899541	-0.0839145		-50	-0.0857946	-0.245197	-0.0944465	-0.0872644
-40	-0.113022	-0.233395	-0.10547	-0.0798499		-40	-0.0868402	-0.250716	-0.0760692	-0.0629446		-40	-0.0795433	-0.208535	-0.0867732	-0.0457826		-40	-0.0629708	-0.21295	-0.0596767	-0.0471236		-40	-0.0551512	-0.202518	-0.0620395	-0.0487167
-30	-0.0750838	-0.191227	-0.0698381	-0.0362593		-30	-0.0526979	-0.201138	-0.0437236	-0.0161728		-30	-0.041565	-0.156439	-0.0452857	-0.00292252		-30	-0.0306029	-0.167974	-0.0270609	-0.00801622		-30	-0.0214223	-0.156646	-0.0274402	-0.00711238
-20	-0.0312052	-0.144369	-0.027756	0.0108441		-20	-0.0137186	-0.147576	-0.00644295	0.0337739		-20	0.00214855	-0.103295	-0.00164929	0.0415385		-20	0.00611973	-0.120769	0.00998155	0.0345087		-20	0.0156852	-0.106714	0.0110504	0.0373794
-10	0.0186243	-0.0934704	0.0187957	0.0624537		-10	0.0313373	-0.0904993	0.0375356	0.0903268		-10	0.0500066	-0.044327	0.0452964	0.0914847		-10	0.0484337	-0.0714925	0.0526232	0.0813707		-10	0.05782	-0.0537366	0.0542139	0.0858926
0	0.0756429	-0.039606	0.0721647	0.120376		0	0.0833015	-0.0295225	0.0887461	0.151486		0	0.104674	0.0162932	0.101023	0.145836		0	0.0980119	-0.0188502	0.101775	0.133716		0	0.105712	0.00186089	0.102961	0.139402
10	0.138207	0.0160885	0.131287	0.182633		10	0.140857	0.0334617	0.145571	0.220514		10	0.163985	0.0796695	0.161034	0.205611		10	0.154426	0.0368465	0.158119	0.192453		10	0.160014	0.0606162	0.156776	0.198367
20	0.209018	0.075471	0.197683	0.252029		20	0.20599	0.100315	0.209155	0.296982		20	0.230141	0.145303	0.225093	0.272036		20	0.218331	0.0965682	0.221879	0.258352		20	0.219846	0.122918	0.217613	0.26369
30	0.286117	0.138735	0.270945	0.330105		30	0.278081	0.17266	0.280523	0.384004		30	0.301305	0.217511	0.296029	0.345728		30	0.291349	0.161749	0.294756	0.333417		30	0.287116	0.189795	0.284581	0.33691
40	0.369266	0.207402	0.35304	0.418407		40	0.358532	0.25149	0.360915	0.483748		40	0.382407	0.294554	0.375375	0.428974		40	0.373981	0.23341	0.377648	0.418487		40	0.362759	0.262768	0.359574	0.419555
50	0.462156	0.284736	0.445516	0.518622		50	0.449946	0.339739	0.452554	0.59612		50	0.473676	0.378682	0.462532	0.525034		50	0.468512	0.314357	0.472352	0.515556		50	0.448487	0.346912	0.444218	0.51267
60	0.567194	0.374026	0.551549	0.634618		60	0.555535	0.441676	0.558049	0.724621		60	0.576146	0.473573	0.562452	0.635055		60	0.576611	0.406383	0.581962	0.62608		60	0.548932	0.449605	0.545438	0.621384
70	0.687964	0.479816	0.677146	0.769632		70	0.678353	0.559903	0.68002	0.875712		70	0.692901	0.586351	0.678466	0.765422		70	0.701067	0.509397	0.706953	0.751635		70	0.6686	0.572948	0.668387	0.750968
80	0.832619	0.602259	0.826535	0.927675		80	0.826479	0.699459	0.827312	1.05032		80	0.830582	0.719826	0.825326	0.920627		80	0.84071	0.622304	0.846251	0.891013		80	0.817318	0.716956	0.820318	0.906989
90	1	0.742875	1	1.11265		90	1	0.859135	1	1.25103		90	1	0.871812	1	1.11275		90	1	0.745109	1	1.04513		90	1	0.882773	1	1.08833

## Sheet: panel C+D
CLC-7 WT																CLC-7 F301A															CLC-7 F514A
	170913	170913	170913	170913	170915	171117_part2	171117_part2	180119	180120								170913	170913	170913	170915	170915	170915	170915	170916								170915	171103	171117	171117	171117	171117	170922	170922
	#3	#5	#11	#57	#1	#54	#59	#1	#8								38	31	21	12	17	18	23	21							tau1	35	44	23	29	72	74	1	17		AVRG	STDEV	N
tau1											AVRG	STDEV	N			tau1										AVRG	STDEV	N			10	0.920145	1.09054	1.2134	1.03514	3.52948	1.22107	1.81767	0.80691		1.45429	0.89149	8
10	2.15305	1.80929	1.00378	1.62043	1.1776	1.34518	2.26813	1.5394	1.66227		1.69692	0.37268	8			10	1.82291	0.845534	0.636922	0.360876	0.33627	0.362237	0.604322	0.344862		0.664242	0.463768	8			20	0.988045	1.15824	0.937561	1.13255	1.01925	1.07492	1.07797	0.900371		1.03611	0.0911879	8
20	1.81856	1.78526	1.73944	1.68956	1.32439	1.61131	2.15006	1.12924	1.48829		1.62458	0.315782	8			20	1.16052	0.695729	0.624963	0.370692	0.452427	0.42169	0.5446	0.325004		0.574453	0.258876	8			30	0.968468	0.934389	0.923618	0.892735	0.857324	0.883542	1.4881	0.996077		0.993032	0.205089	8
30	1.69293	2.03339	86.6682	1.75424	1.22434	1.35204	1.57761	0.891133	1.21464		1.46754	0.365276	8			30	1.11693	0.596419	0.605966	0.462584	0.469381	0.455947	0.693298	0.343523		0.593005	0.235144	8			40	0.890251	0.955764	0.73083	0.751518	0.802589	0.734077	0.980017	0.887524		0.841571	0.100097	8
40	2.54049	1.95303	1.66955	1.95908	1.18642	1.24762	1.55987	0.883603	1.17306		1.5629	0.550247	8			40	1.05294	0.658078	0.644459	0.436124	0.503753	0.477592	0.611501	0.348766		0.591652	0.215688	8			50	0.692899	0.972691	0.654213	0.658321	0.71758	0.645793	0.875216	0.854161		0.758859	0.124351	8
50	1.93098	1.86385	2.19657	2.24203	1.11048	1.19342	1.31829	0.663739	1.17299		1.43697	0.523992	8			50	1.02633	0.606212	0.640331	0.471154	0.528212	0.508452	0.58135	0.373387		0.591928	0.194694	8			60	0.633843	0.952335	0.537383	0.58578	0.634123	0.538272	0.932647	0.845368		0.707469	0.174375	8
60	1.67619	1.67622	1.88018	2.29964	0.996056	1.05145	1.23245	0.717551	1.00116		1.33134	0.515716	8			60	1.01395	0.603904	0.647712	0.435611	0.583268	0.533358	0.603077	0.463037		0.61049	0.169334	8			70	0.685387	0.941791	0.539329	0.525196	0.613237	0.483665	0.974945	0.883754		0.705913	0.199448	8
70	1.46993	1.41941	1.56563	1.95671	0.907808	0.901103	1.15742	0.672779	0.953793		1.17987	0.414984	8			70	1.00195	0.647741	0.651872	0.497816	0.632789	0.553157	0.626813	0.602546		0.651836	0.134727	8			80	0.701496	0.866285	0.58253	0.505286	0.667297	0.452874	1.1274	0.859045		0.720277	0.222385	8
80	1.25589	1.24123	1.32235	1.76815	0.803813	0.805763	1.02132	0.627538	0.886699		1.0513	0.362709	8			80	1.15637	0.53255	0.654184	0.61166	0.709484	0.569702	0.71235	0.653974		0.700034	0.172868	8			90	0.780811	0.788479	0.617757	0.491964	0.666882	0.453259	1.07718	0.856065		0.71655	0.203825	8
90	1.19524	1.20712	1.1456	1.50549	0.743857	0.742589	0.91666	0.606848	0.797807		0.964452	0.307222	8			90	1.1077	0.577758	0.641399	0.750262	1.06828	0.612442	0.697639	0.65403		0.763689	0.188364	8
																															tau2
tau2																tau2															10	0.106143	0.127899	0.078515	0.109673	0.103558	0.0763779	0.123722	0.0708737		0.0995951	0.0218817	8
10	0.192734	0.121049	0.0326641	0.135996	0.0995165	0.0885153	0.0873428	0.2159	0.170209		0.138908	0.0491096	8			10	0.239016	0.156966	0.118188	0.0779711	0.0791974	0.0783971	0.139234	0.0793745		0.121043	0.0532148	8			20	0.142819	0.133108	0.0957243	0.15077	0.104134	0.0964775	0.0910925	0.0860324		0.11252	0.0255663	8
20	0.136232	0.143137	0.106468	0.134183	0.109705	0.140448	0.10111	0.17046	0.114848		0.131265	0.0221628	8			20	0.168959	0.0834219	0.120908	0.0636178	0.114269	0.103672	0.112056	0.0698826		0.104598	0.0330314	8			30	0.194095	0.130327	0.145821	0.161888	0.138945	0.137301	0.15389	0.095169		0.14468	0.0282054	8
30	0.135661	0.141985	0.542117	0.128523	0.1152	0.157265	0.135142	0.150843	0.113877		0.134812	0.0154728	8			30	0.15094	0.103766	0.120751	0.0755432	0.109863	0.111858	0.158976	0.0728371		0.113067	0.0321719	8			40	0.200361	0.17048	0.169815	0.173	0.165065	0.164266	0.123388	0.106238		0.159077	0.0299331	8
40	0.201847	0.163969	0.152095	0.138873	0.122325	0.161494	0.170574	0.145472	0.183314		0.160984	0.0253366	8			40	0.143683	0.138981	0.138076	0.0697858	0.114178	0.113498	0.12887	0.074186		0.115157	0.0307704	8			50	0.16535	0.217071	0.168135	0.169277	0.162267	0.167213	0.12332	0.14119		0.164228	0.026863	8
50	0.153056	0.16634	0.219873	0.161172	0.126633	0.165725	0.165979	0.111592	0.154897		0.150674	0.0205125	8			50	0.137177	0.121665	0.1324	0.0638385	0.11348	0.113379	0.116228	0.0767226		0.109361	0.0266212	8			60	0.155767	0.222468	0.145468	0.161024	0.152544	0.143339	0.167851	0.163525		0.163998	0.0251046	8
60	0.14893	0.151991	0.184799	0.189334	0.124027	0.161111	0.162664	0.117617	0.134124		0.148725	0.0232944	8			60	0.139205	0.137413	0.135616	0.0538387	0.117022	0.118122	0.117117	0.0921636		0.113812	0.026941	8			70	0.159804	0.236749	0.149168	0.139823	0.147013	0.130938	0.186069	0.201462		0.168878	0.0362456	8
70	0.150751	0.132252	0.154112	0.170068	0.128826	0.145174	0.152936	0.11099	0.133058		0.140507	0.0180728	8			70	0.135209	0.123634	0.130197	0.0724962	0.116584	0.118	0.11063	0.107223		0.114247	0.0172755	8			80	0.144603	0.187318	0.146761	0.138986	0.153143	0.121325	0.199984	0.192142		0.160533	0.0287168	8
80	0.139569	0.124521	0.134456	0.178203	0.115018	0.134183	0.139989	0.101911	0.123011		0.132051	0.0226495	8			80	0.14084	0.0962335	0.128084	0.0945367	0.112831	0.118856	0.133192	0.110371		0.116868	0.0149865	8			90	0.136665	0.152319	0.138716	0.13152	0.134415	0.120134	0.175284	0.188521		0.147197	0.0234434	8
90	0.146204	0.123505	0.101699	0.160935	0.111977	0.122865	0.128129	0.096596	0.11358		0.125474	0.0202223	8			90	0.13197	0.103647	0.120653	0.0964855	0.122814	0.113969	0.120588	0.108218		0.114793	0.0105397	8
																															norm A0
norm A0																norm A0															10	0.757935	0.752248	0.693132	0.686173	0.691452	0.683156	0.769466	0.743638		0.72215	0.0368128	8
10	0.654753	0.657434	0.688951	0.831096	0.642238	0.658792	0.712581	0.58162	0.629404		0.67099	0.074165	8			10	0.841304	0.900077	0.854399	0.842239	0.864949	0.835885	0.866074	0.837474		0.8553	0.0205064	8			20	0.714316	0.704867	0.661674	0.647371	0.686369	0.653725	0.734086	0.723623		0.690754	0.0334461	8
20	0.625884	0.624727	0.630133	0.771194	0.599242	0.603569	0.651168	0.573343	0.592254		0.630173	0.061769	8			20	0.821486	0.870476	0.827584	0.818201	0.836313	0.807954	0.842192	0.822246		0.830806	0.0173287	8			30	0.692377	0.673309	0.636563	0.628388	0.665315	0.636741	0.699203	0.679526		0.663928	0.0270923	8
30	0.603521	0.597801	0.509012	0.699881	0.572534	0.569735	0.611384	0.567853	0.577317		0.600003	0.0436568	8			30	0.800191	0.85572	0.806562	0.813871	0.814375	0.786067	0.821089	0.813142		0.813877	0.0176971	8			40	0.679635	0.649091	0.623248	0.616134	0.648669	0.624432	0.680154	0.659374		0.647592	0.0249224	8
40	0.575555	0.588152	0.576252	0.637787	0.5574	0.54924	0.578139	0.563819	0.569639		0.577466	0.0272652	8			40	0.784907	0.839202	0.79176	0.806107	0.799733	0.770221	0.806142	0.801439		0.799939	0.0176384	8			50	0.672182	0.632123	0.61516	0.608292	0.639865	0.619295	0.663552	0.642241		0.636589	0.0227267	8
50	0.57146	0.580285	0.557305	0.594046	0.549171	0.539212	0.559628	0.566138	0.562215		0.565269	0.0172042	8			50	0.768912	0.828872	0.779448	0.800422	0.787582	0.758034	0.793542	0.79272		0.788691	0.0189608	8			60	0.666611	0.623271	0.611851	0.604898	0.635786	0.617005	0.652592	0.62806		0.630009	0.0209135	8
60	0.568852	0.578237	0.552418	0.567383	0.546132	0.535347	0.548621	0.565259	0.558642		0.558559	0.0141821	8			60	0.757804	0.818733	0.768738	0.794683	0.777666	0.74841	0.783548	0.778737		0.77854	0.0192524	8			70	0.659554	0.618038	0.607307	0.600864	0.631763	0.615664	0.643907	0.618755		0.624481	0.0195129	8
70	0.569723	0.579996	0.551552	0.554505	0.544624	0.535121	0.542943	0.569284	0.557969		0.556771	0.0154819	8			70	0.747386	0.807864	0.759405	0.79311	0.768594	0.741054	0.771825	0.761689		0.768866	0.0199325	8			80	0.65024	0.610055	0.602286	0.600288	0.62767	0.615132	0.635299	0.611164		0.619017	0.0173314	8
80	0.571789	0.583983	0.555447	0.54645	0.549186	0.537806	0.541993	0.57426	0.55876		0.558028	0.0169258	8			80	0.733482	0.799428	0.750411	0.791885	0.757675	0.736874	0.757022	0.74242		0.75865	0.0226845	8			90	0.643566	0.609831	0.602302	0.60104	0.624251	0.616123	0.631368	0.606856		0.616917	0.015074	8
90	0.576156	0.588113	0.555833	0.54515	0.554108	0.543382	0.545046	0.580505	0.563345		0.561976	0.0177555	8			90	0.727073	0.788958	0.742982	0.784809	0.741334	0.734621	0.744392	0.73124		0.749426	0.0224247	8
																															norm A1
norm A1																norm A1															10	0.153604	0.162001	0.113142	0.222479	0.147541	0.164202	0.163127	0.100931		0.153378	0.0367719	8
10	0.274919	0.288755	0.234903	0.125958	0.19078	0.201436	0.0761647	0.304405	0.282911		0.218166	0.0841167	8			10	0.10004	0.065009	0.101633	0.0768046	0.102856	0.124328	0.0804499	0.09411		0.0931538	0.0163587	8			20	0.192362	0.213379	0.173214	0.25208	0.138855	0.207562	0.200596	0.142373		0.190053	0.0377828	8
20	0.318517	0.321717	0.309675	0.184462	0.275324	0.26795	0.166049	0.315446	0.326245		0.271964	0.0636753	8			20	0.126	0.0851646	0.120529	0.0974396	0.0983	0.12697	0.108943	0.109734		0.109135	0.0131744	8			30	0.189262	0.258414	0.210041	0.26826	0.182246	0.229372	0.23005	0.214562		0.222776	0.0303097	8
30	0.344514	0.348054	0.478303	0.259395	0.322652	0.319729	0.244415	0.323346	0.336738		0.312356	0.0389232	8			30	0.142953	0.101176	0.13419	0.0991538	0.108526	0.135224	0.101764	0.111689		0.116835	0.0157916	8			40	0.185767	0.280777	0.22856	0.274951	0.201453	0.236833	0.250363	0.261383		0.240011	0.0338421	8
40	0.361888	0.368386	0.36274	0.320547	0.35645	0.349981	0.307693	0.305281	0.31175		0.335247	0.0264573	8			40	0.155003	0.0967951	0.138604	0.115546	0.108823	0.140039	0.12369	0.117196		0.124462	0.0170058	8			50	0.201676	0.259188	0.23346	0.274501	0.214293	0.236018	0.2623	0.281554		0.245374	0.0286347	8
50	0.373068	0.362672	0.36162	0.364123	0.358009	0.35298	0.342025	0.313162	0.31846		0.348062	0.0218781	8			50	0.170414	0.110697	0.149521	0.125375	0.111887	0.143983	0.138393	0.121725		0.133999	0.0188089	8			60	0.199787	0.252887	0.245955	0.270468	0.215663	0.248815	0.247252	0.281789		0.245327	0.0266962	8
60	0.372919	0.356344	0.367202	0.390423	0.353532	0.34502	0.351596	0.289306	0.315654		0.346849	0.0316755	8			60	0.176016	0.108654	0.153287	0.133559	0.110401	0.143074	0.14558	0.117102		0.135959	0.0220533	8			70	0.184663	0.239323	0.225338	0.279208	0.20873	0.246726	0.242072	0.268944		0.236875	0.0307103	8
70	0.361592	0.348061	0.367281	0.406487	0.353337	0.337841	0.34364	0.279962	0.306682		0.3422	0.0374613	8			70	0.182798	0.115065	0.158849	0.133119	0.111272	0.142481	0.155139	0.120964		0.139961	0.0232296	8			80	0.192006	0.267406	0.213705	0.271963	0.197983	0.248656	0.222474	0.274438		0.236079	0.0337597	8
80	0.352521	0.329764	0.366144	0.408041	0.329857	0.322839	0.335473	0.273727	0.302655		0.33186	0.0388509	8			80	0.185016	0.1309	0.166142	0.121045	0.119555	0.13705	0.152858	0.13085		0.142927	0.0210623	8			90	0.192888	0.265391	0.19874	0.273481	0.208222	0.235894	0.226551	0.268788		0.233744	0.0325374	8
90	0.327556	0.308504	0.348433	0.402245	0.318106	0.305979	0.31837	0.264047	0.297269		0.31776	0.0392129	8			90	0.1878	0.12965	0.169356	0.120718	0.127367	0.135222	0.161872	0.136409		0.146049	0.0214869	8
																															norm A2
norm A2																norm A2															10	0.0884603	0.0857509	0.193725	0.0913486	0.161006	0.152642	0.0674075	0.155431		0.124471	0.0463411	8
10	0.0703283	0.0538108	0.0761455	0.0429458	0.166983	0.139773	0.211254	0.113975	0.0876854		0.110844	0.0587017	8			10	0.0586556	0.034914	0.0439683	0.0809563	0.0321946	0.0397874	0.0534759	0.0684161		0.051546	0.0166866	8			20	0.0933223	0.0817533	0.165112	0.100548	0.174776	0.138713	0.0653177	0.134004		0.119193	0.0398562	8
20	0.0555987	0.0535559	0.0601914	0.0443437	0.125433	0.128481	0.182783	0.111211	0.0815008		0.0978634	0.0477622	8			20	0.0525134	0.0443595	0.051887	0.0843599	0.0653872	0.065076	0.0488654	0.0680198		0.0600585	0.0120387	8			30	0.118361	0.0682774	0.153395	0.103352	0.152439	0.133886	0.0707473	0.105912		0.113296	0.0329073	8
30	0.051965	0.0541442	0.0126854	0.0407244	0.104814	0.110536	0.144202	0.108801	0.0859456		0.0876414	0.0359857	8			30	0.0568554	0.0431042	0.0592481	0.0869754	0.077099	0.0787087	0.0771464	0.0751693		0.0692883	0.0131455	8			40	0.134598	0.0701317	0.148193	0.108915	0.149879	0.138735	0.0694835	0.0792431		0.112397	0.0350755	8
40	0.0625566	0.0434619	0.061008	0.0416667	0.0861504	0.10078	0.114167	0.130899	0.118611		0.0872866	0.0346463	8			40	0.0600903	0.0640034	0.0696353	0.078347	0.091444	0.0897407	0.0701675	0.0813647		0.0755991	0.010462	8			50	0.126142	0.108688	0.15138	0.117207	0.145841	0.144687	0.0741477	0.0762049		0.118037	0.0302963	8
50	0.0554723	0.0570426	0.0810756	0.0418318	0.0928198	0.107808	0.0983473	0.1207	0.119325		0.0866683	0.0309537	8			50	0.0606746	0.0604309	0.071031	0.074203	0.100531	0.0979827	0.0680649	0.0855552		0.0773092	0.0142966	8			60	0.133602	0.123842	0.142194	0.124633	0.148551	0.13418	0.100156	0.0901513		0.124664	0.0201452	8
60	0.0582285	0.0654193	0.0803797	0.0421948	0.100336	0.119633	0.0997831	0.145435	0.125704		0.0945917	0.0361718	8			60	0.0661802	0.0726132	0.0779751	0.0717581	0.111933	0.108515	0.0708716	0.104162		0.085501	0.0186565	8			70	0.155783	0.142639	0.167355	0.119928	0.159507	0.13761	0.114021	0.112301		0.138643	0.0214507	8
70	0.068685	0.0719423	0.0811667	0.0390078	0.10204	0.127038	0.113417	0.150754	0.13535		0.101029	0.0382104	8			70	0.0698159	0.077071	0.0817455	0.0737712	0.120134	0.116465	0.0730362	0.117347		0.0911733	0.0226943	8			80	0.157754	0.12254	0.18401	0.127749	0.174348	0.136211	0.142226	0.114398		0.144904	0.0249831	8
80	0.0756895	0.0862522	0.0784097	0.0455085	0.120958	0.139356	0.122534	0.152013	0.138585		0.110112	0.0370741	8			80	0.0815017	0.0696726	0.0834464	0.0870707	0.12277	0.126076	0.0901198	0.12673		0.0984234	0.023513	8			90	0.163546	0.124778	0.198958	0.12548	0.167527	0.147983	0.142081	0.124356		0.149339	0.0263109	8
90	0.0962883	0.103383	0.0957336	0.0526054	0.127786	0.150639	0.136584	0.155448	0.139387		0.120265	0.0344065	8			90	0.0851264	0.0813921	0.087662	0.0944731	0.131299	0.130157	0.0937354	0.132351		0.104525	0.0230947	8
