# Supplementary material for: Divergent Cl- and H+ pathways underlie transport coupling and gating in CLC exchangers and channels
Source: eLife. 2020 Apr 28;9:e51224. doi: 10.7554/eLife.51224 (PMC7274781; doi:10.7554/eLife.51224)
Supplement: Figure 5—figure supplement 2—source data 1. [file elife-51224-fig5-figsupp2-data1.xlsx]

## Sheet: panel D
CLC-5 WT
	170330					170407	170714					170715			170727					170728				170915			average	stdev	n	sem
	10	11	12	18	19	9	2	3	4	5	6	1	2	3	1	4	5	42	43	1	2	3	4	2	3
-80	0.0159946	0.00395053	0.00399587	0.00443635	0.00973214	-0.00952061	0.00044074	0.00201808	0.000976801	-0.000201204	0.00038767	-0.0103469	-0.00514607	-0.0117391	-0.00194313	-0.0375211	-0.0051585	-0.00484818	0.00344787	-0.000106704	-0.000483322	-0.000444805	0.0013517	-0.000782779	-0.0602685		-0.00407114	0.0150881	25	0.00307985
-60	0.0269609	0.00971266	0.0135902	0.0253012	0.0184055	-0.00281148	0.00490825	0.00979892	0.00762835	0.00616768	0.00746264	0.000553778	0.000842245	-0.00308925	0.00412796	-0.0234985	0.00585224	0.00291589	0.0148754	0.00221271	0.00224911	0.0045548	0.00448643	0.00382216	-0.0341178		0.00451648	0.0126295	25	0.00257798
-40	0.0400896	0.0150148	0.0226701	0.0467053	0.0263724	0.0050718	0.0106479	0.0156345	0.0136578	0.0139837	0.0140659	0.00675464	0.00648661	0.00354421	0.0122346	-0.0074154	0.0211666	0.0128681	0.0281271	0.00495672	0.00589183	0.0110339	0.00773279	0.0121025	-0.00538585		0.0137605	0.0122119	25	0.00249274
-20	0.0558182	0.0216602	0.0336098	0.0726987	0.0379613	0.0140764	0.0167932	0.0227371	0.0205303	0.0224884	0.0210957	0.0177501	0.0131143	0.0126154	0.0209174	0.0111197	0.0365724	0.0235725	0.0410865	0.0085574	0.00978565	0.0166831	0.0123625	0.0200709	0.0236078		0.0242914	0.01501	25	0.0030639
0	0.0784287	0.0305376	0.0473862	0.107547	0.055882	0.0267134	0.0281823	0.0350642	0.0318391	0.0356286	0.0340568	0.0337659	0.0240635	0.0265113	0.0364878	0.0341778	0.0569775	0.0400927	0.0633906	0.0200401	0.0194819	0.0273066	0.0265424	0.0469973	0.0594836		0.0410634	0.0202233	25	0.00412806
20	0.115172	0.0518591	0.0740963	0.157097	0.0920437	0.0524726	0.0640426	0.0657727	0.0595209	0.06259	0.0629898	0.0640416	0.0610032	0.0555727	0.0728261	0.0765588	0.0893172	0.0781927	0.0922918	0.0706416	0.0594341	0.0570081	0.0842475	0.115888	0.106907		0.0776635	0.024857	25	0.00507391
40	0.20987	0.136482	0.156181	0.265943	0.18888	0.136415	0.188652	0.176089	0.154503	0.159501	0.163952	0.168392	0.189479	0.150828	0.194812	0.191137	0.186842	0.201638	0.181372	0.237085	0.203711	0.166251	0.260242	0.216383	0.217559		0.188088	0.0339237	25	0.00692466
60	0.473507	0.413084	0.404328	0.520555	0.460664	0.404609	0.499589	0.476021	0.439962	0.441991	0.452184	0.444502	0.49912	0.437415	0.497037	0.483927	0.455527	0.502546	0.446412	0.569337	0.532307	0.463606	0.587875	0.478357	0.509144		0.475744	0.0461754	25	0.00942551
80	1	1	1	1	1	1	1	1	1	1	1	1	1	1	1	1	1	1	1	1	1	1	1	1	1		1	0	25	0
CLC-5 F255A
	170728		170915				170916	170923																			average	stdev	n	sem
	1	3	12	13	55	54	14(170916)	3	4	5
-80	-0.0100377	-0.0239038	-0.110363	-0.095021	-0.221384	-0.304079	-0.315612	-0.337648	-0.179611	-0.122131																	-0.171979	0.119434	10	0.0398115
-60	0.0176058	0.00883629	-0.0503403	-0.0309024	-0.138785	-0.205267	-0.208235	-0.248583	-0.126752	-0.0742354																	-0.105666	0.0944885	10	0.0314962
-40	0.0517326	0.0468254	0.0178593	0.0330211	-0.055605	-0.1048	-0.106016	-0.153052	-0.0666962	-0.0248501																	-0.0361581	0.0722721	10	0.0240907
-20	0.093839	0.0915491	0.0868269	0.109991	0.0290295	0.00644561	0.00197873	-0.0398356	0.00859055	0.0320089																	0.0420424	0.0502458	10	0.0167486
0	0.167403	0.166861	0.23458	0.237964	0.149219	0.141394	0.13055	0.0995659	0.117492	0.123194																	0.156822	0.0468865	10	0.0156288
20	0.288612	0.288461	0.447913	0.440844	0.335993	0.317474	0.295391	0.271907	0.269349	0.2574																	0.321334	0.0687927	10	0.0229309
40	0.459325	0.461861	0.607969	0.606061	0.525076	0.502427	0.489134	0.47243	0.468514	0.448936																	0.504173	0.0586447	10	0.0195482
60	0.686674	0.686502	0.79126	0.778386	0.744824	0.714187	0.720085	0.725407	0.708309	0.685116																	0.724075	0.0373965	10	0.0124655
80	1	1	1	1	1	1	1	1	1	1																	1	0	10	0
CLC-5 F445A
	170330					170407				170714				170715					170915			170916					average	stdev	n	sem
	13	14	15	16	17	1	16	23	29	7	8	9	11	4	5	6	7	8	5	6	7	16
-80	0.00181887	-0.0137381	0.00463098	-0.000284787	0.00809871	-0.0255768	-0.0259487	-0.0150519	-0.0239438	-0.00201098	-0.00517223	-0.0379873	-0.0315795	-0.0217256	-0.0483184	-0.0151213	-0.0560366	-0.0190517	-0.0998105	-0.0448519	-0.242549	-0.121867					-0.0380035	0.055762	22	0.0121683
-60	0.0159341	7.81066e-05	0.0260363	0.0206168	0.0344623	-0.0131927	-0.0148258	-0.00481986	-0.0129184	0.0125333	0.00573397	-0.0174569	-0.0169292	-0.00885207	-0.0245377	-0.0064507	-0.0371838	-0.00670947	-0.0588629	-0.0232349	-0.158892	-0.0807335					-0.0168275	0.0411728	22	0.00898464
-40	0.0292909	0.013874	0.0453583	0.0421485	0.0591307	0.000499753	-0.00406459	0.00596658	-0.00165488	0.0275232	0.0224377	0.00591615	-0.0013285	0.00374344	-0.00110653	0.00506094	-0.0140811	0.00651008	-0.0172836	0.0113703	-0.0782104	-0.0427656					0.00537888	0.0290749	22	0.00634467
-20	0.0467303	0.0301839	0.0736314	0.0684701	0.0922096	0.018503	0.010589	0.0212992	0.0132066	0.0455568	0.0423847	0.0353268	0.0179007	0.0234923	0.0231788	0.0232139	0.0110827	0.0260702	0.0372836	0.0477282	0.00286801	0.0125058					0.0328825	0.0225784	22	0.00492701
0	0.0822316	0.0660536	0.117582	0.118593	0.141033	0.0580241	0.04444	0.0594089	0.0481888	0.0819501	0.0850662	0.0862276	0.0558759	0.0696182	0.0707207	0.0652634	0.0598179	0.0696668	0.113493	0.163154	0.118012	0.084618					0.0845017	0.0313519	22	0.00684155
20	0.171441	0.147948	0.215469	0.218871	0.237594	0.160605	0.139781	0.164709	0.147618	0.173781	0.191192	0.186316	0.149685	0.179451	0.174802	0.179611	0.166645	0.178873	0.267858	0.402514	0.28465	0.260941					0.200016	0.0608327	22	0.0132748
40	0.360456	0.299915	0.399457	0.407479	0.41563	0.371754	0.343636	0.375049	0.354998	0.366313	0.390493	0.37652	0.344807	0.393667	0.373104	0.39428	0.372003	0.388511	0.556778	0.569503	0.473828	0.441063					0.398602	0.0637864	22	0.0139193
60	0.64555	0.549727	0.661367	0.670253	0.670377	0.670429	0.643756	0.666415	0.653416	0.64959	0.665628	0.653802	0.639509	0.675655	0.663606	0.679168	0.663258	0.67332	0.756892	0.757224	0.715854	0.679501					0.668377	0.04097	22	0.00894038
80	1	1	1	1	1	1	1	1	1	1	1	1	1	1	1	1	1	1	1	1	1	1					1	0	22	0
