# Supplementary material for: Divergent Cl- and H+ pathways underlie transport coupling and gating in CLC exchangers and channels
Source: eLife. 2020 Apr 28;9:e51224. doi: 10.7554/eLife.51224 (PMC7274781; doi:10.7554/eLife.51224)
Supplement: Figure 5—source data 1. [file elife-51224-fig5-data1.xlsx]

## Sheet: panel D
CLC-7 WT
	170913					170915	171117_part2		180119	180120
	3	5	11	47	57	1	54	59	1	8
-80	-1.61087e-07	-5.48088e-08	-7.34841e-08	-1.18979e-07	-1.46674e-07	-1.04799e-07	-7.34076e-08	-4.66059e-08	-1.46646e-07	-2.1001e-07
-70	-1.33088e-07	-4.54291e-08	-6.0014e-08	-1.12561e-07	-1.22276e-07	-7.78498e-08	-4.89384e-08	-3.11902e-08	-1.15113e-07	-1.68702e-07
-60	-1.08801e-07	-3.56996e-08	-4.71129e-08	-9.87407e-08	-1.02579e-07	-5.14832e-08	-2.82969e-08	-8.14145e-09	-8.55269e-08	-1.42774e-07
-50	-8.13666e-08	-2.51679e-08	-3.26166e-08	-7.55177e-08	-8.21455e-08	-2.43517e-08	-1.77931e-09	1.31056e-08	-6.53957e-08	-1.0625e-07
-40	-5.14366e-08	-1.3195e-08	-1.77659e-08	-4.86521e-08	-5.69729e-08	3.88526e-09	2.31983e-08	3.27153e-08	-3.60655e-08	-8.59268e-08
-30	-1.58396e-08	-3.26493e-11	-1.47388e-09	-1.38386e-08	-2.86987e-08	3.62826e-08	4.93571e-08	5.96591e-08	-2.02645e-10	-5.81218e-08
-20	2.73228e-08	1.4459e-08	1.53591e-08	1.31576e-08	5.65299e-09	7.59701e-08	8.29545e-08	8.63412e-08	9.38033e-08	-1.5481e-08
-10	8.51586e-08	3.15998e-08	3.69076e-08	3.37826e-08	4.53965e-08	1.33955e-07	1.19946e-07	1.17741e-07	2.64825e-07	3.02634e-08
0	1.684e-07	5.72295e-08	6.54384e-08	5.47295e-08	9.26353e-08	2.26656e-07	1.93436e-07	1.60691e-07	5.75176e-07	1.05978e-07
10	2.88512e-07	9.48507e-08	1.09939e-07	7.84888e-08	1.49473e-07	3.7569e-07	3.06803e-07	2.16059e-07	1.09717e-06	2.31277e-07
20	4.64562e-07	1.52645e-07	1.81497e-07	1.10065e-07	2.21017e-07	6.207e-07	5.28417e-07	3.11648e-07	1.85407e-06	4.31533e-07
30	7.12766e-07	2.46623e-07	2.93801e-07	1.53657e-07	3.25597e-07	1.02694e-06	9.29598e-07	4.67165e-07	2.83695e-06	7.53893e-07
40	1.04905e-06	3.75471e-07	4.59757e-07	2.19049e-07	4.8195e-07	1.59626e-06	1.5966e-06	7.26936e-07	3.98052e-06	1.22255e-06
50	1.48673e-06	5.73731e-07	6.89375e-07	3.24258e-07	7.22136e-07	2.36352e-06	2.57579e-06	1.14108e-06	5.14587e-06	1.8208e-06
60	2.03431e-06	8.37411e-07	9.88237e-07	4.94543e-07	1.07601e-06	3.27866e-06	3.78787e-06	1.70886e-06	6.36175e-06	2.55017e-06
70	2.71359e-06	1.17521e-06	1.37575e-06	7.96418e-07	1.57904e-06	4.27516e-06	5.16226e-06	2.47398e-06	7.59603e-06	3.39684e-06
80	3.47724e-06	1.61312e-06	1.85145e-06	1.27854e-06	2.25709e-06	5.40064e-06	6.59973e-06	3.44464e-06	8.81806e-06	4.3239e-06
90	4.3319e-06	2.14373e-06	2.43273e-06	1.99566e-06	3.12587e-06	6.53017e-06	8.05665e-06	4.53971e-06	1.00628e-05	5.28096e-06
CLC-7 F301A
	170913			170915					170916	171117		180126
	38	31	21	12	14	17	18	23	21	43	49	32	35	37	39	41	42	43
-80	-8.05711e-07	-2.45446e-07	-4.68447e-07	-2.54156e-07	-3.26227e-07	-2.14221e-06	-1.51414e-06	-4.99184e-07	-2.9798e-07	-2.45712e-07	-2.68265e-07	-4.65675e-07	-2.7387e-07	-9.76126e-07	-5.73812e-07	-4.61981e-07	-1.7857e-07	-3.68991e-07
-70	-6.82434e-07	-2.08703e-07	-3.92435e-07	-1.95816e-07	-2.64897e-07	-1.73821e-06	-1.21298e-06	-4.02281e-07	-2.31194e-07	-1.92822e-07	-2.19433e-07	-3.80539e-07	-2.171e-07	-7.74414e-07	-4.50179e-07	-3.61956e-07	-1.40081e-07	-2.91868e-07
-60	-5.77714e-07	-1.72211e-07	-3.2813e-07	-1.49753e-07	-2.06026e-07	-1.4037e-06	-9.62472e-07	-3.18526e-07	-1.63937e-07	-1.48342e-07	-1.73256e-07	-3.02739e-07	-1.68762e-07	-6.11523e-07	-3.48325e-07	-2.8548e-07	-1.08656e-07	-2.33108e-07
-50	-4.74141e-07	-1.34796e-07	-2.63078e-07	-1.02691e-07	-1.49207e-07	-1.09207e-06	-7.3194e-07	-2.37948e-07	-9.46875e-08	-1.06954e-07	-1.29613e-07	-2.2916e-07	-1.2372e-07	-4.51022e-07	-2.64503e-07	-2.12076e-07	-7.84948e-08	-1.71588e-07
-40	-3.6298e-07	-9.15796e-08	-1.91292e-07	-5.37733e-08	-8.72062e-08	-7.82659e-07	-4.97099e-07	-1.52463e-07	-1.76912e-08	-6.26013e-08	-8.35431e-08	-1.52369e-07	-7.38364e-08	-2.88979e-07	-1.6705e-07	-1.34533e-07	-3.98728e-08	-1.04305e-07
-30	-2.39868e-07	-4.79629e-08	-1.10396e-07	4.19776e-11	-2.11381e-08	-4.58797e-07	-2.41926e-07	-6.03545e-08	6.8666e-08	-1.41958e-08	-2.94209e-08	-7.00299e-08	-2.40941e-08	-1.08565e-07	-5.66697e-08	-5.68235e-08	-2.13597e-09	-3.03358e-08
-20	-9.97227e-08	2.36241e-09	-1.55784e-08	5.9986e-08	4.87593e-08	-1.02523e-07	4.87127e-08	4.28685e-08	1.69165e-07	4.27634e-08	3.50256e-08	1.43617e-08	3.49526e-08	9.63971e-08	7.44972e-08	3.47906e-08	4.06499e-08	5.23521e-08
-10	5.98283e-08	5.76099e-08	9.54431e-08	1.30378e-07	1.26245e-07	2.94375e-07	3.83125e-07	1.59417e-07	2.85191e-07	1.09135e-07	1.03248e-07	1.1112e-07	1.02668e-07	3.30253e-07	2.18808e-07	1.40475e-07	8.71218e-08	1.51384e-07
0	2.42347e-07	1.20718e-07	2.23647e-07	2.12607e-07	2.17383e-07	7.44655e-07	7.73927e-07	2.92957e-07	4.17556e-07	1.86305e-07	1.88087e-07	2.22448e-07	1.79509e-07	6.02169e-07	3.87995e-07	2.57089e-07	1.44943e-07	2.749e-07
10	4.42593e-07	1.89286e-07	3.66469e-07	3.03312e-07	3.09207e-07	1.25024e-06	1.22019e-06	4.42971e-07	5.68092e-07	2.75315e-07	2.81266e-07	3.44066e-07	2.66942e-07	9.1363e-07	5.66298e-07	3.91494e-07	2.0266e-07	4.0111e-07
20	6.68611e-07	2.6555e-07	5.27486e-07	4.04585e-07	4.11688e-07	1.81554e-06	1.72466e-06	6.09104e-07	7.40648e-07	3.75016e-07	3.89052e-07	4.84313e-07	3.60792e-07	1.26694e-06	7.95292e-07	5.45799e-07	2.68787e-07	5.2987e-07
30	9.16884e-07	3.48789e-07	7.0736e-07	5.1882e-07	5.22463e-07	2.45142e-06	2.30222e-06	7.9653e-07	9.41744e-07	4.88508e-07	5.02202e-07	6.33477e-07	4.72374e-07	1.67634e-06	1.0366e-06	7.18929e-07	3.39669e-07	6.87961e-07
40	1.18194e-06	4.42859e-07	9.09748e-07	6.47094e-07	6.4673e-07	3.16375e-06	2.95506e-06	1.00585e-06	1.17289e-06	6.19763e-07	6.36343e-07	8.06088e-07	5.97e-07	2.14738e-06	1.33118e-06	9.20628e-07	4.23088e-07	8.62724e-07
50	1.48082e-06	5.47627e-07	1.14083e-06	7.9236e-07	7.8667e-07	3.97247e-06	3.70034e-06	1.24287e-06	1.4535e-06	7.73075e-07	7.90764e-07	1.00473e-06	7.40164e-07	2.69961e-06	1.67435e-06	1.1518e-06	5.1986e-07	1.07346e-06
60	1.81718e-06	6.6658e-07	1.40478e-06	9.60415e-07	9.54818e-07	4.91399e-06	4.55578e-06	1.52156e-06	1.80636e-06	9.52352e-07	9.67593e-07	1.2332e-06	9.10647e-07	3.35096e-06	2.08473e-06	1.42556e-06	6.33959e-07	1.32441e-06
70	2.2036e-06	8.02448e-07	1.71282e-06	1.16154e-06	1.17069e-06	6.01029e-06	5.5419e-06	1.85312e-06	2.26808e-06	1.16645e-06	1.18176e-06	1.505e-06	1.12226e-06	4.16281e-06	2.57611e-06	1.75789e-06	7.79953e-07	1.63433e-06
80	2.66532e-06	9.61449e-07	2.08352e-06	1.41278e-06	1.45583e-06	7.345e-06	6.64378e-06	2.2665e-06	2.85281e-06	1.43837e-06	1.4564e-06	1.825e-06	1.41159e-06	5.12517e-06	3.18103e-06	2.18492e-06	9.70907e-07	2.02683e-06
90	3.20231e-06	1.1574e-06	2.52085e-06	1.72333e-06	1.85935e-06	9.05832e-06	7.90586e-06	2.7723e-06	3.55285e-06	1.77163e-06	1.79327e-06	2.20461e-06	1.78008e-06	6.34806e-06	3.88703e-06	2.71749e-06	1.21457e-06	2.50584e-06
CLC-7 F514A
	170915		170922			171103		171117
	5	35	1	12	17	32	44	18	23	29	72	74
-80	-1.99641e-07	-1.70079e-07	-1.31166e-07	-1.62603e-07	-5.1236e-08	-9.12116e-08	-4.81869e-08	-2.8334e-07	-6.5705e-08	-1.09967e-07	-6.98432e-08	-8.84439e-08
-70	-1.40112e-07	-1.33186e-07	-1.02729e-07	-1.31077e-07	-3.43937e-08	-6.48571e-08	-3.20179e-08	-2.30578e-07	-4.68057e-08	-8.01355e-08	-4.90454e-08	-6.5273e-08
-60	-1.05028e-07	-9.96735e-08	-8.26119e-08	-1.04795e-07	-2.27799e-08	-3.75853e-08	-1.69689e-08	-1.77e-07	-2.8573e-08	-5.96843e-08	-3.10847e-08	-4.53445e-08
-50	-6.89272e-08	-6.51119e-08	-5.98647e-08	-7.60728e-08	-8.15765e-09	-1.94326e-08	-5.11945e-09	-1.33863e-07	-1.09535e-08	-3.63588e-08	-1.39558e-08	-2.42907e-08
-40	-3.1875e-08	-2.84468e-08	-3.9445e-08	-4.86007e-08	3.91325e-09	-5.58874e-09	1.11561e-08	-8.95638e-08	1.08682e-08	-1.36145e-08	6.56463e-09	-1.83447e-09
-30	8.16231e-09	1.04384e-08	-1.33582e-08	-1.81716e-08	2.21269e-08	2.64825e-08	3.02154e-08	-3.09247e-08	3.34524e-08	1.11295e-08	2.88609e-08	2.1763e-08
-20	5.87127e-08	5.56343e-08	1.39086e-08	1.45942e-08	4.01026e-08	5.25704e-08	4.49125e-08	2.86903e-08	6.25747e-08	4.383e-08	5.65433e-08	5.21704e-08
-10	1.17243e-07	1.11842e-07	4.72435e-08	5.29664e-08	6.27006e-08	8.59642e-08	7.01578e-08	1.06821e-07	9.93067e-08	8.89505e-08	9.26141e-08	9.68537e-08
0	2.06665e-07	1.85378e-07	8.56157e-08	9.47248e-08	8.70382e-08	1.32413e-07	9.92214e-08	2.12436e-07	1.54997e-07	1.56213e-07	1.43505e-07	1.62628e-07
10	3.44897e-07	2.87281e-07	1.44445e-07	1.46143e-07	1.20494e-07	2.00885e-07	1.43057e-07	3.4743e-07	2.35436e-07	2.60431e-07	2.13823e-07	2.62244e-07
20	5.30261e-07	4.24646e-07	2.20299e-07	2.09254e-07	1.73372e-07	3.02378e-07	2.05717e-07	5.35447e-07	3.53536e-07	4.20371e-07	3.10378e-07	4.16206e-07
30	7.78722e-07	6.00779e-07	3.33368e-07	2.81642e-07	2.45821e-07	4.61636e-07	3.02208e-07	7.83527e-07	5.26483e-07	6.46272e-07	4.47947e-07	6.29608e-07
40	1.08546e-06	8.1479e-07	4.78153e-07	3.75849e-07	3.54911e-07	6.65006e-07	4.43537e-07	1.11142e-06	7.49413e-07	9.44667e-07	6.2516e-07	9.06837e-07
50	1.45527e-06	1.06278e-06	6.66236e-07	4.93624e-07	4.92551e-07	9.24605e-07	6.15284e-07	1.50902e-06	1.01261e-06	1.30321e-06	8.34962e-07	1.23628e-06
60	1.88351e-06	1.34762e-06	8.8951e-07	6.41623e-07	6.58228e-07	1.22518e-06	8.21032e-07	1.98162e-06	1.29699e-06	1.70137e-06	1.06852e-06	1.59708e-06
70	2.36954e-06	1.69725e-06	1.15717e-06	8.22943e-07	8.57752e-07	1.56474e-06	1.06012e-06	2.53707e-06	1.64166e-06	2.14612e-06	1.33995e-06	1.97701e-06
80	2.93062e-06	2.14935e-06	1.4955e-06	1.06202e-06	1.10866e-06	1.98064e-06	1.38687e-06	3.18791e-06	2.08555e-06	2.62619e-06	1.67858e-06	2.39499e-06
90	3.55351e-06	2.72261e-06	1.90899e-06	1.36721e-06	1.41393e-06	2.44867e-06	1.82347e-06	3.90637e-06	2.61493e-06	3.13068e-06	2.11625e-06	2.85651e-06

## Sheet: panel E
CLC-7 WT
	170913					170915	171117_part2		180119	180120
	3	5	11	47	57	1	54	59	1	8
-80	-0.0371861	-0.0255671	-0.0302065	-0.0596187	-0.0469227	-0.0160485	-0.00911143	-0.0102663	-0.014573	-0.0397673
-70	-0.0307227	-0.0211916	-0.0246694	-0.0564028	-0.0391174	-0.0119216	-0.00607428	-0.00687052	-0.0114394	-0.0319453
-60	-0.0251163	-0.0166531	-0.0193663	-0.0494778	-0.0328162	-0.0078839	-0.00351225	-0.00179338	-0.00849928	-0.0270356
-50	-0.0187831	-0.0117403	-0.0134074	-0.037841	-0.0262792	-0.0037291	-0.000220849	0.00288687	-0.00649873	-0.0201194
-40	-0.0118739	-0.00615515	-0.00730285	-0.024379	-0.0182263	0.000594971	0.00287939	0.00720647	-0.00358403	-0.0162711
-30	-0.00365649	-1.52301e-05	-0.000605855	-0.00693437	-0.00918102	0.00555616	0.00612625	0.0131416	-2.0138e-05	-0.0110059
-20	0.00630733	0.00674478	0.00631355	0.00659314	0.00180845	0.0116337	0.0102964	0.0190191	0.00932175	-0.00293148
-10	0.0196585	0.0147406	0.0151713	0.0169281	0.0145228	0.0205133	0.0148878	0.0259357	0.0263171	0.00573067
0	0.0388744	0.0266963	0.0268992	0.0274243	0.029635	0.034709	0.0240095	0.0353967	0.0571584	0.0200679
10	0.0666017	0.0442457	0.0451918	0.0393298	0.047818	0.0575315	0.0380807	0.047593	0.109032	0.0437944
20	0.107242	0.0712052	0.0746064	0.0551524	0.0707056	0.0950511	0.0655876	0.0686492	0.18425	0.0817148
30	0.164539	0.115044	0.12077	0.0769955	0.104162	0.157261	0.115383	0.102906	0.281923	0.142757
40	0.242169	0.175149	0.188988	0.109763	0.154181	0.244444	0.198171	0.160128	0.395566	0.231502
50	0.343204	0.267633	0.283375	0.162482	0.231019	0.361938	0.319709	0.251355	0.511373	0.344786
60	0.469611	0.390633	0.406226	0.247809	0.344226	0.502078	0.470154	0.376425	0.632202	0.482898
70	0.626419	0.548207	0.565516	0.399075	0.505153	0.654678	0.640745	0.544963	0.754859	0.643223
80	0.802705	0.752486	0.761057	0.640659	0.722067	0.827029	0.819165	0.758779	0.876299	0.818771
90	1	1	1	1	1	1	1	1	1	1
CLC-7 F301A
	170913			170915					170916	171117		180126
	38	31	21	12	14	17	18	23	21	43	49	32	35	37	39	41	42	43
-80	-0.251603	-0.212067	-0.185829	-0.14748	-0.175452	-0.236491	-0.191521	-0.180061	-0.0838709	-0.138693	-0.149595	-0.211228	-0.153853	-0.153768	-0.147622	-0.170003	-0.147024	-0.147252
-70	-0.213107	-0.180321	-0.155676	-0.113627	-0.142468	-0.191891	-0.153427	-0.145107	-0.0650729	-0.108839	-0.122364	-0.172611	-0.121961	-0.121992	-0.115816	-0.133195	-0.115334	-0.116475
-60	-0.180406	-0.148792	-0.130166	-0.0868976	-0.110805	-0.154963	-0.121742	-0.114896	-0.0461423	-0.0837317	-0.0966147	-0.137321	-0.0948062	-0.0963324	-0.0896122	-0.105053	-0.0894609	-0.0930256
-50	-0.148062	-0.116465	-0.104361	-0.059589	-0.0802468	-0.12056	-0.092582	-0.0858305	-0.0266512	-0.0603704	-0.0722774	-0.103946	-0.0695026	-0.0710489	-0.0680476	-0.0780413	-0.0646279	-0.0684753
-40	-0.113349	-0.0791255	-0.075884	-0.0312032	-0.0469014	-0.0864022	-0.0628773	-0.054995	-0.00497945	-0.0353354	-0.046587	-0.0691137	-0.0414793	-0.0455225	-0.0429763	-0.0495064	-0.0328289	-0.0416248
-30	-0.0749046	-0.0414403	-0.0437934	2.43585e-05	-0.0113685	-0.0506492	-0.0306009	-0.0217705	0.0193271	-0.00801286	-0.0164063	-0.0317652	-0.0135354	-0.017102	-0.0145792	-0.0209103	-0.00175863	-0.012106
-20	-0.0311409	0.00204115	-0.00617981	0.0348083	0.0262238	-0.0113181	0.00616159	0.0154631	0.047614	0.0241379	0.0195317	0.0065144	0.0196354	0.0151853	0.0191656	0.0128025	0.0334687	0.020892
-10	0.0186829	0.0497754	0.0378615	0.0756548	0.0678975	0.0324977	0.0484609	0.0575035	0.0802712	0.0616015	0.0575751	0.0504037	0.0576761	0.0520242	0.0562919	0.0516931	0.0717309	0.0604123
0	0.075679	0.104301	0.0887191	0.12337	0.116914	0.0822067	0.0978929	0.105673	0.117527	0.10516	0.104885	0.100902	0.100843	0.0948589	0.0998177	0.0946056	0.119337	0.109704
10	0.138211	0.163545	0.145375	0.176004	0.166298	0.138021	0.15434	0.159785	0.159898	0.155402	0.156845	0.156067	0.149961	0.143923	0.145689	0.144065	0.166858	0.16007
20	0.20879	0.229438	0.209249	0.23477	0.221415	0.200427	0.21815	0.219711	0.208466	0.211679	0.216951	0.219682	0.202683	0.199579	0.204601	0.200847	0.221303	0.211454
30	0.286319	0.301357	0.280604	0.301057	0.280992	0.270627	0.291204	0.287317	0.265068	0.275739	0.280048	0.287342	0.265367	0.264072	0.266681	0.264556	0.279663	0.274543
40	0.369089	0.382634	0.36089	0.375492	0.347826	0.349264	0.373781	0.362823	0.330127	0.349827	0.35485	0.365638	0.335378	0.338274	0.342467	0.338779	0.348346	0.344285
50	0.462422	0.473154	0.452558	0.459785	0.423088	0.438544	0.46805	0.448318	0.40911	0.436364	0.440962	0.45574	0.415804	0.425265	0.430753	0.423847	0.428021	0.428384
60	0.567458	0.57593	0.557263	0.557303	0.513522	0.542483	0.576254	0.548845	0.508426	0.537557	0.539569	0.559373	0.511577	0.527872	0.53633	0.524586	0.521964	0.528527
70	0.688128	0.693321	0.679462	0.674013	0.629625	0.663511	0.700987	0.668442	0.638384	0.658403	0.658995	0.682662	0.630454	0.655762	0.662746	0.64688	0.642167	0.652207
80	0.832311	0.8307	0.826516	0.819799	0.782977	0.810857	0.840362	0.817551	0.802966	0.811893	0.81215	0.827809	0.792991	0.807361	0.818371	0.804022	0.799386	0.808841
90	1	1	1	1	1	1	1	1	1	1	1	1	1	1	1	1	1	1
CLC-7 F514A
	170915		170922			171103		171117
	5	35	1	12	17	32	44	18	23	29	72	74
-80	-0.0561814	-0.0624692	-0.0687097	-0.118931	-0.0362365	-0.0372495	-0.0264258	-0.0725329	-0.0251268	-0.0351255	-0.0330032	-0.0309623
-70	-0.0394292	-0.0489183	-0.0538131	-0.0958725	-0.0243248	-0.0264867	-0.0175587	-0.0590261	-0.0178994	-0.0255968	-0.0231756	-0.0228507
-60	-0.0295561	-0.0366095	-0.0432753	-0.0766488	-0.016111	-0.0153493	-0.00930578	-0.0453105	-0.0109268	-0.0190643	-0.0146885	-0.0158741
-50	-0.019397	-0.0239152	-0.0313594	-0.055641	-0.00576948	-0.00793599	-0.00280753	-0.0342679	-0.00418883	-0.0116137	-0.0065946	-0.00850366
-40	-0.00897001	-0.0104484	-0.0206628	-0.0355475	0.00276763	-0.00228236	0.00611807	-0.0229276	0.0041562	-0.00434874	0.00310201	-0.000642208
-30	0.00229697	0.00383398	-0.00699753	-0.0132911	0.0156492	0.0108151	0.0165703	-0.00791647	0.0127929	0.00355497	0.0136377	0.00761875
-20	0.0165225	0.0204342	0.00728584	0.0106745	0.0283625	0.021469	0.0246302	0.00734448	0.0239297	0.0140001	0.0267186	0.0182637
-10	0.0329937	0.0410791	0.0247479	0.0387406	0.0443448	0.0351065	0.0384748	0.0273452	0.0379768	0.0284125	0.0437632	0.0339063
0	0.0581581	0.0680882	0.0448487	0.0692835	0.0615576	0.0540754	0.0544134	0.0543819	0.0592737	0.0498973	0.0678107	0.0569325
10	0.0970583	0.105517	0.0756657	0.106891	0.0852194	0.0820386	0.0784528	0.0889392	0.0900353	0.0831866	0.101038	0.0918059
20	0.149222	0.15597	0.115401	0.153052	0.122617	0.123487	0.112816	0.13707	0.135199	0.134275	0.146664	0.145705
30	0.219142	0.220663	0.174631	0.205998	0.173856	0.188525	0.165732	0.200577	0.201337	0.206432	0.21167	0.220412
40	0.305462	0.299268	0.250475	0.274903	0.25101	0.271579	0.243237	0.284515	0.28659	0.301745	0.295409	0.317464
50	0.409529	0.390353	0.349	0.361046	0.348356	0.377595	0.337424	0.386296	0.38724	0.41627	0.394547	0.432796
60	0.530043	0.494974	0.465959	0.469295	0.46553	0.500346	0.450257	0.507278	0.495995	0.543448	0.504911	0.559104
70	0.666818	0.623391	0.606171	0.601916	0.606643	0.639017	0.581374	0.64947	0.627804	0.685512	0.633172	0.692106
80	0.824711	0.789445	0.783399	0.776784	0.784098	0.808866	0.760565	0.816078	0.797554	0.838855	0.793186	0.838434
90	1	1	1	1	1	1	1	1	1	1	1	1

## Sheet: panel F
CLC-7 F301A
	170913			170915					170916	171117		180126
	38	31	21	12	14	17	18	23	21	43	49	32	35	37	39	41	42	43
-80	0.813785	0.817508	0.797222	0.78801	0.801955	0.799667	0.787525	0.791927	0.785379	0.790169	0.785803	0.801582	0.792803	0.78598	0.790103	0.790698	0.797324	0.793263
-70	0.8152	0.821512	0.799678	0.788976	0.803758	0.800484	0.788568	0.793339	0.788759	0.791605	0.787981	0.80372	0.793415	0.786986	0.790703	0.790893	0.798891	0.794189
-60	0.818774	0.826443	0.804118	0.793256	0.807041	0.802955	0.790978	0.796576	0.791301	0.794615	0.791611	0.807557	0.796456	0.789855	0.794161	0.792991	0.802923	0.79852
-50	0.823644	0.831747	0.809653	0.797148	0.811527	0.806521	0.794708	0.801051	0.795004	0.799511	0.796455	0.81244	0.801028	0.79342	0.799523	0.796785	0.809064	0.803262
-40	0.829319	0.837505	0.815765	0.802766	0.816557	0.811174	0.799511	0.806377	0.79971	0.805681	0.80204	0.817747	0.805155	0.798031	0.800327	0.800715	0.8131	0.808845
-30	0.836049	0.844631	0.823338	0.808951	0.821936	0.816784	0.805281	0.812396	0.806378	0.811418	0.808237	0.822843	0.811573	0.803408	0.808596	0.806293	0.820416	0.815303
-20	0.843415	0.8514	0.830685	0.815915	0.827646	0.823112	0.812009	0.818903	0.810975	0.818231	0.814421	0.829994	0.817764	0.809115	0.814115	0.812472	0.827581	0.822282
-10	0.850912	0.858044	0.838536	0.823933	0.832816	0.830202	0.819538	0.826249	0.816478	0.826496	0.822231	0.836847	0.824867	0.815584	0.821471	0.817984	0.835152	0.828971
0	0.858919	0.865486	0.846864	0.831802	0.838836	0.837704	0.827604	0.833954	0.822976	0.834834	0.829278	0.844355	0.832478	0.822259	0.828723	0.825193	0.842238	0.835399
10	0.867213	0.872193	0.855053	0.839605	0.844099	0.845682	0.836151	0.842357	0.829279	0.843243	0.837388	0.850655	0.839163	0.82942	0.837507	0.832464	0.849756	0.842964
20	0.87517	0.880111	0.863454	0.8482	0.850741	0.854033	0.845618	0.850899	0.836692	0.851781	0.845071	0.859749	0.846973	0.837547	0.844695	0.840418	0.856117	0.852208
30	0.88308	0.888282	0.871796	0.857915	0.857628	0.863115	0.856047	0.860247	0.845564	0.860455	0.854384	0.867223	0.854821	0.846133	0.854564	0.851224	0.864229	0.86072
40	0.890361	0.894643	0.880412	0.868285	0.866718	0.873027	0.867227	0.869985	0.854543	0.869779	0.864545	0.876357	0.865032	0.855757	0.861167	0.859366	0.872311	0.870908
50	0.898667	0.902153	0.889751	0.879073	0.877193	0.883939	0.879481	0.880402	0.865798	0.880629	0.875555	0.885718	0.875007	0.866752	0.873231	0.873113	0.881864	0.880484
60	0.907152	0.910655	0.900132	0.89106	0.888695	0.896154	0.892857	0.892837	0.878841	0.892752	0.888037	0.89698	0.887043	0.879416	0.887232	0.883555	0.895021	0.891981
70	0.916456	0.919836	0.911639	0.905213	0.902921	0.909478	0.907365	0.906388	0.895453	0.905972	0.902669	0.908844	0.901448	0.896159	0.90246	0.899716	0.907303	0.905182
80	0.927639	0.928899	0.925055	0.920949	0.919087	0.923991	0.923084	0.9226	0.915748	0.92139	0.920198	0.923054	0.918994	0.915569	0.920029	0.918865	0.922302	0.92143
90	0.94	0.94	0.94	0.94	0.94	0.94	0.94	0.94	0.94	0.94	0.94	0.94	0.94	0.94	0.94	0.94	0.94	0.94
final individual fits
	bottom		top		V0.5		slope		z=26/slope
	value	stdev	value	stdev	value	stdev	value	stdev
Data Set-A	0.790074	0.0036811	1		43.4398	2.34662	57.7915	2.19497	0.449893
Data Set-B	0.789758	0.00397437	1		38.0316	2.73193	63.6095	2.28147	0.408744
Data Set-C	0.778441	0.00447147	1		45.7253	2.56654	53.5359	2.54842	0.485656
Data Set-D	0.779193	0.00345416	1		55.0869	1.80382	44.3352	2.15693	0.586441
Data Set-E	0.80041	0.00372062	1		65.1546	2.12028	41.3077	2.94994	0.629423
Data Set-F	0.791723	0.00230668	1		57.1307	1.26525	42.9292	1.56318	0.605649
Data Set-G	0.780264	0.00214712	1		55.5891	1.10947	40.9032	1.33363	0.635647
Data Set-H	0.783629	0.00319028	1		55.6964	1.69675	44.1332	2.04928	0.589126
Data Set-I	0.786849	0.00367	1		65.3648	1.97311	37.2793	2.67632	0.697437
Data Set-J	0.77962	0.00374093	1		53.9378	1.98059	45.9732	2.3195	0.565547
Data Set-K	0.780029	0.00386413	1		57.4068	2.00768	43.1153	2.49187	0.603034
Data Set-L	0.791765	0.0036277	1		55.5258	2.05121	47.9012	2.45631	0.542784
Data Set-M	0.787255	0.0037709	1		60.6736	2.01509	42.2417	2.62978	0.615505
Data Set-N	0.784488	0.00349745	1		64.1256	1.85047	37.9024	2.48257	0.685972
Data Set-O	0.785456	0.00347528	1		60.3616	1.83676	40.6708	2.37332	0.639279
Data Set-P	0.787331	0.00288142	1		62.692	1.53949	38.1246	2.02894	0.681975
Data Set-Q	0.786945	0.00475546	1		55.0755	2.63971	48.3543	3.1329	0.537698
Data Set-R	0.784667	0.00384353	1		56.197	2.06763	45.5493	2.51541	0.57081
average	0.785994				55.9564				0.585034
stdev	0.00559421				7.35271				0.0786715
n	18				18				18
sem	0.00131857				1.73305				0.018543
CLC-7 F514A
	5	35	1	12	17	32	44	18	23	29	72	74
-80	0.0710978	0.0657534	0.0708947	0.148026	0.0534981	0.050486	0.0399514	0.0619999	0.0304588	0.0421297	0.0366366	0.0358015
-70	0.066458	0.0680028	0.0725901	0.144824	0.0512306	0.0539899	0.0423758	0.0646041	0.0283981	0.0417674	0.0361576	0.0357686
-60	0.0723896	0.0720886	0.130579	0.158435	0.0539943	0.0564142	0.0413429	0.070166	0.0333363	0.0448229	0.0379598	0.03937
-50	0.0819815	0.0803078	0.0842819	0.15968	0.0641442	0.062511	0.0379628	0.0800648	0.037511	0.0515055	0.045415	0.0458178
-40	0.0957844	0.0928542	0.0913303	0.171112	0.0663086	0.0682515	0.0518294	0.0936084	0.0447373	0.0613957	0.0527518	0.0558985
-30	0.12353	0.111333	0.0982147	0.183594	0.0769069	0.0880574	0.0611733	0.110464	0.0577016	0.0800585	0.065586	0.0744957
-20	0.15873	0.140592	0.119399	0.198683	0.0853235	0.110558	0.0722493	0.134859	0.081101	0.109644	0.0883388	0.107631
-10	0.216464	0.180102	0.136514	0.225869	0.0970507	0.144526	0.0992593	0.168637	0.120667	0.15141	0.123735	0.156147
0	0.285109	0.233	0.180494	0.249344	0.13981	0.20116	0.137692	0.211022	0.173215	0.210898	0.173915	0.222746
10	0.364367	0.298228	0.235468	0.290337	0.200577	0.27842	0.19261	0.268216	0.242632	0.287066	0.235471	0.304458
20	0.452741	0.370463	0.315862	0.349532	0.267677	0.374603	0.278363	0.334699	0.323954	0.376217	0.311038	0.400237
30	0.536014	0.443099	0.408906	0.407508	0.365456	0.477049	0.372368	0.411931	0.414608	0.469341	0.391407	0.494192
40	0.609885	0.511668	0.513134	0.481604	0.474855	0.576643	0.47619	0.493468	0.503637	0.559169	0.473287	0.587631
50	0.678364	0.577955	0.614156	0.571211	0.583331	0.670168	0.571302	0.572589	0.585292	0.643133	0.5461	0.668418
60	0.742884	0.644014	0.706156	0.644985	0.68864	0.746605	0.657928	0.646506	0.662945	0.723671	0.619486	0.737991
70	0.806125	0.713428	0.783903	0.717479	0.770564	0.81756	0.740034	0.717344	0.739851	0.78879	0.699317	0.805811
80	0.865477	0.782535	0.85517	0.782374	0.849551	0.885857	0.816109	0.783946	0.810623	0.856275	0.774995	0.869048
90	0.929707	0.849309	0.921332	0.846092	0.91308	0.933854	0.905567	0.84777	0.883382	0.91602	0.845684	0.931269
final individual fits
	bottom		top		V0.5		slope		z=26/slope
	value	stdev	value	stdev	value	stdev	value	stdev
5	0.035308	0.00881497	1		29.2753	0.916726	27.5072	0.781071	0.945206
35	0.035577	0.00763918	1		41.6951	0.850953	30.9224	0.818704	0.840815
1	0.0757085	0.00651876	1		42.9517	0.718287	21.5506	0.65435	1.20646
12	0.142165	0.00282242	1		50.8216	0.357998	26.5306	0.365365	0.980002
17	0.0473946	0.00265353	1		44.8498	0.284535	20.9141	0.260688	1.24318
32	0.0386517	0.00408977	1		34.9643	0.420227	22.5476	0.368443	1.15311
44	0.0270771	0.00557374	1		44.7441	0.594289	22.7054	0.553258	1.1451
18	0.0441357	0.00251979	1		44.1658	0.282286	28.6001	0.274899	0.909088
23	0.0074342	0.00559943	1		41.2998	0.589678	26.0654	0.549652	0.997491
29	0.0181184	0.00577572	1		35.1037	0.595056	25.2659	0.527188	1.02905
72	0.0151469	0.00644531	1		45.2972	0.701674	27.9901	0.687828	0.928898
74	0.0157456	0.00628325	1		32.5864	0.635078	24.695	0.552576	1.05285
average	0.0418719				40.6462				1.03594
stdev	0.0365542				6.29663				0.126659
n	12				12				12
sem	0.0105523				1.81768				0.0365634
