# Supplementary material for: Divergent Cl- and H+ pathways underlie transport coupling and gating in CLC exchangers and channels
Source: eLife. 2020 Apr 28;9:e51224. doi: 10.7554/eLife.51224 (PMC7274781; doi:10.7554/eLife.51224)
Supplement: Figure 6—source data 1. [file elife-51224-fig6-data1.xlsx]

## Sheet: panel D
CLC-0 WT
		170503					160929			161005	161201	170117		161022		170318	170322		170227			170517
		38	40	44	46	48	6	164	318	315	60	6	8	1	3	60	35	48	119	123	144	87
	-160	0.0641538	0.061736	0.0981621	0.0762512	0.0507873	0.100249	0.0948065	0.0846247	0.0787633	0.173176	0.153223	0.134922	0.0406907	0.0509434	0.0663193	0.0854988	0.116651	0.0698973	0.0470067	0.0771415	0.0895988
	-140	0.0651404	0.101228	0.167958	0.124911	0.0597079	0.175366	0.1509	0.118664	0.0994198	0.168506	0.18668	0.170385	0.0568697	0.0819903	0.0804738	0.106996	0.134079	0.0986774	0.0663065	0.102191	0.124019
	-120	0.121189	0.158024	0.365844	0.187429	0.175441	0.326043	0.279913	0.202412	0.152913	0.208905	0.250799	0.246197	0.0914568	0.140152	0.117848	0.164891	0.219654	0.167887	0.120473	0.16665	0.124824
	-100	0.270638	0.248392	0.530795	0.298643	0.319624	0.514674	0.468467	0.352242	0.274254	0.29222	0.363276	0.375109	0.16008	0.251303	0.19778	0.278974	0.36818	0.301625	0.215011	0.285283	0.283183
	-80	0.440236	0.423741	0.64463	0.458788	0.490148	0.660441	0.627152	0.517761	0.440899	0.42885	0.508107	0.525948	0.282543	0.417641	0.335205	0.448197	0.548095	0.472835	0.355304	0.44481	0.430542
	-60	0.578021	0.571369	0.727026	0.613655	0.63931	0.753599	0.731869	0.646657	0.585545	0.559152	0.639521	0.647551	0.448641	0.571642	0.495483	0.616826	0.699466	0.622222	0.497581	0.577669	0.570354
	-40	0.709768	0.687754	0.788675	0.719872	0.74215	0.813733	0.802157	0.734501	0.692962	0.670581	0.738978	0.733249	0.596529	0.685544	0.627898	0.739301	0.799836	0.730157	0.618059	0.67226	0.680143
	-20	0.787553	0.753385	0.844848	0.78807	0.80888	0.864197	0.854779	0.794425	0.775488	0.745236	0.794763	0.797639	0.705554	0.768108	0.722848	0.819384	0.859183	0.801983	0.703032	0.75381	0.759728
	0	0.829087	0.825298	0.887734	0.840324	0.850635	0.910088	0.898864	0.846735	0.839545	0.812764	0.851621	0.842495	0.785182	0.830464	0.800099	0.876672	0.90137	0.857348	0.784084	0.835819	0.829568
	20	0.868246	0.8665	0.91675	0.885297	0.899886	0.938434	0.9285	0.889106	0.892363	0.859478	0.890429	0.887551	0.849457	0.880807	0.857074	0.906769	0.926495	0.897178	0.848179	0.889829	0.872441
	40	0.913547	0.909764	0.956205	0.922275	0.916011	0.957436	0.952687	0.926182	0.934116	0.907236	0.923521	0.917901	0.901998	0.923206	0.905806	0.934052	0.949288	0.933208	0.905725	0.934925	0.919931
	60	0.955511	0.954286	0.972971	0.960792	0.956276	0.976831	0.976031	0.961547	0.969246	0.954107	0.957133	0.953268	0.950172	0.963243	0.953231	0.96699	0.972857	0.966783	0.952246	0.97243	0.909636
	80	1	1	1	1	1	1	1	1	1	1	1	1	1	1	1	1	1	1	1	1	1
		38	40	44	46	48	6	164	318	315	60	6	8	1	3	60	35	48	119	123	144	87		average	stdev	n	sem
pmin	value	1.25238e-16	1.34838e-16	1.87665e-16	1.53221e-16	1.98458e-16	1.09903e-16	1.73008e-16	1.27512e-16	1.65499e-16	0.0621625	1.99583e-16	1.08552e-16	1.58416e-16	1.56987e-16	1.89097e-16	1.52741e-16	1.01105e-16	1.26627e-16	1.83861e-16	1.19299e-16	1.81463e-16		0.00296012	0.013565	21	0.00296012
	se	0.0519769	0.04175	0.112356	0.0407444	0.0575796	0.0795001	0.0729849	0.0593183	0.0372869	0.0373317	0.0491217	0.0548357	0.0256939	0.0391814	0.0290171	0.0349227	0.0442287	0.0398145	0.0329498	0.0341346	0.0535789
pmax	value	1	1	1	1	1	1	1	1	1	1	1	1	1	1	1	1	1	1	1	1	1
	se
V0.5	value	-66.3621	-64.4989	-95.6852	-71.1947	-73.4804	-96.1473	-91.0922	-76.1518	-67.3609	-60.5047	-79.3366	-79.9025	-49.2717	-64.5655	-55.2337	-71.9205	-83.6736	-71.9781	-54.6426	-66.7351	-65.0916		-71.6586	12.7479	21	2.78182
	se	5.60391	4.70505	11.1476	4.46431	5.92708	7.4216	6.92803	6.38553	4.07214	4.77144	5.63199	6.22309	2.98346	4.29196	3.3748	3.58987	4.26411	4.1843	3.91033	3.84344	6.10854
slope	value	34.7868	37.3046	37.8085	37.3559	33.9509	34.5837	34.1697	37.5996	35.9887	40.6261	42.5555	42.0211	34.3708	35.3149	36.6657	33.3724	32.9981	34.8328	38.0531	37.9156	38.3082
	se	3.69838	3.02087	5.59514	2.74269	3.79515	3.93017	3.86886	3.77434	2.62094	2.99758	3.01306	3.3399	2.16167	2.83905	2.30624	2.3448	2.58624	2.66511	2.63228	2.41086	3.84972
z=26/slope		0.74741	0.696966	0.687675	0.696008	0.765811	0.751799	0.760909	0.691497	0.722449	0.639982	0.610967	0.618737	0.756457	0.736234	0.709111	0.779087	0.787924	0.746423	0.683256	0.685734	0.678706		0.712054	0.0502333	21	0.0109618
CLC-0 F214A
	170503				170504
	5	9	18	20	49	42	45	46
-160	0.552182	0.496624	0.483984	0.587026	0.700545	0.472481	0.530998	0.596355
-140	0.619767	0.56798	0.563943	0.591625	0.737518	0.543462	0.604345	0.648936
-120	0.676366	0.603831	0.598433	0.629415	0.75723	0.596287	0.657973	0.70051
-100	0.710889	0.649796	0.653728	0.661522	0.774077	0.636724	0.700256	0.747366
-80	0.72264	0.704724	0.687753	0.684281	0.782071	0.656193	0.736979	0.778689
-60	0.761509	0.703567	0.703614	0.703886	0.79304	0.694181	0.760805	0.806234
-40	0.777088	0.705163	0.731993	0.72264	0.802003	0.711003	0.778945	0.826805
-20	0.787706	0.711765	0.753605	0.743795	0.810993	0.720003	0.797496	0.841637
0	0.812446	0.722595	0.783157	0.75657	0.825213	0.74024	0.810607	0.847787
20	0.848482	0.732727	0.799239	0.765542	0.847502	0.762712	0.827081	0.863037
40	0.859746	0.778535	0.83574	0.805355	0.872439	0.815371	0.855399	0.888246
60	0.929544	0.871505	0.918061	0.879148	0.925142	0.889034	0.910095	0.934234
80	1	1	1	1	1	1	1	1
CLC-0 F418A
	170609				170322			170323part2
	21	25	28	29	50	37	11	1
-160	0.72887	0.799808	0.816352	0.713935	0.759668	0.674987	0.658325	0.741399
-140	0.835468	0.852868	0.841775	0.771875	0.78345	0.699979	0.650713	0.66472
-120	0.88364	0.885577	0.879003	0.812333	0.80904	0.738517	0.694594	0.691649
-100	0.895786	0.901416	0.898147	0.840355	0.835479	0.771295	0.736024	0.730791
-80	0.905591	0.936689	0.916371	0.869465	0.859644	0.802564	0.769684	0.76269
-60	0.914852	0.951592	0.936646	0.894633	0.883384	0.833695	0.796137	0.798374
-40	0.926753	0.968768	0.951946	0.92416	0.905108	0.864228	0.821038	0.831252
-20	0.934369	0.978153	0.979557	0.946463	0.925067	0.892485	0.856003	0.873943
0	0.966946	0.985072	0.999592	0.963375	0.946065	0.919051	0.905543	0.948004
20	0.971575	0.98898	1.00657	0.977901	0.95809	0.933469	0.897929	0.964433
40	0.969557	0.991928	1.00331	0.992082	0.969919	0.948848	0.905422	0.955819
60	0.977705	0.997529	1.00145	0.995563	0.984972	0.976042	0.953006	0.976461
80	1	1	1	1	1	1	1	1

## Sheet: panel H
CLC-0 WT
		170503		161209_part2	161209	160929					170117	161020	161020-part2	161022	170318	170322		170227		170517
		39	43	7	29	3	4	163	317	332	3	38	1	4	59	34	47	118	143	85
	20	0.362184	0.437272	0.365936	0.364943	0.150063	0.165769	0.248907	0.233574	0.238568	0.148924	0.296473	0.359342	0.261936	0.206505	0.282054	0.308346	0.27595	0.288516	0.333234
	0	0.345319	0.444261	0.334136	0.362299	0.146998	0.160075	0.243495	0.228742	0.23291	0.143503	0.282215	0.346597	0.262723	0.180596	0.266965	0.275266	0.25927	0.250801	0.32633
	-20	0.331251	0.453763	0.31492	0.356678	0.150226	0.156368	0.238808	0.222661	0.22923	0.139629	0.273421	0.337019	0.276127	0.168951	0.255774	0.244695	0.24615	0.234788	0.325773
	-40	0.323164	0.466326	0.305478	0.3505	0.172489	0.158482	0.237425	0.224479	0.229176	0.139813	0.275026	0.328371	0.296636	0.172555	0.248702	0.232672	0.239358	0.227127	0.330129
	-60	0.336409	0.490991	0.327056	0.359436	0.278874	0.186531	0.251328	0.24743	0.244876	0.156621	0.333771	0.34137	0.341842	0.224911	0.273804	0.267548	0.261327	0.244826	0.372222
	-80	0.452698	0.568127	0.465773	0.447837	0.544803	0.331077	0.349836	0.347783	0.340149	0.266993	0.556486	0.427835	0.512889	0.455631	0.478172	0.497592	0.427954	0.389184	0.529504
	-100	0.756023	0.750695	0.7761	0.682251	0.819974	0.664	0.628918	0.64101	0.604696	0.57617	0.842021	0.671627	0.798963	0.846549	0.867471	0.868474	0.804938	0.741317	0.788294
	-120	0.98846	0.927914	0.986546	0.907516	0.976019	0.934072	0.909303	0.928077	0.87794	0.89091	0.993264	0.913194	0.974756	1.04326	1.03507	1.01866	1.03014	1.00733	0.954167
	-140	0.978965	0.975246	0.984946	0.983934	0.978975	0.980939	0.979886	0.980082	0.976549	0.979721	0.981529	0.98888	0.970066	0.948301	0.963654	0.981421	0.954086	0.96271	0.989815
FINAL FIT
		39	43	7	29	3	4	10	163	317	319	332	3	35	38	1	4	59	34	47		average	stdev	n	sem
pmin	value	0.338577	0.449001	0.327241	0.355586	0.145129	0.158688	0.240688	0.227708	0.230209	0.141271	0.278758	0.339956	0.271542	0.182361	0.2613	0.261043	0.253633	0.248162	0.325686		0.265081	0.078996	19	0.0186195
	se	0.00987566	0.00532002	0.0121598	0.00413658	0.00654896	0.00415763	0.00317604	0.00410998	0.00269226	0.00284963	0.00854929	0.00601461	0.00850746	0.0185215	0.0139688	0.0159067	0.0160763	0.0161396	0.00290726
pmax	value	0.999576	1.00385	1.00142	0.996319	0.999838	1.00094	0.997046	1.00025	0.998736	1.0013	0.998365	1.00041	0.996495	0.998827	1.00103	1.00213	0.997556	0.997631	1.00263
	se	0.0187409	0.0146187	0.0227758	0.0106401	0.0110321	0.00910957	0.00785286	0.0096515	0.00746526	0.00730767	0.0146882	0.0152637	0.016188	0.030874	0.0232243	0.0264228	0.0278849	0.029595	0.00593473
V0.5	value	-94.7443	-97.1283	-93.1958	-99.675	-81.9121	-95.2305	-99.2562	-98.1679	-100.628	-99.606	-85.3864	-99.967	-87.9241	-86.1489	-87.2452	-86.681	-90.42	-93.6409	-90.4443		-93.0212	5.89782	19	1.39013
	se	1.28786	1.25045	1.60471	0.711403	0.74498	0.505478	0.44317	0.54251	0.416584	0.364403	1.08489	0.972477	1.18295	1.92215	1.57767	1.79582	1.85631	1.84321	0.450602
slope	value	-8.68637	-13.5222	-9.04457	-10.8151	-12.936	-10.8291	-10.4542	-10.3198	-11.3956	-10.8116	-10.5482	-10.4022	-11.8307	-8.68593	-7.86198	-8.13736	-8.24665	-8.48661	-11.9749
	se	1.09946	1.05051	1.30193	0.633095	0.668304	0.436541	0.400356	0.490081	0.361295	0.324382	0.944123	0.88011	1.01613	1.5908	1.19677	1.42148	1.35758	1.49067	0.383707
z=26/slope		-2.9932	-1.92277	-2.87465	-2.40404	-2.0099	-2.40094	-2.48703	-2.51943	-2.28159	-2.40483	-2.46488	-2.49948	-2.19767	-2.99335	-3.30706	-3.19514	-3.1528	-3.06365	-2.1712		-2.59703	0.420118	19	0.0990227
CLC-0 F214A
		170503			170504		170406
		6	8	19	40	48	4	25	35	41
	20	0.799511	0.785886	0.85947	0.831593	0.695622	0.810306	0.565382	0.69617	0.54712
	0	0.757642	0.758542	0.840692	0.81165	0.682487	0.789951	0.538427	0.696436	0.527835
	-20	0.782398	0.786549	0.868473	0.831376	0.722676	0.817098	0.596373	0.740092	0.584879
	-40	0.842292	0.844871	0.911156	0.871846	0.787822	0.869069	0.699861	0.813185	0.68587
	-60	0.907921	0.903704	0.950438	0.91531	0.858024	0.918757	0.811193	0.869719	0.795361
	-80	0.956022	0.946166	0.973806	0.939227	0.914647	0.955507	0.895452	0.911119	0.875767
	-100	0.981854	0.972272	0.986716	0.952985	0.952773	0.983418	0.942298	0.942555	0.932502
	-120	0.991437	0.986989	0.991893	0.95969	0.975573	1.00007	0.962685	0.966156	0.974367
	-140	1.00542	1.00186	1.00973	1.01009	0.999732	0.999872	1.01662	1.00137	0.999085
FINAL FIT
		6	8	19	40	48	4	25	35	41		average	stdev	n	sem
pmin	value	0.774126	0.769106	0.843468	0.801841	0.670486	0.792696	0.532811	0.66019	0.513635		0.706484	0.119676	9	0.0423119
	se	0.013583	0.0119351	0.0126922	0.0341301	0.0187378	0.0104927	0.02795	0.0279651	0.022983
pmax	value	0.996698	0.994641	1.00037	1.00001	1.00027	1.00013	0.998237	1.00448	0.993226
	se	0.0118599	0.0104288	0.00882369	0.0325815	0.0160643	0.00825483	0.0226183	0.0197787	0.0186524
V0.5	value	-54.474	-55.2384	-47.9848	-58.7204	-55.4824	-51.9477	-53.3839	-50.5173	-53.6042		-53.4837	3.10037	9	1.09614
	se	4.40568	3.96573	5.52625	13.1264	4.25562	3.63876	4.40273	5.54831	3.51858
slope	value	-14.2464	-17.2528	-18.6169	-28.3443	-23.07	-18.3864	-20.4877	-29.1795	-21.1976
	se	4.02841	3.79859	5.32786	15.8473	4.55541	3.53413	4.4543	6.50275	3.61001
z=26/slope		-1.82502	-1.507	-1.39658	-0.917291	-1.127	-1.41409	-1.26906	-0.891037	-1.22655		-1.28596	0.293484	9	0.103762
CLC-0 F418A
		170503				170504		170609		170406	170322
		23	25	29	31	34	37	45	50	37	49	36	10
	20	0.552476	0.548835	0.569343	0.562176	0.471133	0.564728	0.648314	0.51528	0.701123	0.420044	0.560053	0.732843
	0	0.515939	0.519615	0.540516	0.548211	0.463702	0.526787	0.588177	0.497386	0.647551	0.412034	0.530848	0.650127
	-20	0.497051	0.508473	0.524137	0.549283	0.468823	0.509727	0.545723	0.487546	0.641751	0.414305	0.51264	0.622524
	-40	0.504004	0.527332	0.527534	0.570672	0.490198	0.521026	0.525137	0.491683	0.625883	0.435859	0.51582	0.612855
	-60	0.570669	0.620789	0.579506	0.638149	0.544927	0.580069	0.551549	0.534225	0.629727	0.509181	0.586422	0.693238
	-80	0.746416	0.787711	0.720296	0.762592	0.659069	0.706982	0.685353	0.65154	0.740846	0.661282	0.75471	0.864832
	-100	0.89955	0.904706	0.887946	0.876584	0.796904	0.837099	0.882198	0.812571	0.886625	0.816141	0.890747	0.954638
	-120	0.975342	0.965276	0.959189	0.947921	0.899761	0.930112	0.971922	0.920483	0.969575	0.919995	0.955977	0.983576
	-140	1.01238	1.00912	1.00403	0.995483	0.968366	0.994403	1.00996	0.989066	1.0072	0.985987	1.01507	1.03429
FINAL FIT
		23	25	29	31	34	37	45	50	37	49	36	10		average	stdev	n	sem
bottom	value	0.513736	0.5194	0.537277	0.546606	0.460236	0.525037	0.572934	0.495507	0.648939	0.406123	0.524717	0.651369		0.53349	0.0692391	12	0.0208764
	se	0.0132079	0.0130408	0.0106192	0.00654041	0.00483367	0.0134423	0.0223659	0.00935639	0.0146594	0.00680921	0.0143375	0.0249408
top	value	1.00233	1.00066	0.993324	1.00741	0.99763	0.99262	0.999268	0.997869	1.0018	1.00698	1.00862	0.998331
	se	0.0216181	0.0204607	0.0188406	0.0130029	0.0127857	0.0292941	0.0405561	0.0228622	0.0281005	0.0150815	0.0257403	0.0334346
V0.5	value	-82.227	-78.3631	-85.3734	-83.4247	-90.4143	-88.42	-90.7384	-92.8805	-92.2411	-86.314	-83.6444	-77.5185		-85.9633	5.14549	12	1.55142
	se	2.4825	2.60306	2.24277	1.66349	1.31452	3.41121	4.73167	2.31783	3.89105	1.43484	3.02696	5.22619
slope	value	-11.6423	-13.8604	-11.6364	-16.8957	-18.2308	-14.8655	-9.25372	-14.1555	-9.84725	-17.2749	-13.4415	-8.80277
	se	2.23554	2.35397	1.96478	1.49833	1.11826	2.97354	3.71063	1.9748	3.1809	1.26863	2.6958	5.05454
z=26/slope		-2.23324	-1.87584	-2.23436	-1.53885	-1.42616	-1.74902	-2.80968	-1.83674	-2.64033	-1.50507	-1.93431	-2.95361		-2.06144	0.516572	12	0.155752
