# Supplementary material for: Divergent Cl- and H+ pathways underlie transport coupling and gating in CLC exchangers and channels
Source: eLife. 2020 Apr 28;9:e51224. doi: 10.7554/eLife.51224 (PMC7274781; doi:10.7554/eLife.51224)
Supplement: Figure 7—figure supplement 2—source data 1. [file elife-51224-fig7-figsupp2-data1.xlsx]

## Sheet: panel D
F418X +
Phe		170517			171018			171115			180602
		66	68	70	47	48	55	1	3	11	5	37
	-160	0.128643	0.212578	0.134563	0.0835762	0.0823884	0.0837958	0.181622	0.201421	0.113482	0.104042	0.0417801
	-140	0.174679	0.288059	0.220386	0.117864	0.116672	0.10319	0.227435	0.183938	0.14251	0.118497	0.0927358
	-120	0.257417	0.397635	0.344247	0.185058	0.195031	0.156658	0.316574	0.243283	0.208406	0.156971	0.140354
	-100	0.371614	0.50642	0.49146	0.304047	0.338419	0.262815	0.456867	0.405794	0.3729	0.239991	0.226824
	-80	0.491598	0.596205	0.618884	0.457734	0.493279	0.416049	0.585492	0.543151	0.599735	0.352658	0.352399
	-60	0.585344	0.688635	0.71518	0.595792	0.617373	0.568315	0.685129	0.65214	0.766862	0.461752	0.487107
	-40	0.665899	0.750055	0.788522	0.692399	0.712365	0.684895	0.759262	0.735387	0.86236	0.554406	0.599483
	-20	0.737311	0.804534	0.846038	0.77405	0.788549	0.764858	0.812945	0.797748	0.923911	0.6308	0.699863
	0	0.803438	0.850245	0.892166	0.845233	0.847228	0.83159	0.864906	0.852276	0.964743	0.701664	0.796532
	20	0.860602	0.890621	0.927184	0.883625	0.892687	0.881665	0.906531	0.889274	0.989189	0.766889	0.86211
	40	0.911147	0.927063	0.95943	0.916084	0.933449	0.922255	0.940749	0.924733	1.00131	0.8391	0.930734
	60	0.956995	0.960036	0.980898	0.961824	0.965581	0.968724	0.974234	0.9657	0.996234	0.914902	0.974952
	80	1	1	1	1	1	1	1	1	1	1	1
		66	68	70	47	48	55	1	3	11	5	37		average	stdev	n	SEM
pmin	value	1.0887e-16	1.76749e-16	1.00721e-16	1.64407e-16	1.30121e-16	1.53065e-16	1.63445e-16	0.0158959	0.0587234	1.49062e-16	1.16274e-16		0.00678357	0.0178744	11	0.00538932
	se	0.0488904	0.0742014	0.0575733	0.0381905	0.0429631	0.0344826	0.0591801	0.0744638	0.0191629	0.0451159	0.0212392
pmax	value	1	1	1	1	1	1	1	1	1	1	1
	se
V0.5	value	-73.1875	-97.7703	-94.6205	-69.7442	-73.6182	-65.0974	-91.0473	-80.8886	-84.6728	-46.9806	-54.9446		-75.6884	16.1313	11	4.86376
	se	6.10603	9.10643	5.88135	4.28008	4.70601	3.86952	6.70003	8.66689	1.65146	6.22376	2.50546
slope	value	46.986	51.5367	39.2118	38.4667	38.0255	37.1856	44.6058	42.8795	23.525	48.4333	37.679
	se	3.2355	3.76167	2.91248	2.60991	2.81308	2.47965	3.16611	4.55962	1.20248	3.9232	1.69199
z=26/slope		0.553356	0.504495	0.663066	0.67591	0.683752	0.699196	0.582884	0.60635	1.1052	0.536821	0.69004		0.663734	0.161515	11	0.0486987
2,6diMet-Phe		180613				180602
		21	48	19	6	133	121	125	128	88
	-160	0.491273	0.386055	0.257286	0.34153	0.264853	0.350473	0.328968	0.299651	0.386089
	-140	0.405655	0.339923	0.225805	0.305605	0.272501	0.370066	0.350406	0.298426	0.392437
	-120	0.397537	0.327034	0.22489	0.29581	0.271351	0.378455	0.348527	0.299702	0.373056
	-100	0.418588	0.340903	0.260158	0.307137	0.269616	0.379898	0.344261	0.323082	0.371158
	-80	0.488408	0.401013	0.353596	0.369648	0.310384	0.409982	0.370322	0.362661	0.398965
	-60	0.59159	0.504821	0.502833	0.507401	0.41165	0.500505	0.464334	0.4876	0.476099
	-40	0.702267	0.628962	0.662543	0.670917	0.558564	0.635103	0.599646	0.624311	0.58805
	-20	0.790243	0.749127	0.775535	0.80527	0.697484	0.765268	0.72968	0.759482	0.706149
	0	0.8555	0.851909	0.853978	0.899815	0.802871	0.857902	0.837154	0.867685	0.795765
	20	0.898657	0.892553	0.902216	0.954377	0.874714	0.915066	0.899784	0.906975	0.84883
	40	0.934271	0.927901	0.940027	0.980993	0.921712	0.951163	0.938166	0.959675	0.902634
	60	0.963056	0.964408	0.97228	0.99444	0.96232	0.979864	0.972754	0.938707	0.945425
	80	1	1	1	1	1	1	1	1	1
		21	48	19	6	133	121	125	128	88				average	stdev	n	sem
Pmin	value	0.407188	0.328847	0.202483	0.299599	0.240289	0.349517	0.323099	0.279012	0.357268				0.3097	0.0625055	9	0.0208352
	sem	0.0248112	0.0183428	0.0212359	0.0115742	0.0131613	0.00858349	0.0104919	0.0131603	0.0158819
Pmax	value	1	1	1	1	1	1	1	1	1
	sem
V0.5	value	-34.2615	-31.3546	-43.9269	-40.6275	-28.2579	-32.5473	-28.2671	-36.1922	-20.7238				-32.9065	6.96226	9	2.32075
	sem	4.90888	3.17764	2.92286	1.70569	2.06287	1.49153	1.79413	2.04224	3.10799
slope	value	28.5962	26.3631	27.1452	20.6294	27.1567	24.3778	24.5507	25.1508	29.0774
	sem	3.95185	2.60976	2.33168	1.43105	1.69491	1.23682	1.49382	1.67771	2.56459
z=26/slope		0.909212	0.986227	0.957813	1.26033	0.957407	1.06654	1.05903	1.03376	0.894164				1.01383	0.110867	9	0.0369558
C212S F418X + 2,6diMet-Phe		180613			180620	180628
		9	13	60	7	30	32	33	36	49
	-160	0.081527	0.121108	0.0962316	0.0801351	0.103913	0.148939	0.0849823	0.140291	0.193394
	-140	0.0651916	0.10579	0.059192	0.0771716	0.0978651	0.142777	0.0847543	0.135699	0.159947
	-120	0.0767921	0.11731	0.0601117	0.0945143	0.10566	0.14794	0.0940103	0.145865	0.166936
	-100	0.113463	0.161758	0.0890262	0.148723	0.142839	0.176521	0.133424	0.179142	0.210926
	-80	0.203943	0.253674	0.157018	0.271071	0.224886	0.246706	0.218173	0.251541	0.300189
	-60	0.350529	0.399533	0.282532	0.435193	0.367565	0.376332	0.365302	0.378916	0.45147
	-40	0.506488	0.552735	0.446801	0.591708	0.533419	0.536447	0.535851	0.543982	0.617819
	-20	0.642436	0.677192	0.594917	0.718195	0.671315	0.692604	0.681108	0.6892	0.758074
	0	0.749504	0.775986	0.712353	0.811487	0.780278	0.821746	0.790978	0.802229	0.870005
	20	0.829387	0.846854	0.803706	0.875617	0.847142	0.882605	0.864275	0.866974	0.914169
	40	0.895556	0.902588	0.872858	0.923676	0.898821	0.918369	0.915461	0.911348	0.944087
	60	0.95109	0.95387	0.940289	0.965358	0.947576	0.960384	0.959678	0.954672	0.971518
	80	1	1	1	1	1	1	1	1	1
		9	13	60	7	30	32	33	36	49				average	stdev	n	sem
Pmin	value	0.028709	0.0666919	0.0357932	0.0245959	0.0582014	0.117171	0.0394673	0.107772	0.144167				0.0691743	0.0435394	9	0.0145131
	sem	0.0190487	0.0193753	0.0208937	0.0197342	0.0173623	0.0119024	0.0149229	0.0137007	0.0148427
Pmax	value	1	1	1	1	1	1	1	1	1
	sem
V0.5	value	-35.5136	-38.9539	-26.8031	-47.5714	-36.9765	-35.9504	-39.5345	-36.0054	-43.7411				-37.8944	5.79351	9	1.93117
	sem	2.3655	2.46945	2.70195	2.28667	2.18429	1.55186	1.80258	1.79717	1.8755
slope	value	31.9417	32.183	31.1616	31.3826	30.8877	27.6255	30.0997	29.2361	25.7487
	sem	1.84911	1.90553	2.17626	1.7281	1.71534	1.25382	1.4153	1.43418	1.51497
z=26/slope		0.813984	0.80788	0.834361	0.828483	0.841758	0.941159	0.863796	0.889311	1.00976				0.870054	0.0668914	9	0.0222971
C212S F418X + Phe		180628				180620
		40	41	44	48	8	9	11
	-160	0.139909	0.118338	0.129289	0.120106	0.0901617	0.173684	0.0986661
	-140	0.177654	0.158257	0.166838	0.169527	0.113225	0.156967	0.131134
	-120	0.260785	0.247905	0.257412	0.279641	0.173608	0.220336	0.226946
	-100	0.390406	0.402845	0.398059	0.440335	0.283421	0.356536	0.359799
	-80	0.53335	0.560291	0.554842	0.57955	0.413704	0.523622	0.48602
	-60	0.648322	0.686957	0.681331	0.680961	0.526478	0.665283	0.584431
	-40	0.73199	0.771432	0.764279	0.755496	0.621179	0.755796	0.665924
	-20	0.793621	0.826296	0.824563	0.81032	0.697008	0.835958	0.733796
	0	0.848549	0.874828	0.872082	0.858531	0.770941	0.870809	0.798397
	20	0.886965	0.906133	0.901791	0.896536	0.836269	0.905969	0.856314
	40	0.921123	0.93938	0.930761	0.930746	0.891534	0.930826	0.904014
	60	0.959761	0.971339	0.963833	0.965949	0.945597	0.962107	0.950517
	80	1	1	1	1	1	1	1
		40	41	44	48	8	9	11						average	stdev	n	sem
Pmin	value	1.17701e-16	1.36957e-16	1.24276e-16	1.65067e-16	1.65848e-16	0.032958	1.05988e-16						0.00470828	0.0124569	7	0.00470828
	sem	0.0504051	0.0540847	0.0538294	0.0710108	0.0412642	0.0545065	0.0596982
Pmax	value	1	1	1	1	1	1	1
	sem
V0.5	value	-80.8005	-84.2988	-83.7821	-86.0273	-59.4233	-77.8945	-70.2567						-77.4976	9.56281	7	3.6144
	sem	5.771	5.62662	5.79063	7.68927	5.15207	5.91318	7.32131
slope	value	42.8298	37.6668	39.5863	40.5655	43.4372	36.4486	44.936
	sem	3.04034	3.1218	3.12646	4.01446	3.14546	3.51797	4.06524
z=26/slope		0.607054	0.690264	0.656793	0.640938	0.598566	0.713334	0.5786						0.640793	0.04959	7	0.0187432
