# Supplementary material for: Divergent Cl- and H+ pathways underlie transport coupling and gating in CLC exchangers and channels
Source: eLife. 2020 Apr 28;9:e51224. doi: 10.7554/eLife.51224 (PMC7274781; doi:10.7554/eLife.51224)
Supplement: Figure 7—figure supplement 3—source data 1. [file elife-51224-fig7-figsupp3-data1.xlsx]

## Sheet: Tabelle1
F214X+		tRNA		Phe		Cha		2,6F2-Phe
		0.570098		6.48455		4.32847		4.87733
		0.400856		13.3879		5.17536		7.25531
		0.47012		2.92292		12.1195		11.2767
		0.469478		16.5403		3.90488		5.74501
		0.390026		6.89482		1.78487		8.1683
		0.286986		10.3271		3.93373
		0.246468		6.67656		3.85621
		0.257534		10.38
		0.227263		9.2006
		0.234968												Phe/tRNA		Cha/tRNA		2,6F2-Phe/tRNA
		0.195582
	AVRG	0.340853		9.20165		5.01471		7.46453					AVRG	26.996		14.7123		21.8996
	STDEV	0.124818		4.0703		3.29516		2.48606					STDEV	15.5025		11.0673		10.8402
	N	11		9		7		5
	SEM	0.039471		1.43907		1.34524		1.24303					SEM	5.25337		4.29872		4.44191
F418X+		tRNA		Phe		Cha		2,6F2-Phe		2,6diMethPhe
		0.564362		10.7386		10.8112		6.77361		2.05686
		0.275899		5.82729		10.0283		8.9293		1.95139
		0.388699		14.4795		14.2441		8.43033		5.24045
		0.343129		13.4722		12.5055		8.55298		4.44149
		0.341289		11.5774		24.1436		8.48084		5.36606
		0.278339		5.07042		20.2442		2.32033		2.06562
		0.240197		10.6778		11.2341		2.25441		1.57595
		0.321682		6.32851		16.0234		1.85484		4.41085
		0.250728		10.0445
		0.207597
		0.150054												Phe/tRNA		Cha/tRNA		2,6F2-Phe/tRNA		2,6diMethPhe/tRNA
		0.189547
	AVRG	0.29596		9.80181		14.9043		5.94958		3.38859			AVRG	33.1187		50.3591		20.1026		11.4495
	STDEV	0.109491		3.36259		5.0046		3.21802		1.61989			STDEV	16.7094		25.1601		13.1732		6.92091
	N	12		9		8		8		8
	SEM	0.0330127		1.18885		1.89156		1.2163		0.612261			SEM	5.45737		8.50894		4.6816		2.43119
C212S F418X+		tRNA		Phe						2,6diMethPhe
		0.142448		1.85703						8.25113
		0.172917		2.92674						3.41753
		0.158767		2.32214						3.41102
		0.188036		2.52873						8.2796
		0.178155		3.3901						2.46545
		0.344435		1.83785						1.29644
		0.169226		3.30312						5.23828
				6.97393						1.76345
										1.37005
														Phe/tRNA						2,6diMethPhe/tRNA
	AVRG	0.193426		3.14246						3.94366			AVRG	16.2463						20.3885
	STDEV	0.0681568		1.65692						2.74228			STDEV	10.303						15.8938
	N	7		8						9
	SEM	0.0278249		0.626258						0.969543			SEM	3.99308						5.80749
