# Supplementary material for: Divergent Cl- and H+ pathways underlie transport coupling and gating in CLC exchangers and channels
Source: eLife. 2020 Apr 28;9:e51224. doi: 10.7554/eLife.51224 (PMC7274781; doi:10.7554/eLife.51224)
Supplement: Figure 7—source data 1. [file elife-51224-fig7-data1.xlsx]

## Sheet: panel B
F214X +
Phe		59	53	33	49	50	55	7	45	12
	-160	0.108787	0.180059	0.0800435	0.0828338	0.0790825	0.095726	0.182444	0.0780888	0.0657765
	-140	0.119888	0.237817	0.125297	0.125275	0.122609	0.155841	0.226421	0.11839	0.0985123
	-120	0.1631	0.368813	0.206234	0.191181	0.192807	0.252765	0.311036	0.204315	0.155487
	-100	0.262093	0.473236	0.340424	0.296438	0.306737	0.401161	0.431839	0.348616	0.25596
	-80	0.389298	0.584809	0.491376	0.433258	0.451871	0.555569	0.552915	0.518698	0.393607
	-60	0.525198	0.655725	0.614649	0.547986	0.57933	0.672248	0.661592	0.655197	0.520117
	-40	0.635968	0.693381	0.70296	0.641002	0.674211	0.753901	0.744261	0.749328	0.618973
	-20	0.73403	0.753345	0.767377	0.714941	0.744674	0.816818	0.806755	0.815134	0.694404
	0	0.806941	0.797346	0.821925	0.781597	0.804445	0.867132	0.860333	0.864791	0.766125
	20	0.853273	0.842405	0.866192	0.840775	0.856702	0.907263	0.901064	0.904251	0.834153
	40	0.903149	0.889685	0.90766	0.898915	0.903419	0.94259	0.936226	0.938332	0.892301
	60	0.947089	0.939231	0.952578	0.952599	0.951116	0.972552	0.969458	0.970031	0.953419
	80	1	1	1	1	1	1	1	1	1
		59	53	33	49	50	55	7	45	12			AVRG	STDEV	N	SEM
pmin	value	1.29226e-16	1.1916e-16	1.12779e-16	1.35001e-16	1.92904e-16	1.98438e-16	0.00198795	1.83301e-16	1.13299e-16			0.000220883	0.00066265	9	0.000220883
	se	0.0345972	0.123466	0.055399	0.0439822	0.0487447	0.0514311	0.036967	0.0505763	0.0401794
pmax	value	1	1	1	1	1	1	1	1	1
	se
V0.5	value	-60.7877	-87.9002	-72.1464	-62.8427	-66.6498	-82.882	-87.0038	-77.7894	-57.1488			-72.7946	11.6349	9	3.87829
	se	4.16041	16.5041	6.3818	5.45794	5.80616	5.43579	4.29728	5.23352	4.98832
slope	value	40.95	55.4209	41.0112	43.8906	41.8847	38.2594	45.2225	35.5593	42.3609
	se	2.59781	7.16142	3.68444	3.23751	3.44259	3.02016	2.08465	3.16395	3.1321
z=26/slope		0.634921	0.469137	0.633973	0.592382	0.620752	0.679572	0.574936	0.731172	0.613774			0.616735	0.0723035	9	0.0241012
Cha		170504				170517			180613
		62	67	70	68	83	91	95	26	27	43
	-160	0.0347216	0.0345857	0.125303	0.090084	0.0886147	0.0839423	0.101896		0.0880425	0.0590957
	-140	0.106601	0.07063	0.130862	0.0994814	0.0333246	0.116681	0.138655	0.112139	0.0885274	0.0575444
	-120	0.127095	0.0838346	0.152836	0.100354	0.0462183	0.133386	0.140683	0.119074	0.115561	0.0699781
	-100	0.194824	0.122074	0.203106	0.127623	0.10086	0.176304	0.170346	0.175427	0.189659	0.105199
	-80	0.304745	0.207774	0.328926	0.213043	0.199375	0.27584	0.255707	0.300978	0.340658	0.197628
	-60	0.486269	0.365609	0.498533	0.375051	0.36635	0.432014	0.412283	0.499833	0.52947	0.369806
	-40	0.620966	0.54546	0.628304	0.547988	0.632154	0.587825	0.585664	0.685746	0.681234	0.563494
	-20	0.72675	0.688109	0.757965	0.68339	0.714972	0.700921	0.724333	0.805227	0.779809	0.706062
	0	0.801128	0.78578	0.832674	0.774043	0.794904	0.783908	0.822365	0.881727	0.8476	0.805817
	20	0.833598	0.856182	0.886344	0.836574	0.835961	0.835957	0.880217	0.913086	0.894631	0.872825
	40	0.914486	0.911966	0.926998	0.890499	0.934202	0.888677	0.939663	0.944798	0.933756	0.918981
	60	0.955964	0.959814	0.962648	0.944372	0.954094	0.935797	0.944198	0.972248	0.966169	0.963553
	80	1	1	1	1	1	1	1	1	1	1
		62	67	70	68	83	91	95	26	27	43		AVRG	STDEV	N	SEM
pmin	value	1.98377e-16	0.00563076	0.0725239	0.0412954	0.00237886	0.0313225	0.0812753	0.043595	0.0199043	0.0186328		0.0316559	0.028308	10	0.00895179
	se	0.0346032	0.0172323	0.021854	0.0253431	0.0383733	0.0256379	0.0174017	0.0297273	0.0289603	0.0184467
pmax	value	1	1	1	1	1	1	1	1	1	1
	se
V0.5	value	-53.4942	-42.4892	-51.1244	-38.7689	-44.8755	-45.9024	-42.6079	-56.109	-58.5569	-42.4682		-47.6396	6.71047	10	2.12204
	se	4.04369	2.00289	2.62525	3.14454	4.31884	3.18183	2.14551	2.82405	3.15962	2.11392
slope	value	36.4432	31.1068	31.6811	32.0999	29.5993	36.0433	29.3321	26.9966	31.4277	28.6149
	se	2.79693	1.5441	1.95113	2.42978	3.3565	2.29508	1.68249	2.01819	2.28492	1.66956
z=26/slope		0.713439	0.83583	0.82068	0.809971	0.878399	0.721354	0.886402	0.963086	0.827296	0.908617		0.836507	0.0781113	10	0.024701
2,6F2-Phe		171018					180613
		41	44	105	30	107	30	32	33	35
	-160	0.0726545	0.0675228	0.0678908	0.114878	0.0695804	0.15323	0.140125		0.0877495
	-140	0.0966599	0.0873293	0.101986	0.13088	0.0851216	0.124782	0.124745	0.142012	0.111828
	-120	0.14721	0.126255	0.172722	0.192496	0.112379	0.164457	0.157241	0.152333	0.149698
	-100	0.240354	0.201644	0.305664	0.307666	0.170315	0.253665	0.246306	0.209339	0.223904
	-80	0.37935	0.31478	0.462511	0.45005	0.270721	0.377367	0.362435	0.325288	0.324626
	-60	0.524647	0.442425	0.607609	0.581749	0.3998	0.5024	0.494462	0.447464	0.427489
	-40	0.647589	0.561315	0.708221	0.687595	0.534075	0.615946	0.607468	0.539929	0.523906
	-20	0.743963	0.66462	0.774559	0.782111	0.656724	0.707594	0.701072	0.645102	0.614716
	0	0.820388	0.764514	0.838151	0.8403	0.750549	0.787458	0.779188	0.734389	0.696778
	20	0.878639	0.845178	0.900005	0.895713	0.826039	0.849242	0.840707	0.810291	0.775141
	40	0.924295	0.9009	0.947595	0.941013	0.892344	0.903562	0.893161	0.872731	0.850143
	60	0.96469	0.955523	0.983381	0.969564	0.944831	0.953173	0.945458	0.923782	0.923232
	80	1	1	1	1	1	1	1	1	1
		41	44	105	30	107	30	32	33	35			AVRG	STDEV	N	SEM
pmin	value	1.50498e-16	0.0124071	1.44399e-16	1.2422e-16	0.0208794	0.0467358	0.0427488	0.0261928	0.0192755			0.0186933	0.0177279	9	0.00590931
	se	0.0216441	0.0185374	0.0408105	0.0267227	0.0166031	0.0331984	0.0310545	0.0408483	0.0316027
pmax	value	1	1	1	1	1	1	1	1	1
	se
V0.5	value	-60.2416	-46.9691	-70.3921	-69.9701	-41.3944	-52.9886	-51.4404	-44.416	-40.9128			-53.1917	11.379	9	3.79301
	se	2.48401	2.30425	4.4149	3.00299	2.09323	4.23302	3.9995	5.07258	4.34791
slope	value	37.2986	38.2421	36.2672	38.716	36.6795	39.4249	40.0867	42.7032	44.7526
	se	1.6363	1.61261	2.77481	1.82142	1.53073	2.8267	2.6731	3.07616	2.94834
z=26/slope		0.697077	0.679878	0.716902	0.671556	0.708843	0.659481	0.648594	0.608854	0.580972			0.663573	0.0452819	9	0.015094

## Sheet: panel C
F418X +
Phe		170517			171018			171115			180602
		66	68	70	47	48	55	1	3	11	5	37
	-160	0.128643	0.212578	0.134563	0.0835762	0.0823884	0.0837958	0.181622	0.201421	0.113482	0.104042	0.0417801
	-140	0.174679	0.288059	0.220386	0.117864	0.116672	0.10319	0.227435	0.183938	0.14251	0.118497	0.0927358
	-120	0.257417	0.397635	0.344247	0.185058	0.195031	0.156658	0.316574	0.243283	0.208406	0.156971	0.140354
	-100	0.371614	0.50642	0.49146	0.304047	0.338419	0.262815	0.456867	0.405794	0.3729	0.239991	0.226824
	-80	0.491598	0.596205	0.618884	0.457734	0.493279	0.416049	0.585492	0.543151	0.599735	0.352658	0.352399
	-60	0.585344	0.688635	0.71518	0.595792	0.617373	0.568315	0.685129	0.65214	0.766862	0.461752	0.487107
	-40	0.665899	0.750055	0.788522	0.692399	0.712365	0.684895	0.759262	0.735387	0.86236	0.554406	0.599483
	-20	0.737311	0.804534	0.846038	0.77405	0.788549	0.764858	0.812945	0.797748	0.923911	0.6308	0.699863
	0	0.803438	0.850245	0.892166	0.845233	0.847228	0.83159	0.864906	0.852276	0.964743	0.701664	0.796532
	20	0.860602	0.890621	0.927184	0.883625	0.892687	0.881665	0.906531	0.889274	0.989189	0.766889	0.86211
	40	0.911147	0.927063	0.95943	0.916084	0.933449	0.922255	0.940749	0.924733	1.00131	0.8391	0.930734
	60	0.956995	0.960036	0.980898	0.961824	0.965581	0.968724	0.974234	0.9657	0.996234	0.914902	0.974952
	80	1	1	1	1	1	1	1	1	1	1	1
		66	68	70	47	48	55	1	3	11	5	37		average	stdev	n	SEM
pmin	value	1.0887e-16	1.76749e-16	1.00721e-16	1.64407e-16	1.30121e-16	1.53065e-16	1.63445e-16	0.0158959	0.0587234	1.49062e-16	1.16274e-16		0.00678357	0.0178744	11	0.00538932
	se	0.0488904	0.0742014	0.0575733	0.0381905	0.0429631	0.0344826	0.0591801	0.0744638	0.0191629	0.0451159	0.0212392
pmax	value	1	1	1	1	1	1	1	1	1	1	1
	se
V0.5	value	-73.1875	-97.7703	-94.6205	-69.7442	-73.6182	-65.0974	-91.0473	-80.8886	-84.6728	-46.9806	-54.9446		-75.6884	16.1313	11	4.86376
	se	6.10603	9.10643	5.88135	4.28008	4.70601	3.86952	6.70003	8.66689	1.65146	6.22376	2.50546
slope	value	46.986	51.5367	39.2118	38.4667	38.0255	37.1856	44.6058	42.8795	23.525	48.4333	37.679
	se	3.2355	3.76167	2.91248	2.60991	2.81308	2.47965	3.16611	4.55962	1.20248	3.9232	1.69199
z=26/slope		0.553356	0.504495	0.663066	0.67591	0.683752	0.699196	0.582884	0.60635	1.1052	0.536821	0.69004		0.663734	0.161515	11	0.0486987
Cha		170504				170510				180602
		7	13	9	14	27	29	33	35	95	102	107
	-160	0.142593	0.0438689	0.0768147	0.0490255	0.101625	0.0710378	0.112077	0.101787	0.0608448	0.0472577	0.0556704
	-140	0.138838	0.0498004	0.0798356	0.0526604	0.116588	0.0773525	0.122333	0.113576	0.0687283	0.0516162	0.0643269
	-120	0.14434	0.0542765	0.0853049	0.0617193	0.135849	0.0882348	0.148885	0.130062	0.0781373	0.0589864	0.0679143
	-100	0.16207	0.0679024	0.111436	0.0866944	0.172539	0.110296	0.190826	0.160359	0.0940027	0.0701356	0.0830228
	-80	0.212915	0.112778	0.186046	0.146481	0.248761	0.17244	0.266999	0.23959	0.12507	0.0981815	0.110443
	-60	0.314134	0.20764	0.310225	0.262533	0.371783	0.297392	0.375021	0.39098	0.199413	0.165754	0.169451
	-40	0.458279	0.366405	0.45986	0.41409	0.536795	0.46395	0.524925	0.563461	0.328978	0.288695	0.287845
	-20	0.624271	0.539881	0.600636	0.560117	0.69594	0.628857	0.68033	0.702005	0.485434	0.438216	0.428591
	0	0.747684	0.701409	0.719333	0.68835	0.819488	0.762147	0.819502	0.786289	0.634054	0.597917	0.57952
	20	0.846858	0.806287	0.809191	0.793984	0.903121	0.854878	0.893172	0.87633	0.754793	0.736155	0.701545
	40	0.914265	0.889613	0.883077	0.877421	0.94992	0.920262	0.955223	0.932189	0.852244	0.846817	0.812013
	60	0.960291	0.95127	0.944629	0.945351	0.980934	0.965014	0.963048	0.970449	0.928949	0.926628	0.908687
	80	1	1	1	1	1	1	1	1	1	1	1
		7	13	9	14	27	29	33	35	95	102	107		average	stdev	n	SEM
pmin	value	0.117607	0.0245594	0.0429118	0.0227022	0.0936348	0.0519612	0.101871	0.0720126	0.0504874	0.0395544	0.0468212		0.0603748	0.0316729	11	0.00954975
	se	0.00879565	0.0091472	0.0148506	0.0119531	0.00458381	0.00939412	0.00672989	0.013085	0.0103219	0.00821212	0.0120605
pmax	value	1	1	1	1	1	1	1	1	1	1	1
	se
V0.5	value	-25.9058	-21.8024	-28.9098	-24.6859	-38.3534	-30.7882	-37.193	-39.99	-13.2209	-9.5527	-6.24375		-25.1496	11.5781	11	3.49094
	se	1.20375	1.15562	1.93361	1.53852	0.570347	1.17251	0.861452	1.62105	1.41833	1.1173	1.70547
slope	value	27.4081	27.4742	32.1338	31.0609	26.8929	27.7643	28.1125	29.4571	29.4287	27.8538	29.8084
	se	0.991561	0.958004	1.53907	1.24661	0.461195	0.955765	0.691687	1.27857	1.18698	0.944332	1.44884
z=26/slope		0.948624	0.946343	0.809116	0.837065	0.966799	0.936454	0.924856	0.882639	0.88349	0.933445	0.872237		0.903734	0.0504494	11	0.0152111
2,6F2-Phe		171018					171115			180602
		12	20	23	58	59	56	57	68	55	61
	-160	0.319528	0.286138	0.371157	0.220338	0.245844	0.25562	0.224903	0.242364	0.230226	0.260592
	-140	0.465747	0.448734	0.546925	0.385989	0.374891	0.366995	0.314517	0.324958	0.367786	0.387684
	-120	0.617465	0.652483	0.688377	0.614369	0.552254	0.520773	0.471352	0.475722	0.514335	0.559169
	-100	0.732675	0.797164	0.778064	0.7794	0.698002	0.665762	0.624955	0.626393	0.625271	0.701616
	-80	0.806536	0.876548	0.838807	0.868473	0.787265	0.758576	0.710092	0.72009	0.700629	0.787898
	-60	0.847225	0.916772	0.878799	0.913317	0.838309	0.813447	0.766702	0.781069	0.749096	0.836675
	-40	0.880757	0.94062	0.914506	0.937139	0.870668	0.850578	0.824785	0.825743	0.786888	0.866341
	-20	0.9065	0.953629	0.943697	0.948988	0.899977	0.87693	0.834889	0.857817	0.8243	0.892605
	0	0.930877	0.965073	0.960952	0.960089	0.923839	0.907805	0.872615	0.886799	0.855693	0.91667
	20	0.947488	0.971322	0.972993	0.971099	0.946196	0.934027	0.908953	0.90791	0.889536	0.939847
	40	0.966014	0.979667	0.977719	0.981425	0.965625	0.949836	0.930788	0.928702	0.926679	0.960576
	60	0.981243	0.988473	0.983203	0.99011	0.982569	0.970408	0.950487	0.968324	0.961431	0.979456
	80	1	1	1	1	1	1	1	1	1	1
		12	20	23	58	59	56	57	68	55	61			average	stdev	n	SEM
pmin	value	1.12806e-16	1.20135e-16	1.01508e-16	1.96737e-16	1.46941e-16	1.03196e-16	1.57305e-16	1.44755e-16	1.55734e-16	1.76967e-16			1.41608e-16	3.18816e-17	10	1.00818e-17
	se	0.226159	0.141222	0.26275	0.120539	0.182649	0.181253	0.19853	0.175492	0.238764	0.20378
pmax	value	1	1	1	1	1	1	1	1	1	1
	se
V0.5	value	-135.645	-135.728	-145.718	-129.543	-124.254	-121.722	-111.913	-114.539	-115.532	-125.83			-126.042	10.8	10	3.41525
	se	20.3688	9.18555	21.2585	7.64867	15.9467	17.7179	21.5436	18.3602	28.2958	18.2981
slope	value	42.2894	28.4149	39.6009	26.0213	38.049	43.2552	46.9205	45.3734	53.3082	39.8081
	se	6.28025	3.35631	5.89318	3.24429	5.89708	6.33526	8.18794	6.91195	9.84088	6.49674
z=26/slope		0.614811	0.915014	0.656551	0.999181	0.68333	0.601083	0.554129	0.573023	0.48773	0.653133			0.673799	0.16081	10	0.0508527
C212S F418X + 2,6diMet-Phe		180613			180620	180628
		9	13	60	7	30	32	33	36	49
	-160	0.081527	0.121108	0.0962316	0.0801351	0.103913	0.148939	0.0849823	0.140291	0.193394
	-140	0.0651916	0.10579	0.059192	0.0771716	0.0978651	0.142777	0.0847543	0.135699	0.159947
	-120	0.0767921	0.11731	0.0601117	0.0945143	0.10566	0.14794	0.0940103	0.145865	0.166936
	-100	0.113463	0.161758	0.0890262	0.148723	0.142839	0.176521	0.133424	0.179142	0.210926
	-80	0.203943	0.253674	0.157018	0.271071	0.224886	0.246706	0.218173	0.251541	0.300189
	-60	0.350529	0.399533	0.282532	0.435193	0.367565	0.376332	0.365302	0.378916	0.45147
	-40	0.506488	0.552735	0.446801	0.591708	0.533419	0.536447	0.535851	0.543982	0.617819
	-20	0.642436	0.677192	0.594917	0.718195	0.671315	0.692604	0.681108	0.6892	0.758074
	0	0.749504	0.775986	0.712353	0.811487	0.780278	0.821746	0.790978	0.802229	0.870005
	20	0.829387	0.846854	0.803706	0.875617	0.847142	0.882605	0.864275	0.866974	0.914169
	40	0.895556	0.902588	0.872858	0.923676	0.898821	0.918369	0.915461	0.911348	0.944087
	60	0.95109	0.95387	0.940289	0.965358	0.947576	0.960384	0.959678	0.954672	0.971518
	80	1	1	1	1	1	1	1	1	1
		9	13	60	7	30	32	33	36	49				average	stdev	n	sem
Pmin	value	0.028709	0.0666919	0.0357932	0.0245959	0.0582014	0.117171	0.0394673	0.107772	0.144167				0.0691743	0.0435394	9	0.0145131
	sem	0.0190487	0.0193753	0.0208937	0.0197342	0.0173623	0.0119024	0.0149229	0.0137007	0.0148427
Pmax	value	1	1	1	1	1	1	1	1	1
	sem
V0.5	value	-35.5136	-38.9539	-26.8031	-47.5714	-36.9765	-35.9504	-39.5345	-36.0054	-43.7411				-37.8944	5.79351	9	1.93117
	sem	2.3655	2.46945	2.70195	2.28667	2.18429	1.55186	1.80258	1.79717	1.8755
slope	value	31.9417	32.183	31.1616	31.3826	30.8877	27.6255	30.0997	29.2361	25.7487
	sem	1.84911	1.90553	2.17626	1.7281	1.71534	1.25382	1.4153	1.43418	1.51497
z=26/slope		0.813984	0.80788	0.834361	0.828483	0.841758	0.941159	0.863796	0.889311	1.00976				0.870054	0.0668914	9	0.0222971

## Sheet: panel D
F214X +
Phe		170517		170525			171115
		74	77	32	44	51	13	17
	20	0.404676	0.425199	0.215032	0.171829	0.191501	0.257906	0.301278
	0	0.379438	0.410561	0.205044	0.170081	0.189733	0.25589	0.283087
	-20	0.363717	0.404419	0.197774	0.170489	0.191719	0.256935	0.272694
	-40	0.352941	0.406992	0.194389	0.178749	0.20138	0.266321	0.271178
	-60	0.35947	0.429736	0.229667	0.233932	0.25816	0.310764	0.303174
	-80	0.444753	0.525382	0.442336	0.454046	0.475508	0.463535	0.471782
	-100	0.702452	0.729968	0.822467	0.806323	0.800548	0.698517	0.798369
	-120	0.95573	0.916892	1.01804		0.985282	0.890627	0.991003
	-140	0.99227	0.982315	0.962882	0.992657	0.972236	0.971169	0.979191
		74	77	32	44	51	13	17				AVRG	STDEV	N	SEM
Pmin	value	0.370099	0.410287	0.20362	0.169861	0.189669	0.256468	0.278224				0.268318	0.0920313	7	0.0347845
	se	0.00919766	0.0057524	0.0137212	0.000492038	0.00905008	0.00258448	0.00862398
Pmax	value	1.00028	0.998801	0.996085	0.995551	0.997906	0.995823	0.998709
	se	0.0198443	0.0149008	0.0235658	0.00103216	0.0162615	0.00661221	0.0156643
V0.5	value	-98.9557	-97.5641	-87.9761	-86.9853	-86.6085	-94.2069	-90.1671				-91.7805	5.12577	7	1.93736
	se	1.24061	1.16486	1.51046	0.0574106	1.06978	0.447226	1.09229
slope	value	-8.43403	-12.2468	-8.83266	-10.5357	-11.1114	-14.1617	-9.51101
	se	1.28357	0.998062	1.18369	0.0471892	0.920511	0.378553	0.866866
z=26/slope		-3.08275	-2.12301	-2.94362	-2.4678	-2.33995	-1.83594	-2.73367				-2.50382	0.447334	7	0.169076
Cha		170504				170517				180613
		61	63	66	69	84	92	94	96	42
	20	0.424618	0.39956	0.678512	0.641896	0.38532	0.733707	0.463619	0.360013	0.432441
	0	0.44183	0.399415	0.662531	0.582421	0.359825	0.665661	0.400362	0.310049	0.407009
	-20	0.455295	0.401747	0.653874	0.550339	0.342073	0.589826	0.350156	0.28173	0.3892
	-40	0.466728	0.406709	0.65468	0.554306	0.354398	0.557887	0.342776	0.284427	0.38546
	-60	0.489866	0.443404	0.703742	0.63227	0.503437	0.624499	0.460663	0.394152	0.460691
	-80	0.586901	0.599095	0.855338	0.826341	0.802337	0.828338	0.769476	0.694617	0.724318
	-100	0.79648	0.846656	0.96984	0.967491	0.971426	0.974017	0.972097	0.936014	0.941925
	-120	0.941937	0.967769	0.997674	0.990781	0.991156	1.00287	0.992099	0.988129	1.00229
	-140	0.966902	1.01935	0.970428	0.969236	0.911703	0.964942	0.908112	0.929726	0.990881
		61	63	66	69	84	92	94	96	42		AVRG	STDEV	N	SEM
Pmin	value	0.461513	0.399221	0.645492	0.544096	0.330319	0.573286	0.338639	0.271593	0.403239		0.440822	0.124982	9	0.0416607
	se	0.00209975	0.00297761	0.00413042	0.00608441	0.00908396	0.0136767	0.0116972	0.00794613	0.0100702
Pmax	value	0.987884	0.999756	1.00087	0.996652	0.998923	0.997139	0.998697	1.00201	0.998042
	se	0.00643758	0.00671095	0.00499642	0.0069451	0.00937967	0.0159162	0.012892	0.0100808	0.019695
V0.5	value	-93.1535	-87.7439	-76.169	-74.5432	-71.1356	-76.7063	-74.0231	-76.9045	-79.1144		-78.8326	7.07711	9	2.35904
	se	0.4266	0.423815	0.647032	0.746375	0.741338	1.63379	0.961619	0.623631	1.31492
slope	value	-11.6558	-11.0014	-9.55243	-9.69239	-9.9857	-7.94031	-9.05372	-9.99012	-8.62093
	se	0.34043	0.360458	0.617785	0.675809	0.633085	1.66321	0.836233	0.606935	1.35543
z=26/slope		-2.23064	-2.36333	-2.72182	-2.68252	-2.60372	-3.27443	-2.87175	-2.60257	-3.01592		-2.70741	0.318583	9	0.106194
2,6F2-Phe		171018			180613
		27	42	106	29	31	38
	20	0.346779	0.272518	0.301475	0.248392	0.246244	0.183789
	0	0.314487	0.264111	0.276965	0.22643	0.213748	0.177554
	-20	0.291851	0.258117	0.256941	0.210152	0.189829	0.172524
	-40	0.276212	0.257994	0.242771	0.196708	0.172335	0.170392
	-60	0.304365	0.290393	0.241637	0.200944	0.173449	0.188122
	-80	0.483506	0.443805	0.319477	0.292374	0.2607	0.306284
	-100	0.790758	0.740849	0.577082	0.582936	0.565353	0.624231
	-120	0.97473	0.945096	0.868167	0.893488	0.899177	0.902783
	-140	0.985441	0.982967	0.983512	0.993679	0.996823	0.984547
			maybe
	final fit
		27	42	106	29	31	38					AVRG	STDEV	N	SEM
Pmin	value	0.277989	0.253322	0.241721	0.216088	0.19631	0.172732					0.22636	0.0387633	6	0.0158251
	se	0.0108237	0.00482799	0.00819754	0.0103311	0.0147759	0.00336692
Pmax	value	0.999297	0.99829	1.00247	0.998026	1.00319	0.997519
	se	0.0146263	0.00717595	0.0181292	0.0267389	0.0371113	0.00819486
V0.5	value	-90.1059	-92.4443	-102.852	-101.571	-101.611	-98.061					-97.7742	5.33316	6	2.17725
	se	1.05086	0.482833	0.962729	1.36284	1.78606	0.439976
slope	value	-10.3266	-11.3355	-10.7005	-9.56148	-8.96169	-10.9482
	se	0.887403	0.427469	0.871951	1.27119	1.73432	0.388856
z=26/slope		-2.51776	-2.29368	-2.42979	-2.71924	-2.90124	-2.37483					-2.53942	0.229441	6	0.0936687

## Sheet: panel E
F418X +
Phe		170325				170517	171018
		10	14	25	31	69	52	53
	20	0.269172	0.182083	0.160995	0.149602	0.268667	0.403929	0.325555
	0	0.252756	0.17198	0.15539	0.144182	0.265127	0.396765	0.317236
	-20	0.245209	0.166868	0.153756	0.142385	0.264259	0.39377	0.313076
	-40	0.24233	0.170659	0.157813	0.150829	0.267612	0.395188	0.316239
	-60	0.282269	0.216484	0.214801	0.23309	0.298012	0.41891	0.360639
	-80	0.500385	0.453375	0.45783	0.515062	0.440835	0.533126	0.542767
	-100	0.861556	0.815554	0.795306	0.831729	0.735528	0.775592	0.829647
	-120	1.01962	0.997244	0.98033	0.988789	0.95616	0.961557	0.986085
	-140	0.971146	0.981778	0.978244	0.98259	0.978643	0.987326	0.982811
		10	14	25	31	69	52	53			AVRG	STDEV	N	SEM
Pmin	value	0.243043	0.166693	0.147601	0.132397	0.26336	0.393	0.311466			0.236794	0.095297	7	0.0360189
	se	0.0186596	0.0135589	0.0108877	0.0145346	0.00883343	0.00418045	0.0112948
Pmax	value	0.999985	1.00276	0.999778	0.999264	1.00055	1.00335	0.999799
	se	0.0227003	0.0168237	0.0134402	0.0160604	0.0131113	0.00636853	0.0143838
V0.5	value	-86.08	-86.7767	-86.2576	-82.7964	-92.899	-93.7241	-87.5541			-88.0125	3.92129	7	1.48211
	se	1.56219	1.07051	0.859574	1.05535	0.882002	0.5088	1.11663
slope	value	-8.85116	-9.90521	-11.0995	-11.3675	-10.9063	-10.9117	-10.5756
	se	1.32185	0.92079	0.773587	0.995899	0.774031	0.450546	0.971558
z=26/slope		-2.93747	-2.62488	-2.34245	-2.28722	-2.38394	-2.38277	-2.45849			-2.48818	0.225473	7	0.0852207
Cha		170504	170510				180602
		12	26	28	32	34	101	106
	20	0.489767	0.380814	0.548064	0.461499	0.493905	0.7498	0.778381
	0	0.469053	0.38027	0.591038	0.460914	0.50501	0.758225	0.773211
	-20	0.461891	0.400396	0.63289	0.475793	0.528839	0.786221	0.780878
	-40	0.485726	0.485811	0.69966	0.535329	0.590292	0.855868	0.847649
	-60	0.615448	0.701391	0.831088	0.710319	0.745027	0.947217	0.952474
	-80	0.846533	0.913281	0.943158	0.906783	0.908687	0.982641	0.993628
	-100	0.975525	0.979806	0.968647	0.978812	0.972955	0.947477	0.952853
	-120	0.985971	0.951114	0.944407	0.950552	0.951713	0.89024	0.890366
	-140	0.94686	0.889278	0.912191	0.890411	0.908911	0.830445	0.82908
		12	26	28	32	34	101	106			AVRG	STDEV	N	SEM
Pmin	value	0.470407	0.376841	0.554275	0.459977	0.498373	0.750286	0.772482			0.554663	0.150868	7	0.0570228
	se	0.00890215	0.00259708	0.0165848	0.00296796	0.00603996	0.00413985	0.00522479
Pmax	value	1.00844	1.00296	1.00618	1.00396	0.995313	0.993051	0.994591
	se	0.0264874	0.00516712	0.0279858	0.00661671	0.0129228	0.00729314	0.0103861
V0.5	value	-70.5344	-58.9884	-51.6143	-61.6541	-59.5016	-41.7467	-46.3795			-55.7742	9.82341	7	3.7129
	se	1.79825	0.366344	3.15748	0.514726	1.16228	1.25361	1.78371
slope	value	-10.4303	-12.2824	-18.0587	-12.0891	-13.4356	-12.6708	-9.37584
	se	1.38853	0.334557	3.20529	0.461894	1.04991	1.21244	1.50775
z=26/slope		-2.49274	-2.11685	-1.43975	-2.15069	-1.93516	-2.05197	-2.77309			-2.13718	0.42148	7	0.159304
2,6F2-Phe		171018			180602
		13	21	57	66	67
	20	0.131909	0.293274	0.144215	0.166718	0.12933
	0	0.127858	0.285839	0.142532	0.160053	0.125712
	-20	0.12471	0.28374	0.142234	0.152398	0.117928
	-40	0.123555	0.285316	0.142978	0.14938	0.109383
	-60	0.130799	0.301144	0.150867	0.174579	0.128678
	-80	0.189998	0.359099	0.199856	0.304831	0.256681
	-100	0.394702	0.501882	0.369778	0.566292	0.554849
	-120	0.690696	0.700869	0.650692	0.81319	0.834419
	-140	0.908265	0.875657	0.880282	0.9594	0.974269
		13	21	57	66	67					AVRG	STDEV	N	SEM
Pmin	value	0.122502	0.282808	0.13969	0.150914	0.116901					0.162563	0.0685705	5	0.0306656
	se	0.00406504	0.00321612	0.00228267	0.00901054	0.00761328
Pmax	value	1	1	1	0.995388	1.0003
	se				0.0290057	0.022908
V0.5	value	-111.451	-114.228	-114.546	-101.027	-100.915					-108.433	6.9177	5	3.09369
	se	0.439665	0.460323	0.258501	1.5441	1.13956
slope	value	-13.3836	-16.4182	-13.9324	-13.5614	-12.5254
	se	0.391243	0.435987	0.236131	1.25845	0.95382
z=26/slope		-1.94268	-1.5836	-1.86615	-1.91721	-2.07579					-1.87709	0.181415	5	0.0811315
2,6diMet-Phe		180613		180602
		4	24	89	111	124
	20	0.0902011	0.138535	0.22375	0.102852	0.310288
	0	0.075114	0.125422	0.166058	0.0868527	0.225243
	-20	0.0652399	0.114294	0.111009	0.069671	0.157681
	-40	0.0592993	0.104317	0.0741071	0.061089	0.118384
	-60	0.0633183	0.0978934	0.0717602	0.078232	0.115596
	-80	0.10747	0.111122	0.145155	0.17571	0.211686
	-100	0.285093	0.206808	0.378005	0.439418	0.483323
	-120	0.611968	0.481229	0.724667	0.792691	0.841114
	-140	0.889072	0.842192	0.954451	0.96034	0.993498
		4	24	89	111	124					average	stdev	n	sem
pmin	value	0.0482846	0.0945338	0.054799	0.0531528	0.110257					0.0722055	0.0282166	5	0.0126188
	se	0.00777513	0.00544742	0.00946497	0.00398327	0.00656352
pmax	value	1.03852	1.05564	1.04877	1.02405	1.02982
	se	0.0332734	0.0485319	0.0273991	0.00855088	0.0129206
V0.5	value	-116.088	-124.847	-110.156	-105.205	-104.534					-112.166	8.46969	5	3.78776
	se	1.19155	1.52935	1.04016	0.350569	0.556025
slope	value	-13.8406	-12.2281	-13.6406	-13.0457	-11.4739
	se	0.866425	0.875137	0.866553	0.321394	0.5113
z=26/slope		-1.87853	-2.12626	-1.90608	-1.99299	-2.266					-2.03397	0.161675	5	0.0723032
