# Supplementary material for: Divergent Cl- and H+ pathways underlie transport coupling and gating in CLC exchangers and channels
Source: eLife journal article supplement (doi:10.7554/elife.51224), 2020-04-28
Supplement: supp [file elife_poa_e51224_Figure_4_figure_supplement_1.pdf › elife_poa_e51224_Figure_4_figure_supplement_1.pdf]

Figure 4 - Supplement 1

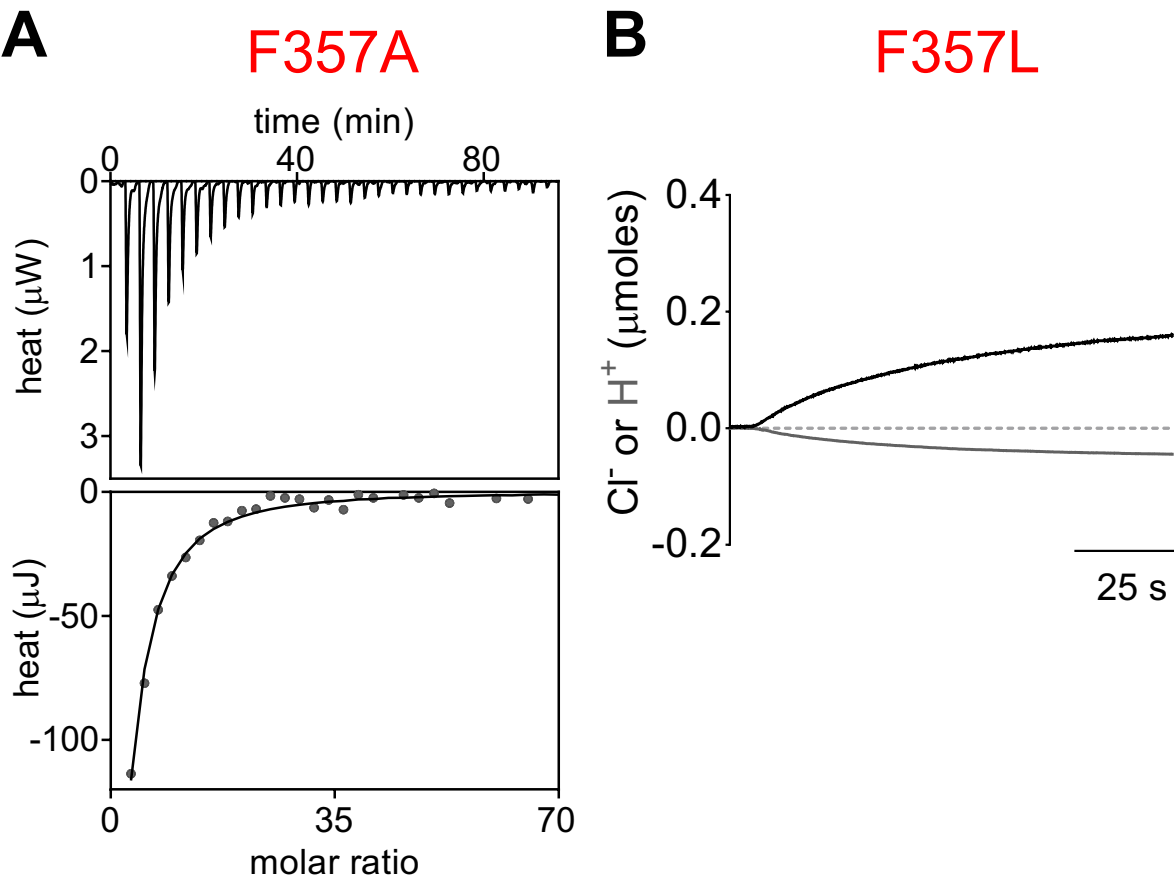

**C**

|             | $\gamma$ ion $\text{s}^{-1}$ ( $\pm$ SEM) | N  | n $\text{Cl}^-$ : 1 $\text{H}^+$ ( $\pm$ SEM) | N |
|-------------|-------------------------------------------|----|-----------------------------------------------|---|
| CLC-ec1     | 2741 ( $\pm$ 687)                         | 12 | 2.3 ( $\pm$ 0.1)                              | 3 |
| F190A       | 652 ( $\pm$ 126)                          | 4  | 8.6 ( $\pm$ 0.2)                              | 6 |
| F357A       | 308 ( $\pm$ 126)                          | 6  | 5.0 ( $\pm$ 1.5)                              | 5 |
| F357L       | 610 ( $\pm$ 139)                          | 4  | 4.7 ( $\pm$ 0.2)                              | 6 |
| E148A       | 974 ( $\pm$ 163)                          | 6  |                                               |   |
| E148A/F190A | 3494 ( $\pm$ 295)                         | 6  |                                               |   |
| E148A/F357A | 582 ( $\pm$ 133)                          | 6  |                                               |   |
