# Supplementary figures and images for: Divergent Cl- and H+ pathways underlie transport coupling and gating in CLC exchangers and channels
Source: eLife journal article supplement (doi:10.7554/elife.51224), 2020-04-28

Figure 2 - Supplement 2

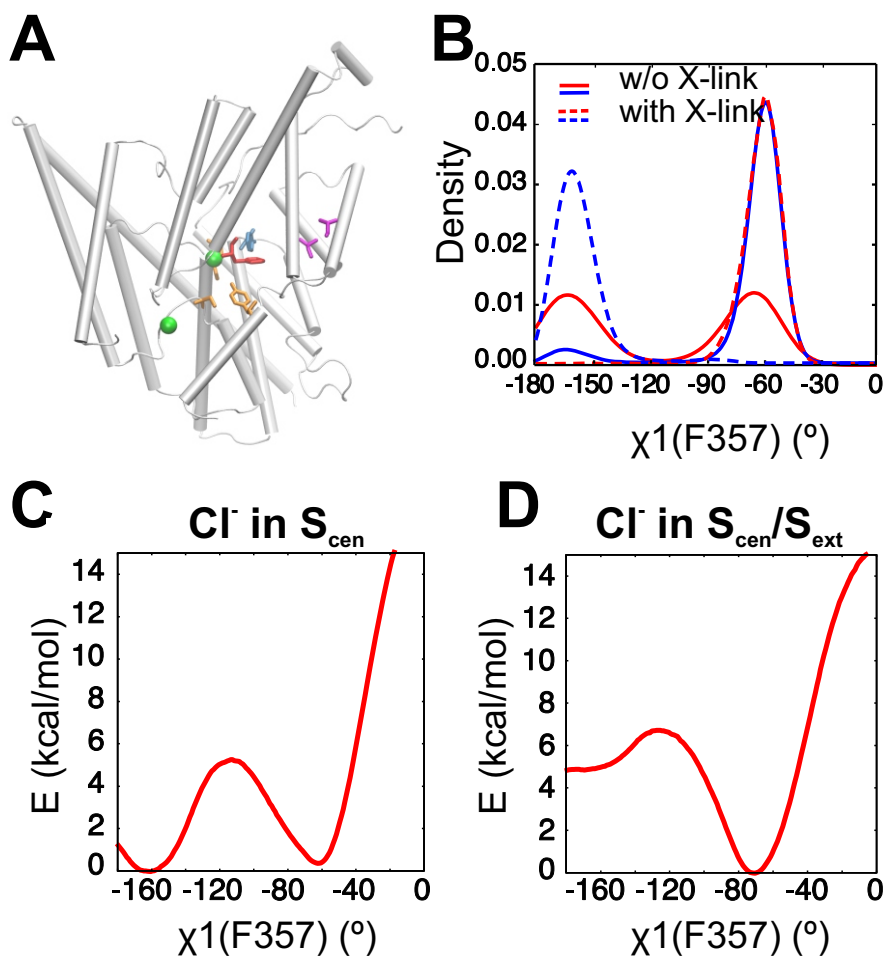

Supplement: supp [file elife_poa_e51224_Figure_2_figure_supplement_1.pdf › elife_poa_e51224_Figure_2_figure_supplement_1.pdf]

Figure 3 - Supplement 1

**A**

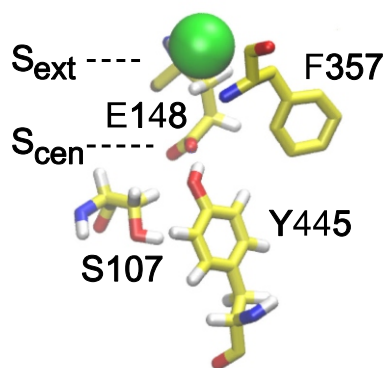

**B**

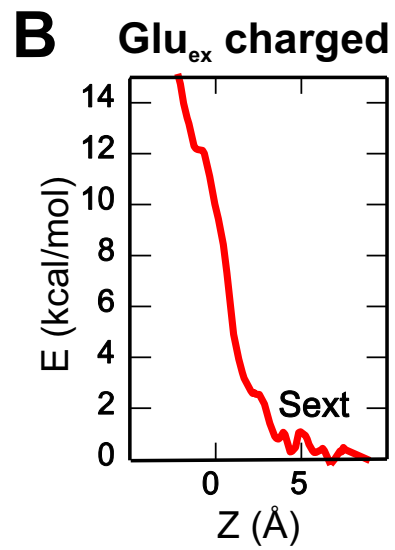

**C**

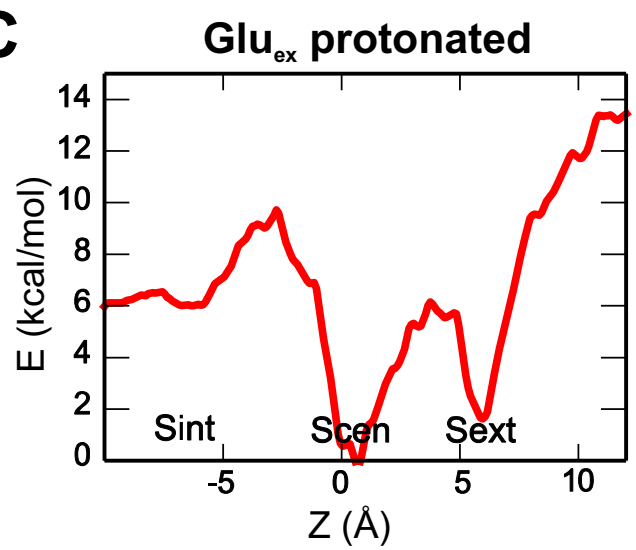

Supplement: supp [file elife_poa_e51224_Figure_3_figure_supplement_1.pdf › elife_poa_e51224_Figure_3_figure_supplement_1.pdf]

Figure 4 - Supplement 2

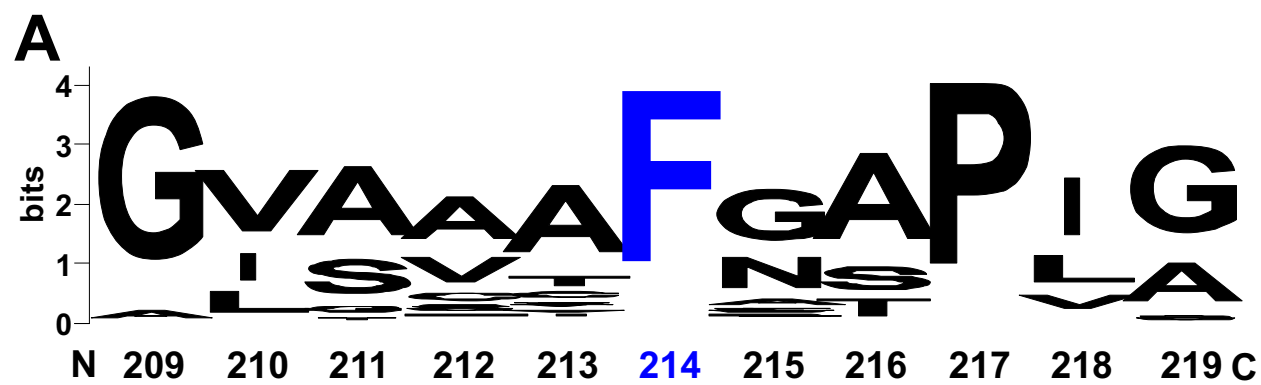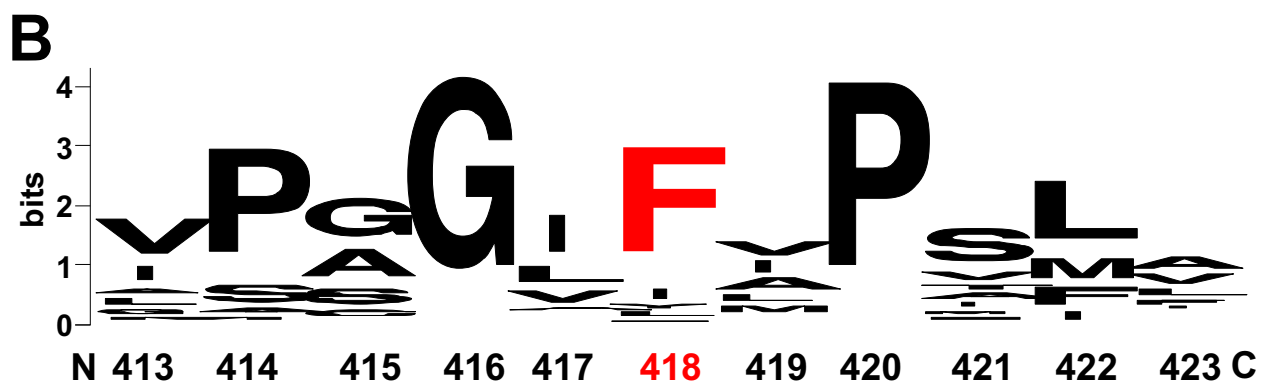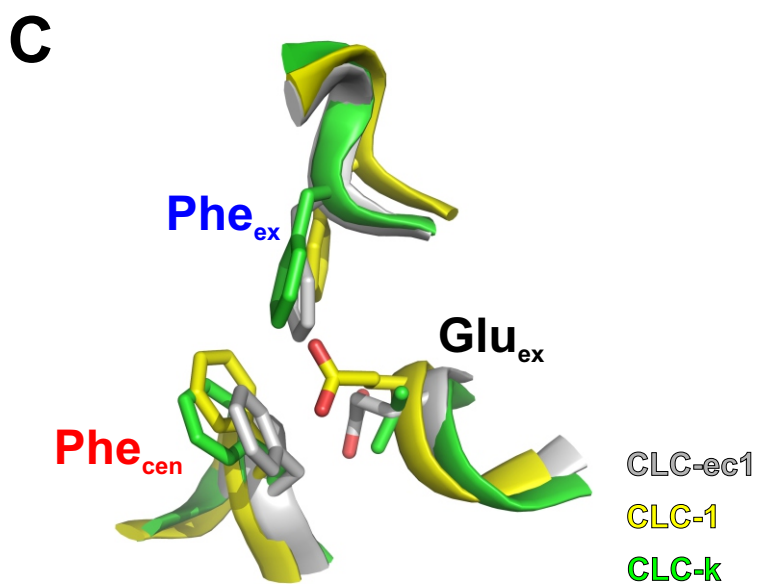

Supplement: supp [file elife_poa_e51224_Figure_4_figure_supplement_2.pdf › elife_poa_e51224_Figure_4_figure_supplement_2.pdf]

Figure 5 - Supplement 1

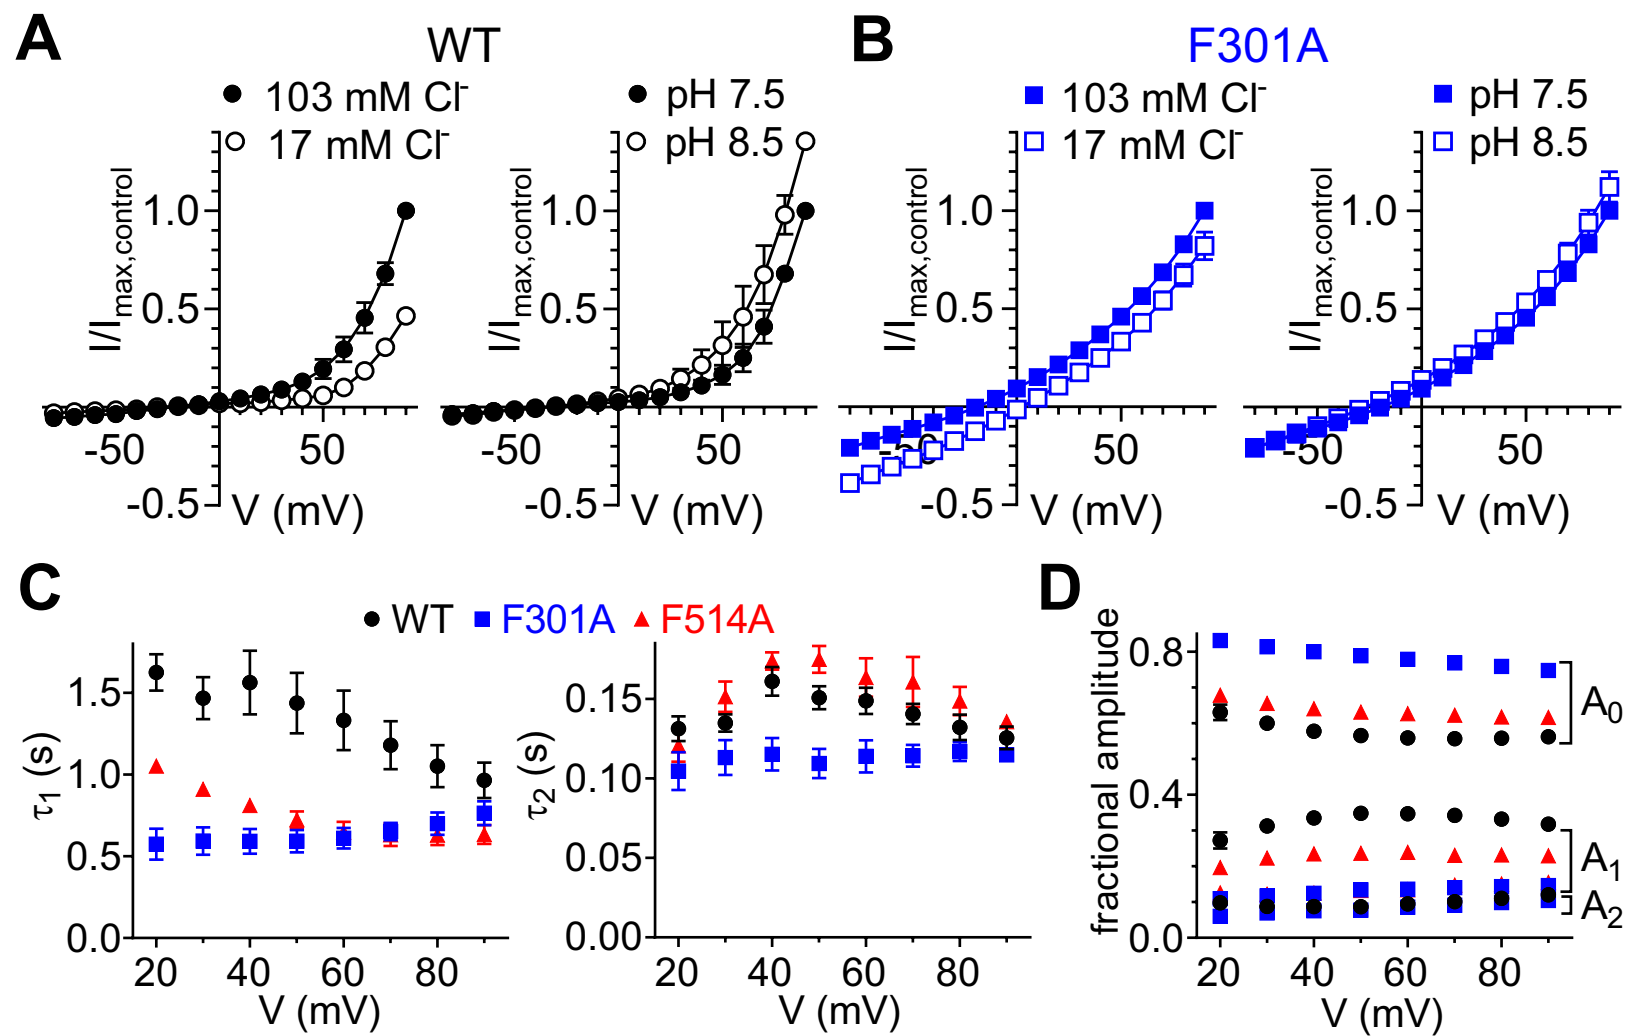

Supplement: supp [file elife_poa_e51224_Figure_5_figure_supplement_1.pdf › elife_poa_e51224_Figure_5_figure_supplement_1.pdf]

Figure 5 - Supplement 2

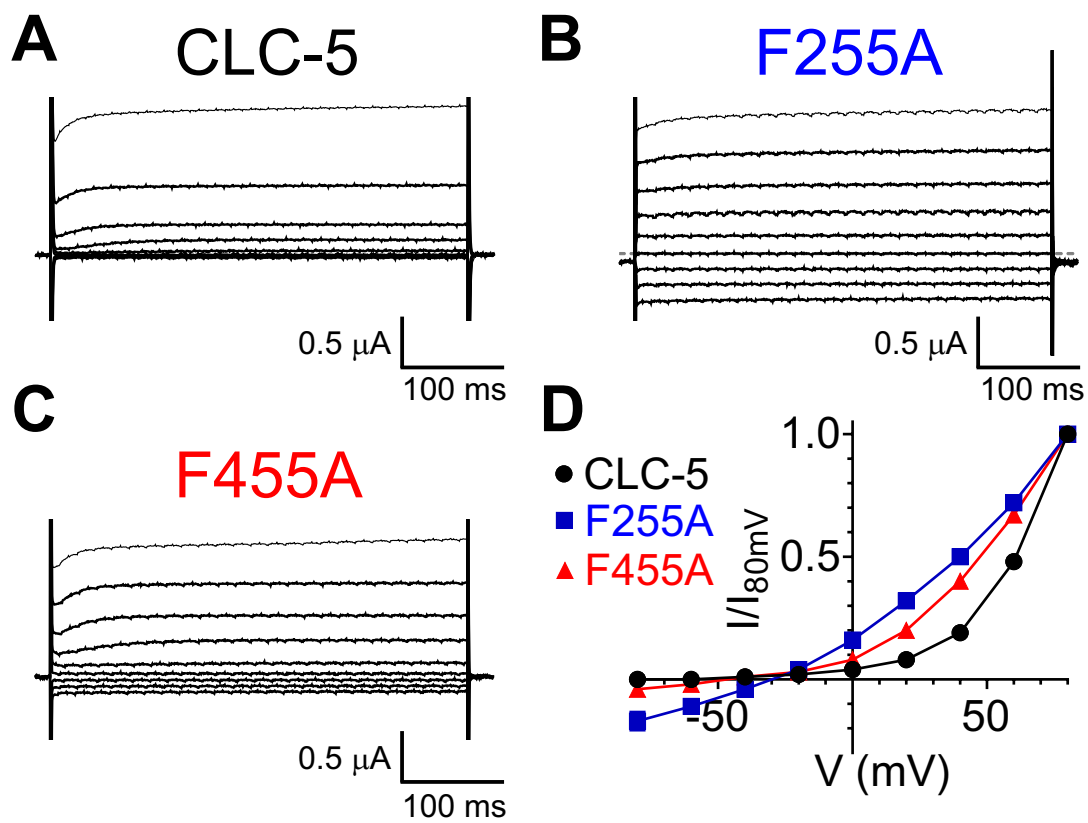

Supplement: supp [file elife_poa_e51224_Figure_5_figure_supplement_2.pdf › elife_poa_e51224_Figure_5_figure_supplement_2.pdf]

Figure 7 - Supplement 1

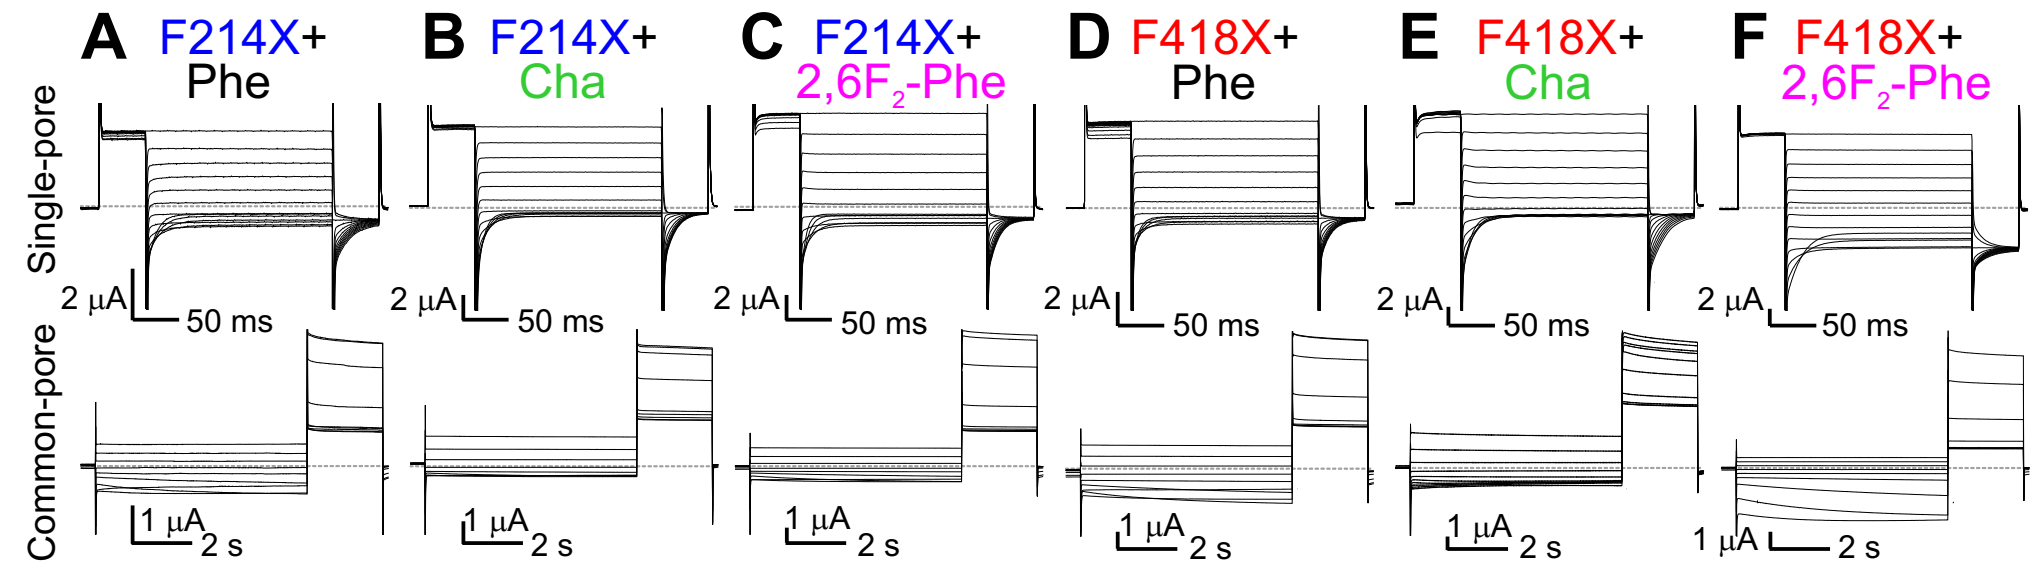

Supplement: supp [file elife_poa_e51224_Figure_7_figure_supplement_1.pdf › elife_poa_e51224_Figure_7_figure_supplement_1.pdf]

Figure 7 - Supplement 2

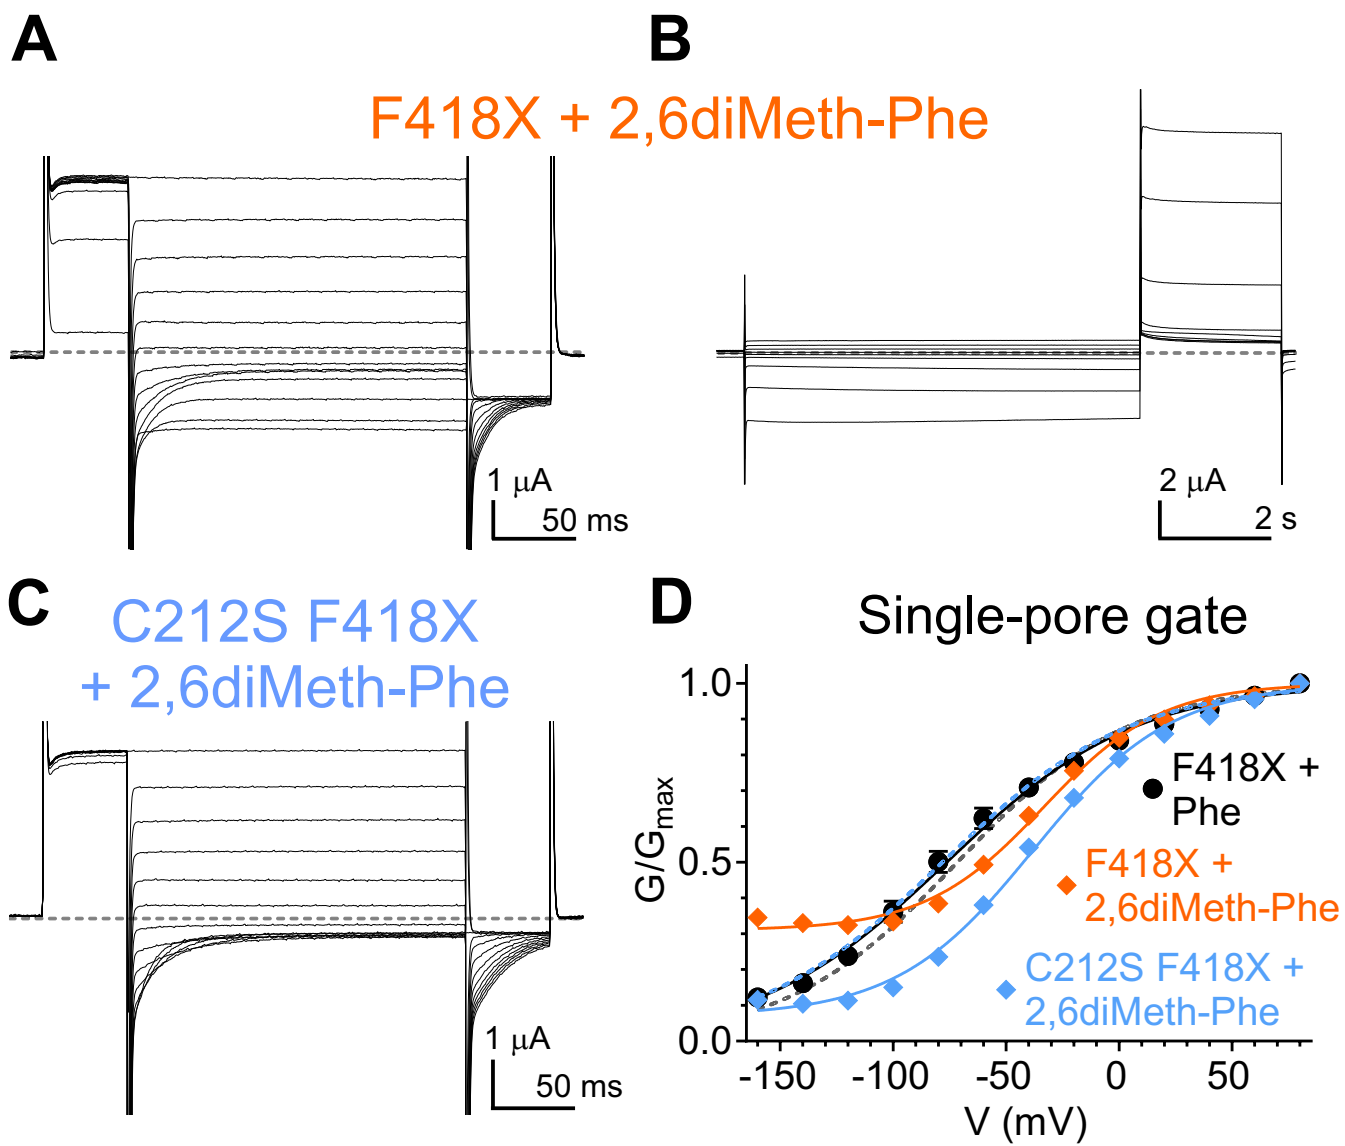

Supplement: supp [file elife_poa_e51224_Figure_7_figure_supplement_2.pdf › elife_poa_e51224_Figure_7_figure_supplement_2.pdf]

Figure 7 - Supplement 3

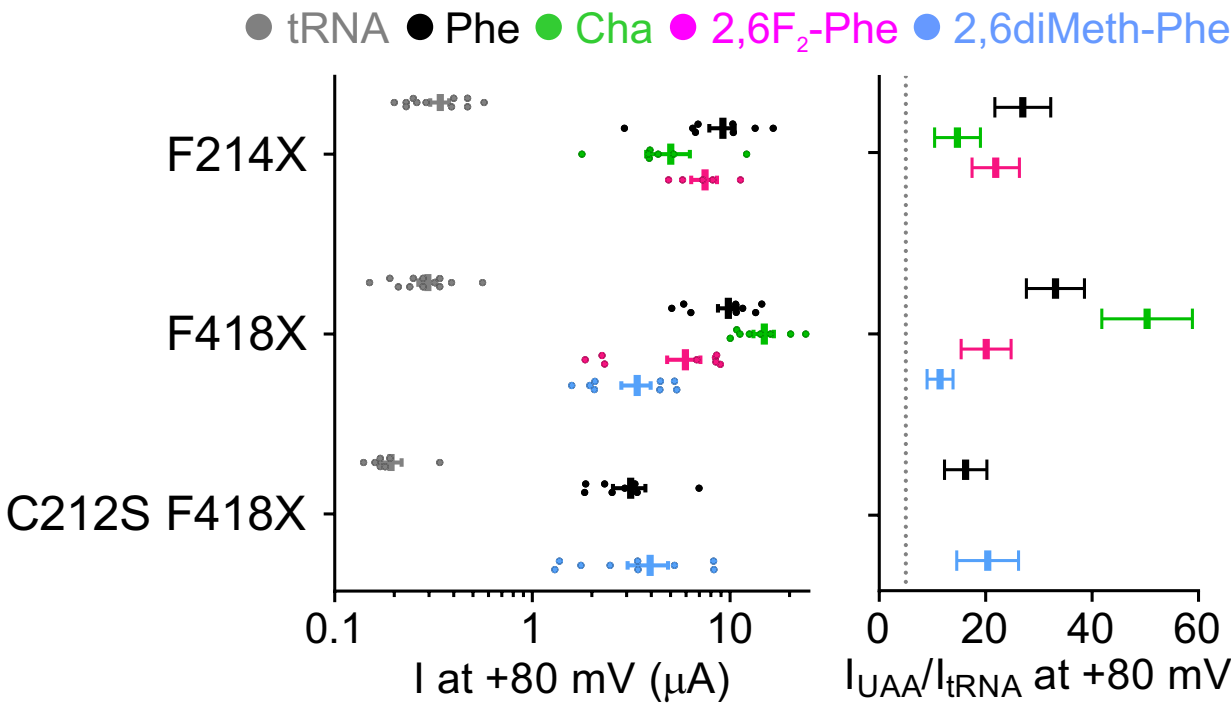

Supplement: supp [file elife_poa_e51224_Figure_7_figure_supplement_3.pdf › elife_poa_e51224_Figure_7_figure_supplement_3.pdf]
